# Supplementary material for: Differential gene expression analysis and physiological response characteristics of passion fruit (Passiflora edulis) buds under high-temperature stress
Source: PeerJ. 2023 Feb 2;11:e14839. doi: 10.7717/peerj.14839 (PMC9899434; doi:10.7717/peerj.14839)
Supplement: Supplemental Information 2 [file peerj-11-14839-s002.xls]

## Sheet: HTvsCK_deg
Annex S2. Raw data of volcano map
gene_id	HT	CK	log2FoldChange	pvalue	padj	gene_start	gene_end	gene_length
snap_masked-LG06-processed-gene-64.8	18703.1	32.6108	9.18108	4.10503e-47	6.64152e-43	6441261	6442032	573
maker-LG01-augustus-gene-1841.26	4370.59	3.1817	10.5584	2.94691e-36	2.3839e-32	184095844	184097706	1004
snap_masked-LG06-processed-gene-65.4	1416.51	14.2617	6.65431	1.01678e-35	5.48347e-32	6535214	6535582	369
maker-LG01-snap-gene-911.9	743.81	2.9615	7.9693	2.57056e-35	1.03973e-31	91138213	91143748	2409
snap_masked-LG07-processed-gene-1228.32	371.464	13.8954	4.71141	3.44525e-28	1.11481e-24	122821966	122823258	1293
maker-Contig20-snap-gene-1.98	251.895	2.59506	6.57945	3.4635e-25	9.33933e-22	279491	283288	1620
maker-LG02-augustus-gene-1357.20	17.3115	1954.94	-6.8206	1.90301e-24	4.3984e-21	135734615	135735716	642
augustus_masked-LG06-processed-gene-65.16	2407.47	18.9635	7.0099	2.85441e-24	5.7727e-21	6564920	6566535	906
maker-LG03-snap-gene-1552.63	179.362	3.56791	5.63047	2.93499e-21	5.27614e-18	155200204	155208256	5143
snap_masked-LG01-processed-gene-1681.46	784.478	85.9795	3.19033	7.36592e-21	1.19173e-17	168167406	168167846	441
snap_masked-Contig8-processed-gene-0.42	381.368	0	11.0128	1.07193e-16	1.57661e-13	44190	45281	879
snap_masked-LG06-processed-gene-149.9	162.805	1.29753	6.94763	1.35344e-16	1.82478e-13	14983959	14989607	3557
maker-Contig10-snap-gene-4.3	195.646	5.65108	5.16109	5.90917e-16	7.35419e-13	518713	522167	2406
maker-LG06-augustus-gene-244.29	212.22	1.49613	7.04166	1.34306e-15	1.55209e-12	24436712	24446479	1924
maker-LG01-snap-gene-1001.1	288.105	0.282521	9.64676	6.18593e-15	6.67214e-12	100117058	100120941	1782
augustus_masked-LG06-processed-gene-157.25	874.518	0.648569	10.3702	1.16927e-14	1.18235e-11	15761377	15761862	486
maker-LG03-snap-gene-1549.4	129.857	4.99073	4.70372	3.75724e-14	3.57579e-11	154888086	154890452	765
augustus_masked-LG06-processed-gene-154.56	214.525	0.732487	8.32897	5.29449e-14	4.75886e-11	15432238	15432954	717
maker-LG01-snap-gene-1050.8	133.022	5.28503	4.70306	2.34834e-13	1.99967e-10	105018004	105020868	1192
maker-LG06-augustus-gene-42.76	133.627	0.889326	7.09482	3.97545e-13	3.21594e-10	4235980	4241437	3071
maker-LG06-augustus-gene-411.16	229.598	5.61992	5.41973	8.61742e-13	6.6391e-10	41174821	41178039	2590
snap_masked-LG06-processed-gene-154.10	108.541	1.87318	5.98779	1.15844e-12	8.51929e-10	15420954	15429828	3333
maker-LG01-snap-gene-1669.43	177.354	0.282521	8.94686	1.37045e-12	9.64025e-10	166955186	166961845	2529
augustus_masked-LG06-processed-gene-67.45	10788.4	536.906	4.32832	1.52686e-12	1.0293e-09	6766847	6767443	597
maker-Contig2-snap-gene-0.48	95.9912	2.1447	5.40411	1.60419e-12	1.03817e-09	27904	33982	3257
maker-LG01-snap-gene-4.22	494.682	40.1526	3.63342	1.71025e-12	1.06423e-09	454565	457422	1836
augustus_masked-Contig2-processed-gene-0.64	160.253	0.606805	7.93312	6.53189e-12	3.91405e-09	16913	20634	1932
maker-Contig20-augustus-gene-1.8	91.6149	0	8.95506	7.87651e-12	4.55122e-09	226941	229361	2226
maker-LG05-augustus-gene-1367.7	27.6007	332.157	-3.58864	1.0609e-11	5.91874e-09	136764526	136768309	2654
maker-LG05-snap-gene-37.93	86.7128	1.33929	6.03023	2.7881e-11	1.50362e-08	3756826	3762405	1408
maker-LG06-augustus-gene-42.72	117.556	0.565041	7.49455	4.3503e-11	2.22917e-08	4202047	4207743	3726
maker-LG01-snap-gene-1922.16	25.8695	296.559	-3.51502	4.40901e-11	2.22917e-08	192250688	192254447	1870
snap_masked-Contig4-processed-gene-3.9	1.33666	488.617	-8.52089	6.82464e-11	3.34593e-08	332811	333002	192
augustus_masked-LG06-processed-gene-42.34	88.6963	2.02963	5.4663	8.96229e-11	4.26473e-08	4226314	4229981	2327
maker-LG01-snap-gene-1983.37	28.267	1024.86	-5.18205	1.08767e-10	5.02784e-08	198345954	198346843	359
maker-LG03-augustus-gene-1532.30	139.792	15.2779	3.21607	4.51062e-10	2.02715e-07	153250907	153253525	1106
maker-Contig11-snap-gene-0.60	77.9503	0.973244	6.30409	7.9459e-10	3.4745e-07	33791	37082	2394
maker-LG01-augustus-gene-1783.27	66.8695	0	8.50125	1.49616e-09	6.37008e-07	178314508	178317255	2508
maker-LG03-augustus-gene-1549.25	59.3008	1.86257	4.9306	3.8953e-09	1.61595e-06	154899176	154905054	4393
snap_masked-LG01-processed-gene-1839.32	297.585	9.67995	4.96464	4.29812e-09	1.73848e-06	183974512	183975654	430
maker-LG01-snap-gene-1536.60	80.5561	1.66397	5.60715	4.51042e-09	1.77985e-06	153626141	153628775	1626
augustus_masked-Contig5-processed-gene-0.28	110.572	4.0908	4.72547	1.38088e-08	5.31936e-06	25109	34963	3714
snap_masked-Contig5-processed-gene-2.8	75.5651	1.46497	5.78389	1.65059e-08	6.21045e-06	269880	273512	1788
augustus_masked-LG03-processed-gene-1552.55	62.3397	0.408202	7.43807	1.7993e-08	6.6161e-06	155214678	155215481	804
maker-LG01-snap-gene-1801.51	93.7142	1862.16	-4.313	2.30187e-08	8.276e-06	180094702	180097001	1345
maker-LG05-snap-gene-37.83	38.9603	0	7.72208	2.45741e-08	8.64314e-06	3762845	3766093	1832
maker-LG06-augustus-gene-1140.4	116.891	6.39417	4.25303	2.90821e-08	1.0011e-05	114021777	114023474	916
maker-Contig11-augustus-gene-0.34	60.2179	1.57966	5.20384	4.43118e-08	1.49358e-05	28189	32967	2505
maker-LG06-augustus-gene-268.14	124.433	25.3528	2.29245	7.87069e-08	2.59877e-05	26786147	26790967	3004
maker-LG06-augustus-gene-310.15	0.987255	151.01	-7.25335	1.31745e-07	4.26302e-05	30988820	30990460	822
maker-Contig29-snap-gene-1.12	66.385	2.51075	4.67942	1.37647e-07	4.36665e-05	189449	192062	1788
maker-LG01-snap-gene-911.8	125.978	9.34506	3.77092	1.64292e-07	5.11169e-05	91137640	91138032	297
maker-LG06-snap-gene-781.8	743.738	1738.59	-1.22506	2.0231e-07	6.17581e-05	78117183	78119767	1038
augustus_masked-LG06-processed-gene-153.7	47.257	0.408202	7.03936	2.0622e-07	6.17859e-05	15383127	15383603	477
snap_masked-LG03-processed-gene-1532.11	7.9612	60.9947	-2.9383	2.88296e-07	8.48062e-05	153218739	153220231	585
maker-LG03-snap-gene-1508.31	249.489	48.4168	2.36204	2.98821e-07	8.63326e-05	150837300	150840951	1764
augustus_masked-LG06-processed-gene-1118.17	57.469	1.5379	5.15558	3.20317e-07	9.09195e-05	111867317	111868522	1206
maker-LG01-snap-gene-55.18	31.527	0	7.41622	3.57019e-07	9.95899e-05	5494201	5496033	534
maker-LG01-snap-gene-129.28	54.0719	0.606805	6.37494	3.82588e-07	0.000104913	12898830	12909098	6795
maker-LG01-snap-gene-1678.15	30.4588	0	7.3676	4.48532e-07	0.000120947	167799372	167803669	2182
maker-LG01-snap-gene-1811.30	88.6815	525.721	-2.56673	5.50273e-07	0.000145949	181154658	181156529	1231
maker-LG01-snap-gene-141.30	46.6286	171.85	-1.88216	6.33179e-07	0.000165229	14172023	14174527	1140
maker-LG01-snap-gene-1812.48	28.757	223.138	-2.95373	9.22181e-07	0.000236825	181282482	181284112	1091
maker-LG02-snap-gene-1796.30	1609.16	10280.9	-2.67558	1.1189e-06	0.000282854	179609312	179610592	984
maker-LG05-augustus-gene-1277.2	236.945	1023.84	-2.11038	1.20866e-06	0.000300844	127734292	127738201	2229
maker-LG01-snap-gene-1698.23	560.512	15.5179	5.17916	1.25533e-06	0.000303845	169818402	169820048	1233
maker-LG01-snap-gene-1699.3	124.185	0.889326	7.03993	1.25828e-06	0.000303845	169948741	169952791	3347
maker-LG05-augustus-gene-37.46	25.3542	0	7.10143	2.29962e-06	0.000547142	3706576	3709095	1614
maker-LG06-augustus-gene-154.30	32.4994	0.324285	6.49826	3.04438e-06	0.000713842	15452896	15454296	997
maker-LG03-augustus-gene-22.16	30.5919	481.188	-3.9772	3.46504e-06	0.000800869	2200336	2203860	2319
maker-Contig5-snap-gene-0.23	395.751	21.2536	4.22503	3.72384e-06	0.000848564	45272	48673	2022
maker-LG07-augustus-gene-1180.54	340.255	46.1943	2.89231	4.47202e-06	0.0010049	118060705	118061979	1041
snap_masked-LG01-processed-gene-802.5	115.172	7.60817	3.95099	4.589e-06	0.00101706	80197364	80197750	387
maker-LG01-snap-gene-1839.44	642.821	75.8904	3.08621	4.66554e-06	0.00102005	183970298	183972065	937
maker-LG06-augustus-gene-245.22	903.072	203.86	2.15009	4.98149e-06	0.00107461	24511653	24518798	2988
snap_masked-LG05-processed-gene-1380.38	515.687	173.643	1.57043	6.49578e-06	0.00138283	138025912	138029645	2398
maker-LG05-snap-gene-1381.30	725.252	277.636	1.38447	6.63366e-06	0.00139384	138121870	138126054	2013
maker-LG03-augustus-gene-159.26	998.767	180.65	2.46984	6.83536e-06	0.00141781	15916145	15919948	2371
augustus_masked-LG05-processed-gene-36.8	99.9908	290.725	-1.53965	7.23681e-06	0.00148208	3666934	3667971	464
maker-Contig13-snap-gene-3.28	1.68387	90.2779	-5.75204	7.68827e-06	0.00155486	307168	308729	1220
maker-LG02-snap-gene-1092.0	3864.22	687.724	2.49084	8.03136e-06	0.00160419	109241484	109243088	1317
maker-LG01-snap-gene-1824.65	30.5669	123.685	-2.01555	8.22975e-06	0.00161799	182469718	182472458	1424
snap_masked-LG06-processed-gene-1319.4	8.52133	180.017	-4.39696	8.30047e-06	0.00161799	131960136	131969042	2540
maker-LG06-snap-gene-1141.11	6.12728	3329.13	-9.0878	8.57173e-06	0.00165098	114131960	114132450	237
maker-Contig11-snap-gene-1.27	108.615	1.78965	5.96877	9.31419e-06	0.00177287	94901	98739	1884
maker-LG03-augustus-gene-1548.34	20.9257	0	6.82483	1.02065e-05	0.00190478	154850711	154854340	1511
maker-Contig37-snap-gene-0.32	138.874	39.8964	1.79345	1.02426e-05	0.00190478	6887	15134	3222
maker-LG06-augustus-gene-8.34	11.3438	80.8821	-2.83407	1.06326e-05	0.00195482	828434	833156	2074
maker-LG06-snap-gene-76.3	125.05	752.308	-2.58959	1.33067e-05	0.00241898	7610522	7617157	2397
augustus_masked-LG06-processed-gene-521.4	294.423	3655.99	-3.63426	1.40705e-05	0.0025294	52140334	52141821	1488
maker-LG03-snap-gene-1460.8	1691.13	478.567	1.82114	1.43865e-05	0.00255778	146055258	146057046	1350
maker-Contig5-snap-gene-4.19	83.8839	6.24728	3.74698	1.51089e-05	0.00265704	414730	424571	4391
maker-LG03-augustus-gene-1542.27	5.08126	112.448	-4.47493	1.75731e-05	0.00305715	154206000	154207185	793
maker-LG01-snap-gene-1675.16	2158.8	287.545	2.90951	1.84316e-05	0.00312806	167496676	167498314	1530
snap_masked-Contig19-processed-gene-2.22	600.313	214.421	1.48447	1.84998e-05	0.00312806	204999	209979	1568
maker-LG08-augustus-gene-1127.84	79.2566	328.698	-2.05039	1.85607e-05	0.00312806	112698088	112699748	1204
maker-LG03-augustus-gene-151.65	91.8831	11.4384	3.04146	2.04488e-05	0.00341073	15118475	15121962	2057
maker-LG05-augustus-gene-960.1	2309.77	622.559	1.8913	2.17994e-05	0.0035989	96000869	96006196	1267
maker-LG02-snap-gene-1732.52	450.139	49.6559	3.18618	2.22547e-05	0.00363696	173274652	173282126	2884
augustus_masked-LG07-processed-gene-1234.14	1.95776	61.3398	-4.95672	2.30346e-05	0.00370338	123425593	123430032	1934
maker-LG06-augustus-gene-1335.34	375.354	1681.08	-2.16298	2.31189e-05	0.00370338	133497841	133500176	2153
snap_masked-Contig34-processed-gene-0.50	372.601	45.7183	3.02912	2.33761e-05	0.00370786	18354	19433	1080
maker-LG01-augustus-gene-1679.28	66.3247	5.72283	3.53908	2.44076e-05	0.00383389	167917688	167924075	3177
augustus_masked-LG01-processed-gene-273.12	20.5374	187.224	-3.18938	2.74197e-05	0.00426562	27320762	27322361	1454
maker-LG08-augustus-gene-1134.54	193.323	1469.11	-2.92561	2.87173e-05	0.00442492	113422722	113425581	2089
maker-LG01-snap-gene-76.19	67.8001	4.86622	3.79457	3.05071e-05	0.00465636	7646869	7650850	477
snap_masked-LG01-processed-gene-1668.9	206.474	52.0616	1.99294	3.09028e-05	0.00467268	166788489	166789406	918
maker-Contig12-snap-gene-1.3	41.6186	0	7.81702	3.23569e-05	0.00482141	155350	156925	768
snap_masked-LG03-processed-gene-1548.48	18.0227	0	6.60892	3.24825e-05	0.00482141	154855570	154857519	1950
maker-LG01-snap-gene-1853.58	1014.53	337.041	1.58901	3.31915e-05	0.00488187	185320051	185321438	924
snap_masked-LG02-processed-gene-1472.18	54.6916	332.165	-2.60384	3.3928e-05	0.00494524	147252392	147260726	1111
maker-LG06-snap-gene-146.62	83.9746	366.291	-2.12378	3.63866e-05	0.00522322	14658494	14659740	944
maker-Contig13-augustus-gene-3.39	34.8442	122.968	-1.81844	3.64809e-05	0.00522322	403890	405681	697
maker-LG03-augustus-gene-1391.6	632.435	206.163	1.61522	3.85132e-05	0.00546583	139107631	139111115	1638
maker-LG09-augustus-gene-24.11	0.679863	35.0125	-5.70922	4.45756e-05	0.00626338	2423922	2424424	397
augustus_masked-LG03-processed-gene-1583.84	3.0079	58.5912	-4.28598	4.49071e-05	0.00626338	158335664	158336482	819
maker-LG01-snap-gene-1666.34	29.7486	0.648569	5.49264	4.5714e-05	0.00632142	166670592	166678957	603
maker-LG01-snap-gene-1845.60	49.9092	460.293	-3.20575	4.9989e-05	0.00685401	184515464	184516414	588
snap_masked-LG01-processed-gene-1822.53	34.9974	184.091	-2.39368	5.15215e-05	0.00700476	182253808	182254608	414
maker-LG03-snap-gene-1531.14	6.70856	62.7924	-3.23268	5.22129e-05	0.0070396	153149086	153154128	2806
maker-LG05-augustus-gene-86.6	809.511	259.611	1.64032	5.34653e-05	0.00714889	8653363	8654516	849
maker-LG03-snap-gene-15.6	211.368	69.8177	1.60138	5.45914e-05	0.00723962	1513642	1519583	1466
maker-LG01-snap-gene-1853.57	845.966	208.527	2.02012	5.54708e-05	0.00729644	185292605	185294101	1033
maker-Contig2-augustus-gene-0.0	92.3857	7.24973	3.65288	5.7919e-05	0.00755703	4168	10558	3044
maker-LG05-augustus-gene-227.12	140.501	38.9489	1.85945	6.0302e-05	0.00780501	22756558	22760906	2338
maker-LG07-snap-gene-1217.13	82.2608	5622.35	-6.09497	6.24526e-05	0.00801921	121751747	121755702	2641
maker-Contig29-augustus-gene-1.94	164.238	64.2042	1.3526	6.31849e-05	0.00804936	199421	202562	2045
snap_masked-LG02-processed-gene-1839.27	61.5689	3.00287	4.36038	6.43399e-05	0.00813246	183975976	183976716	741
augustus_masked-LG01-processed-gene-1682.46	40.2707	4.95996	3.05999	7.03018e-05	0.00881715	168245922	168249879	2644
maker-LG01-snap-gene-1665.14	628.816	202.28	1.63822	7.34966e-05	0.00914694	166557348	166559192	1382
maker-LG01-snap-gene-416.6	82.3043	4.43708	4.2525	7.58e-05	0.00936158	41625427	41627534	2002
maker-LG06-augustus-gene-88.62	4.66046	45.5337	-3.28611	8.10011e-05	0.00992815	8853515	8856150	1456
maker-LG01-augustus-gene-1387.3	1032.32	3398.81	-1.71895	8.5258e-05	0.0103406	138713692	138715568	1174
maker-LG07-snap-gene-1223.18	275.436	57.5162	2.26856	8.56448e-05	0.0103406	122351016	122354247	1980
maker-LG01-snap-gene-814.0	1448.72	622.259	1.21954	8.92232e-05	0.0106929	81454188	81456073	1796
maker-LG03-snap-gene-799.0	308.573	1065.15	-1.78741	9.25685e-05	0.0110123	79924576	79927446	1776
maker-LG07-snap-gene-335.3	13.6415	191.415	-3.81406	9.5637e-05	0.0111961	33504897	33506837	1821
maker-LG01-augustus-gene-1633.3	145.512	50.4027	1.52575	9.58702e-05	0.0111961	163381729	163384346	1764
maker-LG07-snap-gene-886.31	516.063	1891.12	-1.87343	9.61901e-05	0.0111961	88631032	88631635	300
snap_masked-LG01-processed-gene-1790.46	1052.71	467.442	1.17069	9.79595e-05	0.0113206	179024559	179025744	905
maker-LG07-snap-gene-1235.70	1277.46	400.466	1.67449	0.000114237	0.013108	123526257	123529990	2279
maker-LG05-snap-gene-1368.25	108.072	307.156	-1.50714	0.000116255	0.0132457	136808312	136809098	700
snap_masked-LG06-processed-gene-6.86	222.965	84.3365	1.40236	0.000130348	0.0147475	664800	671623	5436
augustus_masked-LG06-processed-gene-6.2	4832.83	2418.8	0.998474	0.000141032	0.0157441	601297	602382	1086
maker-LG05-augustus-gene-1336.36	765.358	254.635	1.58945	0.000141102	0.0157441	133635251	133638598	2719
maker-LG02-snap-gene-1798.82	57.8233	325.242	-2.49106	0.00015007	0.01663	179831385	179833567	1838
snap_masked-LG08-processed-gene-1092.3	19.6781	247.229	-3.65317	0.00015409	0.0169594	109198120	109200726	1741
maker-LG01-snap-gene-1752.88	11.5115	99.2814	-3.11109	0.00016115	0.0176165	175272008	175273622	1346
augustus_masked-LG03-processed-gene-1442.2	429.694	126.891	1.75577	0.000169725	0.0183979	144265869	144266348	480
maker-LG01-snap-gene-1425.2	48.0828	7.30366	2.71897	0.000170572	0.0183979	142582814	142589296	4471
maker-LG01-snap-gene-929.1	233.739	1347.53	-2.5271	0.000172867	0.0184107	92967496	92970643	1227
maker-LG03-snap-gene-1570.75	2.37224	70.4784	-4.90031	0.000172967	0.0184107	157066864	157067494	420
maker-LG05-snap-gene-37.79	24.8074	1.01501	4.63254	0.000177786	0.0186875	3719719	3722584	2778
maker-LG01-augustus-gene-1717.11	698.466	270.609	1.36789	0.000177877	0.0186875	171706097	171707296	927
maker-LG06-augustus-gene-49.40	844.133	1642.96	-0.960396	0.000179415	0.0187274	4954684	4958499	1623
maker-LG03-augustus-gene-1301.1	240.438	1048.23	-2.12448	0.000187292	0.0194243	130111981	130113573	1295
maker-LG08-augustus-gene-1159.49	33.2181	4.78152	2.7725	0.000193298	0.0199196	115910803	115918667	3944
augustus_masked-LG06-processed-gene-207.26	239.65	527.166	-1.13617	0.000215719	0.0220893	20788981	20789697	717
maker-LG01-augustus-gene-177.30	3315.86	1425.01	1.21843	0.000222005	0.0225901	17739376	17743686	3308
maker-LG03-augustus-gene-32.3	5.4389	72.2407	-3.73673	0.000227616	0.0229339	3281784	3282701	665
maker-LG07-snap-gene-1149.2	60.3057	4.27002	3.851	0.000228219	0.0229339	114975257	114977590	1627
augustus_masked-LG08-processed-gene-982.2	431.735	93.0524	2.2138	0.000237426	0.0237118	98271669	98272967	1299
maker-LG01-snap-gene-1602.27	53.3441	1.01501	5.73147	0.000240429	0.0237467	160251436	160253040	1409
maker-LG08-augustus-gene-1149.26	30.5173	116.962	-1.93355	0.000240711	0.0237467	114921774	114927139	3785
augustus_masked-LG09-processed-gene-120.15	221.441	28.3569	2.96511	0.000243594	0.0238855	12007054	12008661	1608
maker-LG08-augustus-gene-189.5	408.983	985.255	-1.26841	0.00025179	0.0243958	18917118	18918387	993
maker-LG02-snap-gene-1830.87	37.5818	183.162	-2.28325	0.000251814	0.0243958	183076102	183078494	870
maker-LG01-snap-gene-1911.0	7.36948	91.3149	-3.6328	0.000258211	0.0247301	191116986	191117999	748
maker-LG07-snap-gene-17.2	39.5311	4.0908	3.24535	0.000258322	0.0247301	1756931	1757598	548
snap_masked-LG01-processed-gene-2019.86	3.18952	2289.88	-9.48447	0.000270212	0.025593	201953564	201954060	497
maker-LG01-snap-gene-1666.25	428.273	158.293	1.43588	0.000270499	0.025593	166617570	166624846	3150
snap_masked-LG03-processed-gene-1574.24	283.132	119.24	1.24935	0.000278924	0.0262367	157466640	157468254	1534
maker-LG06-snap-gene-57.4	91.2828	8.56125	3.4545	0.000285379	0.0266887	5756869	5758658	507
maker-LG03-snap-gene-1554.37	105.535	33.7889	1.6414	0.000289819	0.0269482	155477619	155480448	2351
maker-LG06-snap-gene-1301.26	191.895	73.4106	1.38425	0.000293147	0.0270196	130169798	130171887	1695
maker-LG07-augustus-gene-1196.3	378.909	846.338	-1.15876	0.000293927	0.0270196	119638975	119641552	1521
maker-LG05-augustus-gene-1356.52	243.282	83.4209	1.54214	0.000299499	0.0273032	135625206	135629683	1902
augustus_masked-LG06-processed-gene-274.10	863.73	242.267	1.83431	0.000300387	0.0273032	27449864	27451048	1185
maker-LG06-augustus-gene-79.2	8.98634	85.8213	-3.25773	0.000303437	0.0274263	7908055	7910735	1793
augustus_masked-LG06-processed-gene-68.12	1017.96	224.466	2.18341	0.000309645	0.0276905	6880067	6880747	681
maker-LG01-augustus-gene-177.32	702.599	1707.6	-1.28099	0.000309784	0.0276905	17751471	17754657	2131
maker-LG07-snap-gene-228.31	190.232	80.9877	1.22916	0.000325476	0.0289334	22791478	22795500	1554
maker-LG07-snap-gene-1234.59	677.326	4578.21	-2.75691	0.000331389	0.0292981	123447386	123450725	2010
maker-LG01-snap-gene-1846.41	80.8719	2.7625	4.88713	0.000333832	0.0293536	184663733	184667426	922
maker-LG03-augustus-gene-32.2	6382.6	3163.21	1.01291	0.000355042	0.0310498	3271447	3274403	1727
maker-LG06-augustus-gene-1233.26	24.5098	1.46497	4.14249	0.000357033	0.0310561	123332063	123335296	2470
maker-LG01-snap-gene-1608.49	45.139	139.714	-1.63082	0.000361781	0.0313008	160821123	160830078	3136
maker-LG06-snap-gene-157.34	29.8931	1.63281	4.34154	0.000368051	0.0316739	15725399	15727041	471
maker-LG06-augustus-gene-1326.11	104.365	4.32134	4.55744	0.000376469	0.0321169	132598652	132600966	1099
maker-LG07-augustus-gene-269.0	12.4789	0	6.08012	0.000377168	0.0321169	26934012	26937879	3507
maker-LG01-snap-gene-1694.78	570.506	3278.81	-2.52276	0.000385266	0.0325778	169393799	169396457	1893
maker-LG06-snap-gene-236.26	799.177	273.728	1.54817	0.000387482	0.0325778	23603594	23607259	1857
snap_masked-LG01-processed-gene-1730.20	2308.09	1202.7	0.940444	0.000388622	0.0325778	173084080	173087843	2749
maker-LG03-snap-gene-1552.62	18.1392	0.690723	4.76489	0.000394768	0.0329224	155197037	155200005	1343
maker-LG01-snap-gene-1830.22	15.555	0	6.39588	0.000409442	0.0338	183063326	183065597	2078
maker-LG07-snap-gene-1229.24	8.43225	49.1802	-2.54898	0.00040947	0.0338	122958030	122962854	2472
maker-LG09-augustus-gene-22.51	46.6849	213.241	-2.19126	0.000413361	0.0339481	2265452	2272802	4898
maker-LG06-augustus-gene-107.72	26.3939	1.14069	4.64443	0.000416704	0.0340498	10707785	10711197	2718
maker-LG06-augustus-gene-199.1	54.6064	5.03327	3.44544	0.000423412	0.034424	19889120	19896690	2033
maker-LG06-augustus-gene-123.49	58.1466	1.14069	5.74958	0.000434855	0.0351776	12310831	12321024	1488
snap_masked-LG06-processed-gene-55.21	12.7569	0	6.11221	0.000441504	0.0355378	5577501	5577986	486
snap_masked-LG01-processed-gene-1784.20	148.451	316.305	-1.09146	0.000445327	0.0356681	178433661	178434383	723
maker-LG02-snap-gene-1846.50	1.70282	25.7178	-3.9428	0.00044893	0.0357795	184761592	184763558	1473
snap_masked-LG01-processed-gene-1673.34	1432.56	3042.69	-1.08667	0.000473597	0.0375604	167296773	167297213	441
augustus_masked-LG08-processed-gene-916.1	36.8983	126.22	-1.77178	0.000513559	0.0405311	91651868	91653157	1290
maker-LG01-snap-gene-1776.10	544.382	179.56	1.60076	0.000523908	0.0411471	177634828	177637349	2058
augustus_masked-LG06-processed-gene-386.10	244.713	2591.52	-3.40427	0.000527857	0.041257	38598784	38599224	441
maker-LG01-snap-gene-1694.76	22.6569	120.079	-2.40142	0.000535398	0.0416452	169460315	169465534	2368
maker-LG06-snap-gene-261.11	334.448	160.022	1.06245	0.000545768	0.0422487	26094722	26096189	1379
augustus_masked-LG03-processed-gene-1554.23	44.2447	125.983	-1.50838	0.000560966	0.0432184	155448365	155449786	1422
maker-LG01-snap-gene-1675.17	812.936	181.031	2.16896	0.000567225	0.0434935	167518031	167519966	1819
snap_masked-LG01-processed-gene-1876.43	11.0174	62.215	-2.49504	0.000581135	0.0443499	187635772	187637059	1200
maker-LG06-snap-gene-78.6	133.204	51.388	1.37831	0.000623103	0.0472601	7829016	7833490	3476
maker-LG06-snap-gene-57.0	221.484	964.65	-2.12287	0.000625111	0.0472601	5701255	5703622	879
maker-Contig2-augustus-gene-2.3	784.969	347.933	1.17456	0.000641801	0.0482963	237948	239245	313
maker-LG09-snap-gene-144.6	115.898	6.68808	4.14917	0.000656099	0.0490306	14444592	14446248	1485
maker-LG06-augustus-gene-75.22	488.261	46.4788	3.3977	0.000657621	0.0490306	7555001	7557942	2294
maker-LG07-snap-gene-448.1	0.679863	16.8473	-4.65659	0.000666669	0.0494773	44789818	44791893	1233
snap_masked-LG01-processed-gene-1547.6	127.177	445.175	-1.80703	0.00067756	0.0500559	154762993	154764799	951
snap_masked-LG01-processed-gene-1810.34	291.769	31.0717	3.24012	0.000692779	0.0509476	181051151	181051690	540
maker-LG03-augustus-gene-107.4	64.709	530.296	-3.03569	0.000702021	0.0513937	10774751	10778235	2423
snap_masked-LG06-processed-gene-109.45	18.5685	138.509	-2.90114	0.000705882	0.0514435	10932425	10936641	3044
maker-LG03-augustus-gene-1487.44	32.5273	161.025	-2.30709	0.000742546	0.0538729	148744218	148746225	1710
maker-LG01-snap-gene-1757.61	159.774	65.9023	1.27909	0.000755788	0.0544142	175690221	175692885	2273
maker-LG05-augustus-gene-1364.5	9.3503	49.2781	-2.39482	0.000756733	0.0544142	136460854	136462215	813
augustus_masked-LG08-processed-gene-1146.7	0	13.3192	-6.18665	0.000760842	0.0544675	114636901	114638254	1034
augustus_masked-LG06-processed-gene-309.27	16.3808	68.9099	-2.07529	0.000778733	0.05546	30979467	30980030	564
augustus_masked-LG02-processed-gene-1277.1	37927	14069.6	1.43068	0.000781561	0.05546	127772626	127773246	621
maker-LG01-augustus-gene-1849.47	67.8344	5.33635	3.63659	0.000824941	0.0582826	184919854	184925570	3187
maker-LG01-snap-gene-1268.0	111.824	301.684	-1.43206	0.000828891	0.0583071	126811967	126816224	1701
augustus_masked-LG03-processed-gene-1573.10	1444.87	658.046	1.13476	0.00085053	0.0595702	157367904	157369598	1577
maker-LG07-snap-gene-1141.14	104.599	21.0121	2.32703	0.000856656	0.0597407	114101488	114101805	214
snap_masked-LG01-processed-gene-1819.27	423.713	1042.97	-1.29945	0.000900387	0.062466	181945665	181950960	1877
augustus_masked-LG06-processed-gene-1278.7	35466.3	12011.9	1.56202	0.000903457	0.062466	127815676	127816284	609
maker-Contig12-snap-gene-1.6	28.2815	0.690723	5.39635	0.000932872	0.0642252	134360	137472	1742
maker-LG07-snap-gene-848.16	67.1777	254.544	-1.9198	0.000940919	0.0645048	84802338	84807040	4213
maker-LG01-snap-gene-1218.2	31.7442	2.11393	3.94564	0.000955691	0.065241	121873497	121875592	584
maker-LG08-snap-gene-1166.17	137.838	334.284	-1.27706	0.000966568	0.0657063	116632866	116633876	654
snap_masked-LG01-processed-gene-1737.37	82.1299	10.0453	3.02067	0.000979013	0.0662738	173758556	173759065	510
maker-LG08-augustus-gene-1154.2	137.06	463.938	-1.75742	0.000993332	0.066963	115422480	115425260	2508
augustus_masked-LG06-processed-gene-345.11	356.155	123.209	1.53004	0.000999347	0.0670686	34508354	34509310	957
maker-LG03-augustus-gene-1532.20	1235.87	473.625	1.38392	0.00100319	0.0670686	153196593	153198174	929
augustus_masked-LG01-processed-gene-1673.5	43.18	11.2486	1.9535	0.00100973	0.0672278	167300929	167304424	2624
maker-LG06-augustus-gene-413.36	312.501	147.883	1.07823	0.00104223	0.0691076	41340632	41348442	3507
maker-LG03-augustus-gene-15.43	108.414	275.302	-1.34426	0.00108003	0.0712956	1500233	1505923	1724
maker-LG05-augustus-gene-146.27	60.566	8.4539	2.8135	0.00108705	0.0712956	14672296	14674584	1904
maker-LG01-augustus-gene-1829.38	149.256	299.897	-1.00489	0.00108845	0.0712956	182941815	182945299	1381
maker-LG01-snap-gene-1757.62	36.6497	8.36043	2.13615	0.00111912	0.0730089	175712294	175713890	1259
maker-LG06-augustus-gene-157.2	18.7079	1.46497	3.75557	0.00119703	0.0777781	15762813	15765280	1214
augustus_masked-LG06-processed-gene-1285.1	7795.6	1254.94	2.63528	0.00121705	0.0787627	128520318	128520911	594
maker-LG07-snap-gene-1226.51	189.684	67.7663	1.48814	0.0012293	0.0792382	122597060	122598441	1142
maker-LG02-snap-gene-1596.30	45.517	8.08929	2.51565	0.00125381	0.0804973	159610449	159613445	1613
maker-LG01-snap-gene-1770.29	16.5823	120.372	-2.85831	0.00133547	0.0854016	177053204	177057507	2227
maker-LG09-snap-gene-124.47	15.7323	82.6221	-2.39099	0.00135927	0.0860051	12438547	12443594	2830
maker-LG06-snap-gene-316.51	264.751	536.524	-1.01817	0.00136237	0.0860051	31669098	31671997	1479
maker-LG01-snap-gene-1108.5	1868.61	411.455	2.1823	0.00136273	0.0860051	110818704	110822302	2020
augustus_masked-LG09-processed-gene-70.61	450.764	10.7056	5.4031	0.00136617	0.0860051	7009020	7009646	627
maker-LG06-augustus-gene-66.7	43.0774	5.14796	3.05412	0.00137474	0.086209	6588219	6593752	3014
maker-LG06-snap-gene-329.20	60.6994	18.2383	1.72375	0.00138728	0.0866596	32923703	32929799	2380
snap_masked-LG09-processed-gene-258.3	1159.51	442.645	1.38912	0.00142068	0.0884047	25883564	25885682	1895
maker-LG01-snap-gene-1961.25	30.9087	154.9	-2.32227	0.00142921	0.0885945	196110431	196112307	1471
maker-LG07-augustus-gene-1221.23	75.9065	216.892	-1.5141	0.00143586	0.0886672	122090716	122093509	909
maker-Contig21-augustus-gene-1.149	548.946	1194.85	-1.12247	0.00147856	0.0908369	242972	246801	1752
snap_masked-LG01-processed-gene-1677.47	43.6543	5.75399	2.90613	0.00148223	0.0908369	167777875	167780009	666
maker-LG01-snap-gene-219.2	28.1929	270.444	-3.2617	0.00150837	0.0919569	21908442	21915716	2717
maker-LG08-snap-gene-1124.2	33.7858	111.163	-1.71647	0.00151399	0.0919569	112450688	112454135	1291
augustus_masked-LG02-processed-gene-1775.41	301.756	66.7937	2.17869	0.00151755	0.0919569	177496337	177497488	1152
snap_masked-LG01-processed-gene-1818.28	418.356	1162.41	-1.47368	0.00153079	0.0924131	181842037	181843041	1005
maker-LG01-snap-gene-1895.18	29.7867	252.83	-3.08489	0.00155407	0.0934692	189530547	189534535	2099
maker-LG01-snap-gene-1881.27	24.5619	1.17185	4.30516	0.00165297	0.0990248	188165859	188168070	1793
maker-LG01-augustus-gene-1859.46	1779.75	992.725	0.84191	0.00165868	0.0990248	185918707	185929754	3967
maker-LG01-augustus-gene-1841.23	234.046	538.626	-1.2028	0.00167142	0.0991315	184151655	184152798	916
maker-LG01-snap-gene-1798.26	31.1833	1.74749	4.18813	0.00167272	0.0991315	179812286	179815282	2023
maker-LG01-augustus-gene-1829.40	267.767	107.528	1.31409	0.00171161	0.101066	182933159	182938425	3548
augustus_masked-LG09-processed-gene-58.9	265.877	64.7101	2.04317	0.00176705	0.103774	5808932	5809402	471
snap_masked-LG01-processed-gene-141.47	25.6825	0.282521	6.15944	0.0017703	0.103774	14123321	14124031	711
augustus_masked-Contig45-processed-gene-0.45	662.603	156.688	2.08063	0.00178978	0.104538	60508	61326	819
maker-LG05-augustus-gene-146.24	74.2276	325.279	-2.13136	0.00179902	0.104699	14606308	14607937	835
maker-LG06-augustus-gene-259.17	0	9.29191	-5.66855	0.00183726	0.106542	25916464	25917659	636
maker-LG02-snap-gene-1830.96	44.9447	351.163	-2.96619	0.00188386	0.108082	183033176	183035555	1737
maker-LG01-snap-gene-1825.15	529.003	234.872	1.17073	0.00188527	0.108082	182574675	182576336	1368
snap_masked-LG08-processed-gene-1161.17	665.077	269.919	1.30138	0.00188625	0.108082	116089022	116097943	3495
maker-LG06-augustus-gene-44.31	269.38	110.681	1.27844	0.00189055	0.108082	4470257	4475623	3687
maker-LG01-snap-gene-1942.33	54.7049	224.163	-2.0355	0.00196269	0.111811	194189094	194195512	1984
maker-LG01-snap-gene-77.19	29.5638	121.399	-2.04017	0.00198486	0.112678	7705341	7705758	283
snap_masked-LG01-processed-gene-1786.16	341.951	78.8294	2.12073	0.00201577	0.114032	178645133	178647187	2055
maker-LG01-snap-gene-1334.2	295.827	110.178	1.42365	0.00202302	0.114044	133464405	133465874	1172
maker-LG06-augustus-gene-37.3	202.925	414.85	-1.03191	0.00206225	0.115851	3756186	3767226	5504
maker-LG01-snap-gene-2002.30	158.094	57.144	1.46619	0.00209643	0.117364	200206164	200209475	2287
snap_masked-LG03-processed-gene-1491.26	236.361	533.506	-1.17334	0.00213001	0.118833	149143826	149147962	2900
maker-LG01-snap-gene-1913.21	523.096	2690.77	-2.36281	0.00215075	0.119104	191339864	191341815	471
maker-LG06-augustus-gene-66.13	630.284	243.658	1.37122	0.00215442	0.119104	6669899	6671886	960
maker-LG08-augustus-gene-1126.11	252.769	73.7477	1.78274	0.00215874	0.119104	112632514	112633757	1050
augustus_masked-LG06-processed-gene-66.26	83.6371	31.5382	1.41229	0.00216433	0.119104	6680319	6681815	1497
maker-Contig16-snap-gene-2.24	153.08	24.5266	2.63873	0.00218763	0.119762	263054	267149	2102
snap_masked-LG05-processed-gene-1362.27	17.9222	1.5379	3.48338	0.0021917	0.119762	136282780	136284861	1857
maker-LG01-snap-gene-1557.27	87.383	284.577	-1.70186	0.00219849	0.119762	155738703	155739870	764
maker-Contig5-snap-gene-4.20	123.348	32.8755	1.9096	0.00221033	0.120003	403901	410919	1938
maker-LG06-augustus-gene-1140.6	616.855	342.302	0.850409	0.00222615	0.120458	114062700	114068014	4561
maker-LG01-snap-gene-2042.66	804.44	1677.28	-1.05966	0.00225432	0.121204	204284707	204288746	2839
maker-LG09-snap-gene-29.66	300.728	134.851	1.15604	0.00225492	0.121204	2910866	2912509	1524
maker-LG01-augustus-gene-1711.69	798.764	348.888	1.19557	0.00226593	0.121392	171142556	171145954	2973
snap_masked-LG01-processed-gene-59.31	65.2783	229.706	-1.81532	0.00233983	0.124634	5920520	5922727	825
augustus_masked-LG08-processed-gene-346.0	8.46696	65.0209	-2.93947	0.00234184	0.124634	34629148	34629636	489
snap_masked-LG01-processed-gene-796.8	115.545	39.7596	1.5387	0.00236785	0.125605	79614090	79620368	4700
maker-LG01-augustus-gene-1967.83	921.57	5592.28	-2.60129	0.00238647	0.126179	196760219	196765029	2036
augustus_masked-LG01-processed-gene-1214.3	86.857	218.051	-1.32665	0.00243628	0.128393	121393930	121394430	501
maker-LG06-augustus-gene-74.0	24.0011	2.38546	3.26982	0.00250912	0.130445	7401785	7403590	1700
maker-LG09-augustus-gene-106.50	2894.78	1550.45	0.900837	0.00251398	0.130445	10627617	10630870	2044
maker-LG06-augustus-gene-421.18	26.9325	102.464	-1.92574	0.00251503	0.130445	42153439	42160968	2757
maker-LG05-snap-gene-122.1	241.309	87.9344	1.46008	0.00252196	0.130445	12282105	12286288	3687
maker-LG06-augustus-gene-428.70	61.4397	335.968	-2.45173	0.00253248	0.130445	42792733	42794650	1596
maker-LG07-snap-gene-267.32	468.803	805.664	-0.780759	0.00254011	0.130445	26738603	26741407	1678
snap_masked-LG01-processed-gene-1882.8	266.243	119.095	1.16533	0.00254319	0.130445	188271008	188275696	1798
maker-Contig21-snap-gene-1.47	79.362	192.49	-1.27477	0.00254608	0.130445	173344	175915	1541
maker-LG01-snap-gene-1902.21	214.277	68.7489	1.64447	0.00254779	0.130445	190192941	190196981	2916
snap_masked-LG05-processed-gene-611.15	46.2909	12.9335	1.83086	0.00256186	0.130752	61097177	61105481	1832
maker-LG07-snap-gene-1151.45	50.185	7.98455	2.64386	0.00257131	0.130822	115120335	115121847	1147
maker-LG01-snap-gene-1735.24	2190.12	742.293	1.5611	0.00260282	0.131519	173550058	173551062	878
snap_masked-Contig13-processed-gene-3.62	48.1792	147.507	-1.61143	0.00260494	0.131519	401826	402437	612
maker-LG06-snap-gene-17.35	249.769	108.349	1.20026	0.00261767	0.131519	1772416	1780678	3222
maker-LG06-augustus-gene-149.13	66.0473	7.51298	3.10396	0.00262282	0.131519	14977423	14983274	1421
augustus_masked-LG03-processed-gene-5.4	1.64405	16.7536	-3.34507	0.00262566	0.131519	564417	564716	300
maker-LG01-snap-gene-275.11	725.5	278.507	1.38282	0.0026575	0.132441	27542899	27545840	1992
snap_masked-LG07-processed-gene-1221.80	60.4138	165.52	-1.45481	0.00266044	0.132441	122126816	122127862	1047
maker-LG06-snap-gene-107.35	20.2426	2.03002	3.3344	0.0027129	0.134638	10683119	10688192	3065
maker-LG05-augustus-gene-31.40	652.142	1136.65	-0.801445	0.00273428	0.134756	3154066	3159957	2447
augustus_masked-LG06-processed-gene-104.58	46.5497	250.721	-2.4288	0.00273527	0.134756	10483246	10483647	402
augustus_masked-LG06-processed-gene-1267.6	76.7863	24.066	1.66358	0.00274187	0.134756	126728812	126729172	361
maker-LG07-augustus-gene-1230.13	105.825	254.613	-1.26523	0.00276038	0.134756	123001210	123002858	754
maker-LG08-snap-gene-14.1	2171.16	689.192	1.65612	0.0027637	0.134756	1466576	1469591	1749
maker-LG05-snap-gene-1356.19	125.835	48.048	1.38509	0.00276526	0.134756	135645028	135646542	750
maker-LG01-augustus-gene-1814.1	1089.07	531.125	1.03634	0.00280923	0.136431	181418980	181420439	1133
maker-Contig2-augustus-gene-0.2	20.6227	1.95709	3.50423	0.00281648	0.136431	39539	46538	2560
maker-LG07-snap-gene-1217.21	1781.01	9462.64	-2.40957	0.00283919	0.136718	121743235	121745768	1144
maker-LG01-snap-gene-1418.6	139.229	333.2	-1.25837	0.00284335	0.136718	141813128	141815100	1348
maker-LG06-augustus-gene-75.25	12.3434	0.408202	5.10104	0.00285346	0.136718	7586233	7588922	1504
maker-LG03-snap-gene-1106.3	33.371	3.86104	3.13625	0.00285622	0.136718	110602134	110603612	1386
maker-LG08-augustus-gene-1173.33	289.302	1648.84	-2.51095	0.00286909	0.136929	117308062	117314558	4307
snap_masked-LG01-processed-gene-1742.20	19.1457	136.306	-2.82957	0.00295219	0.140481	174200926	174202244	1068
maker-LG07-snap-gene-1242.3	5.73147	76.4221	-3.73896	0.00299738	0.142213	124243321	124250160	2964
snap_masked-LG03-processed-gene-1472.30	56.3051	9.76165	2.51306	0.00302524	0.143115	147196583	147196789	207
maker-LG08-augustus-gene-1139.6	2086.46	3787.16	-0.859934	0.00304484	0.143622	113949796	113958054	3520
maker-LG06-augustus-gene-564.15	814.284	1439.76	-0.821929	0.00308976	0.144685	56444324	56452344	2620
maker-LG09-snap-gene-217.6	1258.01	691.63	0.863953	0.00309338	0.144685	21720653	21726769	1386
maker-LG06-augustus-gene-63.35	216.041	455.101	-1.07427	0.00309419	0.144685	6338398	6340383	952
maker-LG01-augustus-gene-1881.52	112.092	35.0952	1.67002	0.00313266	0.145299	188168525	188173261	2711
augustus_masked-LG06-processed-gene-1277.4	1420.84	747.074	0.926536	0.0031327	0.145299	127730234	127730806	573
snap_masked-LG01-processed-gene-827.0	181.658	323.753	-0.833845	0.00314165	0.145299	82687448	82688853	914
maker-LG09-augustus-gene-117.6	0	8.52826	-5.54179	0.00314325	0.145299	11777348	11780421	1967
maker-LG01-snap-gene-961.0	212.671	506.963	-1.25352	0.00315751	0.145542	96112938	96117182	2351
maker-LG08-augustus-gene-992.4	582.01	293.357	0.986915	0.00319958	0.147062	99272636	99278303	2942
maker-LG03-augustus-gene-1552.32	439.086	137.971	1.67342	0.0032176	0.147472	155223735	155226864	1032
snap_masked-LG01-processed-gene-1710.3	29.476	132.37	-2.16465	0.00325917	0.14895	171018858	171020176	1038
maker-LG01-augustus-gene-143.2	13.2595	59.8507	-2.16839	0.00326826	0.14895	14379891	14380950	814
maker-LG01-snap-gene-1865.7	258.214	558.544	-1.1127	0.00328682	0.149375	186545582	186549768	1985
maker-LG09-snap-gene-425.4	788.595	397.427	0.988415	0.00329724	0.149429	42563333	42569551	3661
maker-LG06-snap-gene-71.48	343.337	8058.23	-4.5528	0.0033091	0.149533	7178582	7180357	1215
maker-LG05-snap-gene-1377.22	353.844	690.726	-0.964851	0.0033222	0.149533	137757794	137762073	2257
snap_masked-LG01-processed-gene-141.37	667.998	1107.54	-0.729297	0.00332726	0.149533	14132207	14136130	1991
maker-LG01-snap-gene-1843.5	558.232	1164.9	-1.06149	0.00339332	0.152079	184354978	184358162	1435
maker-LG05-snap-gene-1380.29	464.804	232.94	0.994786	0.00344423	0.153623	138067198	138070402	2260
augustus_masked-LG08-processed-gene-949.31	393.818	110.344	1.83444	0.00344676	0.153623	94961352	94962650	1299
snap_masked-LG01-processed-gene-1807.2	105.45	29.2165	1.85975	0.00348244	0.154787	180749744	180750523	780
maker-LG01-augustus-gene-2032.95	861.679	1922.11	-1.15714	0.0034936	0.154858	203271001	203274422	1860
maker-LG08-augustus-gene-887.1	180.355	38.7939	2.22345	0.00352211	0.155695	88713189	88714551	1161
maker-LG01-augustus-gene-1822.29	175.042	573.971	-1.71246	0.00362312	0.159723	182254985	182260104	3583
augustus_masked-LG09-processed-gene-124.32	5.80408	73.3132	-3.65071	0.00366019	0.160514	12417785	12418015	231
maker-LG09-snap-gene-1076.0	1.02295	32.6532	-5.01191	0.00366089	0.160514	107666010	107668052	1047
maker-LG06-snap-gene-119.89	290.14	766.256	-1.40094	0.00370786	0.162134	11905595	11910542	1685
augustus_masked-LG06-processed-gene-343.16	637.215	1132.3	-0.829336	0.00376313	0.164107	34325626	34338048	3927
maker-LG07-snap-gene-1082.23	1207.98	527.873	1.19471	0.00379	0.164835	108204312	108211184	1970
snap_masked-LG01-processed-gene-2043.12	47.637	104.063	-1.12574	0.00383888	0.166512	204292962	204295619	2658
maker-LG07-snap-gene-1196.19	1084.88	346.813	1.64472	0.00390075	0.168744	119593555	119597990	1814
maker-LG02-snap-gene-171.19	170.36	982.61	-2.52725	0.0039586	0.170331	17180090	17182647	2082
maker-LG01-augustus-gene-1547.20	15.936	74.0098	-2.21401	0.00396446	0.170331	154765201	154767113	1098
maker-LG02-snap-gene-1446.0	139.022	54.0723	1.35706	0.00396903	0.170331	144592518	144595156	1824
maker-LG01-snap-gene-1720.27	27.0289	160.443	-2.57043	0.00408021	0.174294	172008045	172012135	2246
maker-LG05-snap-gene-963.3	888.601	1935.41	-1.12287	0.00408468	0.174294	96351570	96352899	890
maker-LG01-snap-gene-1982.10	19.4035	59.3525	-1.61643	0.00409711	0.174294	198241564	198242101	341
maker-LG01-snap-gene-1599.26	195.295	732.684	-1.90736	0.00410446	0.174294	159905281	159909240	2549
augustus_masked-LG03-processed-gene-1583.64	14.297	1.42321	3.38705	0.00411985	0.17449	158283269	158284600	1332
maker-Contig3-snap-gene-5.47	16.9402	0.93109	4.1333	0.00414655	0.175162	606572	611017	1814
maker-Contig12-snap-gene-1.5	16.5388	0	6.48578	0.0041599	0.175268	178897	182206	2077
maker-LG01-snap-gene-1684.37	30.2687	4.5943	2.74947	0.00417974	0.175647	168455682	168457949	1948
maker-LG03-augustus-gene-1570.1	71.7805	527.072	-2.8766	0.00420203	0.175747	157055426	157060175	2218
maker-LG06-augustus-gene-1275.35	42.607	176.269	-2.04738	0.00420386	0.175747	127564058	127569696	3341
maker-LG01-augustus-gene-1881.42	8.59685	0	5.54185	0.00422111	0.176014	188159010	188162760	1888
maker-LG06-augustus-gene-77.33	369.125	134.931	1.4546	0.00424976	0.176753	7782203	7784877	1590
snap_masked-LG02-processed-gene-1769.13	3.30485	30.3921	-3.19454	0.0042701	0.177144	176937766	176939274	1509
snap_masked-LG09-processed-gene-21.26	25.3817	3.23302	2.91087	0.00428551	0.17725	2091477	2094190	1533
augustus_masked-Contig20-processed-gene-1.66	137.831	256.849	-0.896781	0.00430123	0.17725	264351	265743	583
maker-LG01-augustus-gene-1838.10	506.456	2155.91	-2.08984	0.00431463	0.17725	183884788	183889099	2380
maker-LG01-snap-gene-1763.3	317.639	168.156	0.917144	0.00431649	0.17725	176336795	176338462	1572
maker-LG09-augustus-gene-1060.4	28.2869	7.38758	1.94418	0.00436292	0.178703	106031930	106034646	1956
snap_masked-LG07-processed-gene-1124.24	11.8104	66.2529	-2.48842	0.00440003	0.179768	112412815	112414373	1179
maker-LG05-snap-gene-206.10	28.5848	277.471	-3.28015	0.00443688	0.180817	20602875	20610042	4366
augustus_masked-LG05-processed-gene-1202.5	1.02295	13.1423	-3.71001	0.00445217	0.180984	120246157	120246561	405
maker-LG01-augustus-gene-1888.51	2057.22	4691.58	-1.18942	0.00446826	0.181183	188833793	188837257	2962
maker-LG07-augustus-gene-1119.0	225.84	631.182	-1.48184	0.00448097	0.181244	111925149	111927347	1199
maker-LG05-snap-gene-1366.20	54.594	230.02	-2.07594	0.00451636	0.18222	136617866	136621920	2670
maker-LG06-snap-gene-83.15	77.9914	213.328	-1.45151	0.00457656	0.184189	8299800	8303679	2266
snap_masked-LG01-processed-gene-1716.3	61.6824	6.46682	3.22728	0.00460035	0.184687	171625888	171628074	1169
augustus_masked-LG08-processed-gene-1132.41	867.064	437.212	0.988868	0.00464942	0.185472	113278588	113285504	3847
maker-LG01-snap-gene-1818.1	644.597	1362.59	-1.08023	0.00465399	0.185472	181821407	181825311	2260
maker-LG01-snap-gene-1688.30	7.39474	43.5106	-2.56069	0.00465429	0.185472	168847138	168850987	1261
maker-LG01-snap-gene-1652.0	134.759	13.0936	3.38267	0.00468606	0.18628	165282063	165283754	1470
maker-LG06-snap-gene-21.52	755.294	337.68	1.16102	0.00469942	0.186353	2141043	2146061	3025
augustus_masked-LG06-processed-gene-57.39	341.661	152.453	1.16305	0.00479136	0.189277	5763315	5766008	2694
maker-LG08-snap-gene-1127.73	183.539	54.6339	1.74935	0.00479655	0.189277	112772429	112777335	2494
augustus_masked-LG06-processed-gene-1294.20	74.7006	21.4375	1.79228	0.00483245	0.190229	129438781	129442093	1716
maker-Contig29-snap-gene-1.11	15.4693	0	6.39017	0.00487998	0.191634	180011	181248	716
snap_masked-LG06-processed-gene-78.90	81.2695	196.918	-1.27339	0.00489501	0.191759	7841980	7844461	841
maker-LG01-snap-gene-1826.2	21.4598	76.7988	-1.83952	0.00493036	0.192677	182647459	182651585	3040
maker-LG01-augustus-gene-23.31	918.984	2336.59	-1.34603	0.00497377	0.193739	2310251	2314314	2891
maker-LG08-snap-gene-1150.1	22.823	132.057	-2.53341	0.00498149	0.193739	115001578	115002443	803
maker-LG03-augustus-gene-1547.47	1109.13	636.295	0.801214	0.00503023	0.195166	154744793	154748281	2102
snap_masked-LG09-processed-gene-315.1	1089.81	611.225	0.835146	0.00516139	0.199775	31491669	31493798	1916
maker-LG05-augustus-gene-1064.2	2044.24	5126.7	-1.32633	0.00520187	0.200862	106471141	106473108	1432
snap_masked-LG07-processed-gene-1222.83	1097.83	688.245	0.673285	0.0052756	0.203224	122277781	122281183	2169
snap_masked-LG01-processed-gene-40.22	295.326	575.349	-0.961228	0.0053121	0.204144	4026498	4032211	2290
maker-LG01-snap-gene-649.2	984.214	479.02	1.03997	0.00535313	0.205004	64931816	64934996	1695
snap_masked-Contig9-processed-gene-3.31	78.2683	14.9638	2.39983	0.00535982	0.205004	376937	377764	828
maker-LG01-snap-gene-709.19	6.92149	33.1	-2.25249	0.00540771	0.206348	70921737	70922937	753
augustus_masked-LG09-processed-gene-768.6	333.249	746.607	-1.16375	0.00544676	0.207348	76861800	76868702	5363
augustus_masked-LG06-processed-gene-22.7	302.521	961.375	-1.66811	0.00550696	0.209148	2211458	2216589	3009
maker-LG07-snap-gene-1223.27	39.2206	94.6329	-1.27409	0.00556196	0.210315	122354348	122356669	1342
maker-Contig23-augustus-gene-1.9	2.24209	32.6431	-3.84694	0.00557189	0.210315	149769	156976	3252
augustus_masked-LG05-processed-gene-1347.23	24.9616	122.552	-2.29589	0.00557669	0.210315	134697997	134699687	1551
augustus_masked-LG03-processed-gene-779.0	143.054	22.841	2.64094	0.00559752	0.21061	77897943	77898676	455
augustus_masked-LG03-processed-gene-1488.51	305.908	517.804	-0.759173	0.00561779	0.210882	148818571	148819608	1038
maker-LG06-snap-gene-79.13	0.336774	18.9835	-5.733	0.00564251	0.211276	7912197	7913731	822
maker-LG05-snap-gene-315.2	398.827	764.032	-0.936829	0.0056544	0.211276	31485412	31496157	1847
maker-LG06-augustus-gene-58.10	209.656	109.412	0.937949	0.0056695	0.211352	5823389	5827086	1766
maker-LG06-augustus-gene-238.14	4.02673	22.0356	-2.46701	0.00572857	0.213063	23785868	23788384	1563
maker-LG06-augustus-gene-132.1	406.267	184.436	1.14147	0.00575235	0.213457	13199585	13204985	3258
maker-Contig29-snap-gene-1.7	97.4419	211.155	-1.11421	0.00582344	0.215455	157810	159307	777
maker-LG05-augustus-gene-207.14	217.257	821.795	-1.9187	0.00583282	0.215455	20707191	20709277	1199
maker-LG06-augustus-gene-309.8	68.7628	4.23781	3.98619	0.00584858	0.215545	30943962	30945817	1524
snap_masked-LG09-processed-gene-1049.2	1069.92	534.76	1.00149	0.00587389	0.215895	104920197	104921621	1425
maker-LG06-snap-gene-133.16	156.522	770.663	-2.29979	0.00588476	0.215895	13291514	13294218	1392
maker-LG06-snap-gene-1196.4	130.61	308.612	-1.23929	0.00589815	0.215896	119619133	119621469	1258
maker-LG01-snap-gene-164.5	33.2948	85.626	-1.36347	0.00595475	0.217476	16468020	16471743	1865
snap_masked-LG07-processed-gene-800.13	34.4571	9.35422	1.85553	0.0060277	0.219645	80077096	80077830	735
augustus_masked-LG01-processed-gene-2044.48	68.5235	14.4842	2.2618	0.00604737	0.219866	204453843	204457510	2035
snap_masked-LG01-processed-gene-2041.80	900.672	2926.17	-1.69999	0.00607878	0.220102	204137046	204139339	1431
augustus_masked-Contig2-processed-gene-1.52	1650.7	579.62	1.51019	0.00608106	0.220102	132288	134303	2016
snap_masked-LG05-processed-gene-128.9	913.604	455.835	1.00213	0.00609978	0.220287	12866677	12867282	606
maker-Contig37-snap-gene-0.33	43.9107	10.6624	2.03533	0.00615422	0.221758	15612	19886	1808
maker-LG05-snap-gene-1394.2	59.9275	168.733	-1.4936	0.00617939	0.22217	139407372	139411145	2365
snap_masked-LG05-processed-gene-410.2	345.908	864.507	-1.3209	0.00620751	0.222686	41022819	41024930	1884
maker-LG01-snap-gene-1907.5	13.9666	69.2647	-2.30675	0.00626562	0.224125	190754089	190754806	327
maker-LG02-snap-gene-1834.79	2048.29	4175.54	-1.02739	0.00627533	0.224125	183442410	183443124	420
maker-LG06-augustus-gene-45.82	216.862	473.144	-1.12621	0.00635114	0.226333	4497342	4501047	2363
maker-LG01-snap-gene-1931.12	194.205	471.846	-1.2799	0.00640496	0.227379	193101722	193103499	1061
maker-LG06-augustus-gene-417.35	398.658	227.109	0.813149	0.0064086	0.227379	41752970	41756170	2734
snap_masked-LG02-processed-gene-1798.59	66.0285	312.925	-2.24405	0.00642537	0.227475	179884458	179887504	1427
augustus_masked-LG06-processed-gene-1229.22	103.159	17.9645	2.51878	0.00647086	0.228585	122936672	122939155	1609
maker-LG06-augustus-gene-200.2	0.673547	14.8909	-4.47338	0.00653301	0.230278	20029139	20031494	1930
maker-LG01-augustus-gene-1595.100	101.065	45.5053	1.14848	0.00658091	0.231462	159536086	159540766	3477
maker-LG03-augustus-gene-139.4	36.1461	8.29706	2.09541	0.00664728	0.233289	13886683	13890936	3696
snap_masked-Contig21-processed-gene-1.115	453.796	151.166	1.58706	0.00668125	0.23347	206219	207676	1458
maker-LG09-snap-gene-137.50	1772.63	951.191	0.89855	0.00668128	0.23347	13730155	13738750	4283
maker-LG06-snap-gene-1295.10	91.9519	186.799	-1.0237	0.00672916	0.234636	129570371	129577278	4715
maker-LG01-snap-gene-1820.58	0.336774	8.88371	-4.6431	0.00686559	0.238878	182033012	182035390	1532
snap_masked-LG06-processed-gene-113.10	124.335	737.201	-2.568	0.00689865	0.239505	11339268	11343599	2403
maker-LG06-augustus-gene-348.2	53.1497	162.862	-1.61494	0.0069132	0.239505	34868548	34871084	2206
maker-LG07-snap-gene-1188.51	60.1819	136.951	-1.18841	0.00693744	0.239831	118861431	118863715	1825
maker-LG02-snap-gene-188.0	440.155	1063.59	-1.27292	0.0070114	0.241871	18793344	18800251	1937
snap_masked-LG05-processed-gene-411.2	295.019	749.518	-1.34436	0.0070334	0.242114	41109347	41111749	2175
maker-LG03-snap-gene-1466.14	944.985	439.216	1.10423	0.00705096	0.242203	146665128	146680485	3323
maker-LG01-snap-gene-103.7	18.5704	77.5447	-2.06491	0.0070811	0.242723	10298823	10300329	796
maker-LG02-augustus-gene-1755.8	136.747	617.98	-2.17576	0.0072319	0.247368	175543395	175547449	1534
maker-LG06-snap-gene-61.35	115.084	21.2562	2.45061	0.00727889	0.247966	6156626	6169304	3368
maker-LG08-augustus-gene-1129.9	25.3377	115.1	-2.17881	0.00728944	0.247966	112980859	112982267	1151
augustus_masked-LG03-processed-gene-1551.1	9.63655	0.408202	4.74423	0.00729538	0.247966	155175315	155176807	1322
augustus_masked-LG08-processed-gene-790.2	7.78079	58.73	-2.91048	0.00739989	0.250991	79025706	79026146	441
maker-LG08-augustus-gene-1134.49	5564.2	1281.96	2.11796	0.00759764	0.25716	113459658	113461913	2129
maker-LG09-augustus-gene-190.4	55.6021	199.158	-1.83877	0.00765671	0.257797	19044636	19046269	1545
snap_masked-LG07-processed-gene-1213.7	392.992	220.634	0.832517	0.00768175	0.257797	121302675	121303749	985
augustus_masked-LG01-processed-gene-107.0	15.064	57.6833	-1.92827	0.0076901	0.257797	10688796	10690331	1536
maker-LG01-snap-gene-1861.36	173.073	66.564	1.38448	0.00769207	0.257797	186166434	186167890	1373
maker-LG03-augustus-gene-433.0	17073	6959.11	1.2947	0.00769873	0.257797	43322368	43325419	1924
maker-LG01-augustus-gene-45.12	1321.79	320.54	2.04508	0.00771209	0.257797	4537276	4540342	1955
augustus_masked-LG09-processed-gene-368.10	567.411	162.283	1.80865	0.00777295	0.259296	36820925	36821275	351
snap_masked-LG08-processed-gene-1159.10	6.28776	27.1012	-2.11455	0.00781875	0.259914	115934259	115939265	2380
snap_masked-Contig8-processed-gene-2.54	675.706	313.347	1.10777	0.0078236	0.259914	265268	265927	660
maker-LG01-snap-gene-1770.28	649.431	338.287	0.941901	0.00786583	0.260648	177046204	177048527	1262
maker-LG01-snap-gene-1787.38	581.931	258.999	1.16613	0.00787792	0.260648	178761485	178764689	1323
maker-LG02-snap-gene-1840.49	49.1544	8.64334	2.51024	0.0079355	0.260998	184001303	184005220	2742
snap_masked-LG09-processed-gene-403.2	4.78744	320.433	-6.06194	0.00794242	0.260998	40298985	40300140	1035
maker-Contig2-snap-gene-0.39	7.66643	0	5.37582	0.00794912	0.260998	25184	27008	677
maker-LG06-augustus-gene-859.8	128.259	284.904	-1.15231	0.00795302	0.260998	85939566	85941898	369
maker-LG09-snap-gene-80.0	1.01664	26.9328	-4.74406	0.00800694	0.262021	8066130	8066761	558
snap_masked-LG06-processed-gene-1337.19	15.2173	53.6856	-1.81165	0.0080166	0.262021	133780795	133783290	1064
maker-LG01-augustus-gene-1818.66	0.343089	8.55942	-4.58927	0.00807643	0.263445	181885296	181886275	477
snap_masked-LG01-processed-gene-269.17	1.36604	16.5625	-3.61861	0.00813242	0.264737	26890028	26890606	579
snap_masked-LG06-processed-gene-177.31	145.234	264.602	-0.866082	0.00817968	0.265477	17717326	17721021	1170
snap_masked-Contig10-processed-gene-0.7	110.889	48.9677	1.17352	0.00819794	0.265477	1609	4006	1875
augustus_masked-LG05-processed-gene-139.20	601.205	1024.34	-0.76917	0.00820874	0.265477	13935780	13937852	1867
snap_masked-LG01-processed-gene-1855.41	233.266	883.208	-1.92012	0.00822078	0.265477	185512193	185514975	1839
maker-LG01-snap-gene-1886.16	14.8183	0.648569	4.48968	0.00829005	0.266892	188627432	188628634	1051
maker-LG03-augustus-gene-1570.3	107.938	196.476	-0.864412	0.0082976	0.266892	157069486	157073182	1143
maker-LG01-snap-gene-46.42	2.7005	22.3192	-3.05571	0.00833684	0.267513	4600855	4604629	2420
maker-LG06-snap-gene-54.35	134.894	51.0871	1.40843	0.00834997	0.267513	5407218	5411109	2031
maker-LG07-snap-gene-779.10	52.7308	287.359	-2.44613	0.00838241	0.268022	77938856	77940864	1922
augustus_masked-LG09-processed-gene-51.29	265.444	132.231	1.00614	0.00851553	0.271741	5127800	5128318	519
maker-LG01-augustus-gene-1712.1	11.9585	41.1893	-1.78065	0.00854984	0.272299	171235286	171235670	296
maker-LG08-augustus-gene-1191.3	13.5596	49.1889	-1.85163	0.00865115	0.274984	119114919	119117953	926
augustus_masked-LG03-processed-gene-27.18	22.8633	94.9045	-2.05338	0.00866824	0.274987	2760387	2761133	747
maker-LG02-snap-gene-253.17	11873.5	3526.31	1.75164	0.00869943	0.275425	25334571	25335385	732
maker-LG02-snap-gene-1838.43	103.292	29.7907	1.79555	0.0087161	0.275425	183807612	183809679	1693
maker-LG03-snap-gene-1336.9	449.18	930.325	-1.05097	0.00875701	0.276179	133647407	133653205	2078
augustus_masked-LG09-processed-gene-78.39	22.3147	1.33929	4.06451	0.00880499	0.277152	7877092	7878696	1605
maker-LG01-snap-gene-1525.10	262.158	586.727	-1.16269	0.00882238	0.27716	152502078	152505306	1903
augustus_masked-LG03-processed-gene-15.12	44.7194	134.037	-1.58475	0.0088943	0.278878	1494662	1500324	2487
maker-LG06-augustus-gene-1140.5	2322.67	3872.33	-0.737315	0.0089538	0.2802	114056748	114058439	911
maker-LG06-snap-gene-66.45	62.2499	123.119	-0.984512	0.00897261	0.280247	6594592	6598063	2136
maker-LG05-snap-gene-78.32	54.9892	16.8344	1.70531	0.00903432	0.280721	7863806	7864331	345
maker-LG09-augustus-gene-142.3	1.02927	16.3752	-4.0122	0.00904061	0.280721	14263428	14264932	1058
maker-LG01-snap-gene-1694.83	0.343089	12.1562	-5.09818	0.00907554	0.280721	169485321	169487201	1736
maker-LG01-augustus-gene-7.22	1111.38	641.276	0.793466	0.00908343	0.280721	690728	697175	3405
maker-LG01-snap-gene-1668.1	63.066	127.546	-1.01377	0.00908663	0.280721	166813810	166814568	291
maker-LG01-augustus-gene-851.0	42.303	88.6498	-1.06705	0.00909191	0.280721	85089310	85089908	538
maker-LG03-augustus-gene-32.6	21.289	71.1338	-1.7442	0.00919801	0.282908	3261631	3263519	1312
maker-LG06-augustus-gene-323.18	55.0497	17.2339	1.67263	0.00920747	0.282908	32292374	32298429	2471
snap_masked-LG01-processed-gene-1817.26	0.686179	15.028	-4.47153	0.00922342	0.282908	181742967	181743821	855
maker-LG01-snap-gene-1855.19	0.627415	16.1387	-4.63718	0.00923546	0.282908	185507811	185510738	1656
maker-LG02-snap-gene-1803.16	59.8099	8.07763	2.86122	0.00925015	0.282908	180289332	180291919	1513
maker-Contig9-snap-gene-4.24	132.214	26.4191	2.31937	0.0093483	0.28528	432704	437616	2597
maker-LG05-augustus-gene-93.23	539.908	1960.4	-1.86042	0.00936297	0.28528	9290203	9292648	1651
maker-Contig2-snap-gene-5.7	1.97039	20.2247	-3.36343	0.00938349	0.285367	551629	553448	1089
maker-LG01-snap-gene-1803.34	463.216	253.179	0.872344	0.0094083	0.285477	180320487	180322396	1517
maker-LG06-augustus-gene-33.25	4.32369	21.5464	-2.31039	0.00942239	0.285477	3385261	3386840	1075
maker-LG06-snap-gene-1118.22	5.42435	33.7257	-2.64101	0.00947973	0.286336	111873247	111873707	364
snap_masked-LG07-processed-gene-1218.26	179.779	80.9044	1.15393	0.00948613	0.286336	121863848	121869610	3724
snap_masked-LG01-processed-gene-12.19	244.254	421.918	-0.788692	0.00958068	0.286937	1264189	1266314	942
maker-LG07-snap-gene-900.0	84.2929	24.2869	1.80014	0.00958517	0.286937	89993567	89994085	345
maker-LG06-snap-gene-83.22	22.3701	0.648569	5.08835	0.00959377	0.286937	8312275	8315354	2232
maker-LG01-snap-gene-1907.2	262.637	585.386	-1.15505	0.00959771	0.286937	190698002	190701294	1334
augustus_masked-LG06-processed-gene-1152.7	83.9546	35.4297	1.23789	0.00962283	0.286937	115191711	115194014	1043
snap_masked-LG08-processed-gene-1150.60	182.105	678.333	-1.89723	0.00963188	0.286937	115003107	115005647	1464
snap_masked-LG06-processed-gene-118.62	415.518	94.3386	2.14228	0.00965929	0.286937	11829868	11833569	2824
maker-LG01-snap-gene-1820.52	1437.94	780.965	0.881037	0.00966528	0.286937	182067356	182071106	2495
snap_masked-LG06-processed-gene-428.9	1.56854	30.1441	-4.24697	0.00966567	0.286937	42831567	42832681	549
snap_masked-LG05-processed-gene-1279.13	112.052	254.867	-1.1856	0.00973661	0.288103	127984501	127986680	618
maker-LG06-snap-gene-1099.7	181.461	372.369	-1.03616	0.00974055	0.288103	109934083	109936061	357
maker-LG01-snap-gene-1815.23	22.0004	94.908	-2.10722	0.00976727	0.288366	181554468	181555371	519
maker-LG09-snap-gene-180.3	112.858	36.1719	1.64353	0.0098225	0.288966	18071285	18076586	1176
maker-LG06-augustus-gene-47.29	225.539	126.378	0.834033	0.00982331	0.288966	4717827	4719828	1158
maker-Contig29-snap-gene-1.9	185.337	98.6186	0.911906	0.00986732	0.289734	172987	176387	2636
augustus_masked-LG07-processed-gene-1218.47	2536.45	1028.93	1.30181	0.00995658	0.291825	121878720	121881065	2346
maker-LG03-snap-gene-100.55	33.2307	7.95145	2.06172	0.0100059	0.292742	10077046	10083419	3105
snap_masked-LG01-processed-gene-1785.43	174.402	67.5031	1.37358	0.0100515	0.293543	178513616	178514731	1116
augustus_masked-LG08-processed-gene-1155.61	11.352	0.889326	3.58054	0.0101732	0.296562	115540389	115541549	1161
maker-LG06-augustus-gene-353.0	14.1229	75.6683	-2.42196	0.0102429	0.298012	35377020	35377763	644
maker-LG09-snap-gene-105.37	228.658	126.156	0.860301	0.0102771	0.298012	10570118	10574089	630
snap_masked-LG07-processed-gene-472.2	56.8989	17.3688	1.69598	0.0102782	0.298012	47230737	47231069	333
maker-LG01-snap-gene-46.49	99.3033	207.927	-1.06501	0.0103151	0.298114	4618167	4623270	3019
snap_masked-LG06-processed-gene-78.76	115.934	30.2305	1.93568	0.0103186	0.298114	7810331	7812700	1265
maker-LG07-snap-gene-1180.40	617.705	369.435	0.74122	0.0104487	0.300231	118007689	118016859	4443
maker-LG01-snap-gene-1964.18	142.325	565.18	-1.98958	0.0104492	0.300231	196421549	196424145	1420
maker-LG02-snap-gene-1826.8	342.837	982.184	-1.51859	0.0104626	0.300231	182597122	182599863	748
maker-LG07-snap-gene-215.8	690.795	397.297	0.797246	0.0104661	0.300231	21551340	21560630	4187
snap_masked-LG01-processed-gene-2008.22	140.135	38.9876	1.83621	0.0106359	0.304384	200832373	200832768	396
augustus_masked-LG06-processed-gene-174.29	6.65392	0	5.17157	0.0106485	0.304384	17433407	17434054	648
snap_masked-LG01-processed-gene-1691.65	2079.58	943.155	1.14102	0.0106814	0.304786	169177580	169180169	1940
snap_masked-LG01-processed-gene-1738.19	5.63097	25.8214	-2.20175	0.0107793	0.306608	173827246	173827863	384
maker-LG03-augustus-gene-1489.45	131.456	62.2039	1.07226	0.0107937	0.306608	148914106	148919127	2791
maker-LG01-snap-gene-935.15	363.508	997.15	-1.45582	0.0108087	0.306608	93489726	93494218	1620
maker-LG06-snap-gene-1321.17	1319.57	2230.67	-0.757561	0.010821	0.306608	132147834	132149689	774
maker-LG01-augustus-gene-1788.65	1331.09	2161.64	-0.699293	0.0108843	0.307862	178850002	178863333	5582
maker-LG08-augustus-gene-1124.17	945.67	342.824	1.4653	0.0109193	0.308312	112460620	112464331	2478
maker-LG01-augustus-gene-1761.25	305.366	114.579	1.41068	0.0110332	0.310126	176100172	176105223	2520
maker-LG01-snap-gene-1793.34	20.6647	55.2375	-1.42512	0.0110357	0.310126	179312294	179314506	1128
maker-Contig25-snap-gene-0.24	31.925	153.527	-2.26729	0.0110515	0.310126	60158	62047	1515
augustus_masked-LG06-processed-gene-1301.8	143.677	66.748	1.10408	0.0110602	0.310126	130166627	130167091	465
snap_masked-LG01-processed-gene-2032.31	482.195	1483.02	-1.62093	0.0110981	0.310458	203202626	203207443	3632
maker-LG09-augustus-gene-77.1	41.0965	132.327	-1.68901	0.0111448	0.310458	7719560	7722282	1385
maker-LG09-augustus-gene-297.7	2288.21	6218.5	-1.44227	0.0111478	0.310458	29720006	29722335	1632
maker-LG09-augustus-gene-24.13	70.6037	21.0554	1.75723	0.0111488	0.310458	2435758	2444438	1960
maker-LG08-augustus-gene-1150.26	86.7278	183.862	-1.08302	0.0112283	0.312134	115021359	115023911	1743
maker-LG07-snap-gene-1169.13	1.67975	19.1517	-3.5092	0.0112555	0.312356	116922613	116924898	1563
maker-LG01-augustus-gene-1668.26	118.418	211.15	-0.833448	0.011299	0.313026	166830551	166833732	1656
maker-LG01-snap-gene-1690.31	127.777	228.313	-0.837619	0.0113417	0.313671	169063002	169066387	1316
augustus_masked-LG09-processed-gene-802.1	95.3607	23.6505	2.01919	0.0114179	0.315239	80235166	80235414	249
maker-LG07-snap-gene-1191.63	260.36	584.625	-1.16618	0.0114566	0.315768	119141260	119144660	1857
maker-LG01-augustus-gene-2007.42	95.3834	36.2911	1.40346	0.0115606	0.317778	200737400	200741805	2067
maker-LG06-snap-gene-980.0	322.971	739.041	-1.19395	0.0115794	0.317778	98036365	98037378	866
maker-LG01-augustus-gene-1675.32	83.5174	281.419	-1.75066	0.0115884	0.317778	167546547	167548615	918
maker-Contig3-snap-gene-2.46	29.8419	7.35681	2.04225	0.0116824	0.319251	215766	221086	2854
maker-Contig29-snap-gene-1.3	16.3976	2.83542	2.49925	0.0116976	0.319251	138989	142744	2010
maker-LG08-augustus-gene-1160.6	156.37	253.211	-0.69525	0.0117398	0.319251	116053851	116056589	2244
maker-LG09-augustus-gene-755.1	1129.19	516.478	1.12874	0.0117438	0.319251	75578008	75581922	3791
maker-LG03-augustus-gene-754.6	106.753	641.917	-2.58792	0.0117465	0.319251	75395410	75400921	2997
maker-LG06-snap-gene-154.44	11.0531	0.648569	4.06553	0.011781	0.319251	15469234	15476355	3048
maker-LG09-augustus-gene-62.19	121.141	492.942	-2.02482	0.0118055	0.319251	6226730	6228949	2050
maker-LG07-augustus-gene-1191.58	116.208	527.634	-2.1827	0.0118278	0.319251	119170517	119176396	2032
augustus_masked-LG08-processed-gene-70.1	195.636	98.1211	0.999823	0.0118516	0.319251	7086979	7087953	975
augustus_masked-LG08-processed-gene-1159.38	101.606	42.5636	1.25057	0.011869	0.319251	115924315	115925403	1089
maker-LG06-snap-gene-208.33	27.1194	1.45437	4.16576	0.0118901	0.319251	20883824	20888023	2054
maker-LG09-augustus-gene-181.8	272.495	168.886	0.689752	0.0118905	0.319251	18085856	18092156	4914
maker-LG02-snap-gene-1767.32	63.8561	134.828	-1.08151	0.0119047	0.319251	176746764	176750087	507
maker-Contig12-augustus-gene-2.28	42.2747	4.64707	3.22586	0.0119549	0.319251	192442	195000	1693
maker-LG05-augustus-gene-1234.11	222.737	90.3	1.30579	0.0119579	0.319251	123454667	123460390	3225
augustus_masked-LG03-processed-gene-47.32	449.762	240.847	0.902921	0.0119599	0.319251	4738442	4740851	2221
maker-LG06-snap-gene-328.14	18.0305	0.648569	4.77512	0.0119776	0.319251	32868611	32873251	1127
maker-LG05-augustus-gene-1344.0	16.5966	104.803	-2.65967	0.0120562	0.320818	134482942	134484582	1553
maker-LG02-snap-gene-432.1	905.221	3609.66	-1.99555	0.012112	0.321103	43197659	43202161	4131
snap_masked-LG09-processed-gene-595.3	1458.17	2294.49	-0.654176	0.0121205	0.321103	59528390	59535624	3158
snap_masked-LG01-processed-gene-76.37	54.7661	5.45247	3.34728	0.0121479	0.321103	7631494	7634500	2338
snap_masked-LG07-processed-gene-1223.56	505.014	230.964	1.13117	0.012148	0.321103	122306746	122307495	750
maker-LG01-snap-gene-1704.8	519.801	1963.49	-1.91743	0.0121853	0.321103	170413327	170420960	2254
maker-LG02-augustus-gene-1829.86	0.686179	11.3739	-4.07676	0.012186	0.321103	182979408	182980030	450
maker-LG08-snap-gene-1076.6	596.178	313.393	0.928437	0.0122328	0.321811	107670850	107683792	2603
snap_masked-LG06-processed-gene-1078.9	9.11623	0.408202	4.66263	0.0123813	0.32519	107863342	107864902	1009
snap_masked-LG02-processed-gene-1621.2	241.142	493.976	-1.03434	0.0124685	0.326611	162138299	162140052	840
maker-LG01-augustus-gene-410.25	12.8848	1.46497	3.20532	0.0124758	0.326611	41075018	41077521	1477
maker-LG06-augustus-gene-424.60	168.701	881.014	-2.38485	0.0125108	0.327	42455946	42458523	1477
maker-LG01-augustus-gene-1813.61	408.634	641.481	-0.650211	0.0125506	0.327044	181366629	181375787	2582
maker-LG03-snap-gene-809.2	1117.46	599.204	0.900297	0.0125529	0.327044	80891644	80895012	1147
maker-LG06-augustus-gene-59.13	806.789	375.713	1.10343	0.0126024	0.327473	5969887	5973533	1986
maker-LG06-snap-gene-48.58	1027.44	2264.08	-1.1396	0.0126099	0.327473	4877282	4879089	847
snap_masked-LG06-processed-gene-75.8	0.343089	8.17282	-4.51284	0.012744	0.330044	7537535	7540287	2020
maker-Contig6-snap-gene-5.62	124.215	331.24	-1.41588	0.0127585	0.330044	503495	504954	631
maker-LG01-augustus-gene-820.20	123.496	228.27	-0.886625	0.0127701	0.330044	81991979	81993597	1476
snap_masked-LG01-processed-gene-988.11	283.754	94.8861	1.58237	0.0127957	0.330179	98804400	98804849	450
augustus_masked-LG06-processed-gene-378.16	279.55	1045.4	-1.90292	0.0128611	0.330651	37799560	37801089	776
maker-LG01-augustus-gene-2000.49	72.62	142.054	-0.970729	0.0128812	0.330651	200038841	200045232	3108
snap_masked-Contig2-processed-gene-5.66	1236.5	660.578	0.904512	0.0128951	0.330651	500937	501509	573
maker-LG06-snap-gene-350.42	175.863	74.0272	1.24221	0.0128958	0.330651	35010160	35011618	384
maker-LG03-augustus-gene-1530.51	70.7924	150.751	-1.08742	0.013048	0.334024	153063547	153064712	868
maker-LG09-augustus-gene-300.2	242.329	732.168	-1.59484	0.0131726	0.336681	30081802	30083574	630
snap_masked-LG06-processed-gene-94.28	13.5849	75.4211	-2.46635	0.0132058	0.336999	9464238	9469338	3566
maker-LG03-augustus-gene-1477.38	103.783	192.276	-0.887081	0.0133966	0.341328	147696262	147699020	1536
maker-LG06-augustus-gene-259.22	454.26	186.285	1.28872	0.0135001	0.342845	25976859	25979923	2226
maker-LG01-snap-gene-1750.69	44.1913	115.999	-1.39458	0.0135434	0.342845	175030651	175035546	2999
maker-LG06-snap-gene-198.24	544.064	969.863	-0.833982	0.0135578	0.342845	19830880	19834428	1510
snap_masked-LG01-processed-gene-1930.17	221.329	445.545	-1.00959	0.0135603	0.342845	193018572	193027228	565
maker-LG01-snap-gene-1606.18	70.9259	25.8776	1.45213	0.0135621	0.342845	160669357	160672331	1743
augustus_masked-LG03-processed-gene-1175.0	3.05211	21.2331	-2.80184	0.0136135	0.343609	117568664	117568999	336
snap_masked-LG01-processed-gene-1659.40	10.3584	70.6342	-2.77215	0.0136583	0.344203	165892043	165893008	966
maker-LG02-snap-gene-27.4	4953.1	2515.06	0.977528	0.0136896	0.344453	2761729	2763727	1469
maker-Contig38-snap-gene-0.28	66.187	133.395	-1.00939	0.0137437	0.345279	115705	119888	1788
maker-LG07-augustus-gene-1079.4	231.171	524.845	-1.18314	0.0139565	0.349677	107938167	107944409	5174
maker-LG01-snap-gene-36.15	55.6511	133.557	-1.26114	0.013962	0.349677	3662607	3664343	1635
maker-LG01-snap-gene-1980.24	722.927	345.073	1.06709	0.0140085	0.3503	198019603	198024161	1689
maker-LG01-augustus-gene-1933.25	96.9542	205.99	-1.08482	0.0140371	0.350472	193349658	193352567	1573
maker-LG01-snap-gene-64.15	83.0396	194.923	-1.23122	0.0141007	0.351517	6420152	6423479	1581
maker-LG01-snap-gene-1752.71	46.5113	192.357	-2.04712	0.0141347	0.351825	175239853	175243342	2264
maker-LG09-augustus-gene-52.24	420.351	202.453	1.05445	0.0141611	0.35194	5238631	5241956	2622
augustus_masked-LG06-processed-gene-931.1	33.1972	176.628	-2.41175	0.0142866	0.354513	93150643	93152112	1470
maker-LG03-augustus-gene-1532.25	9.29786	37.4363	-2.00879	0.0145619	0.359468	153199136	153202236	2832
maker-LG06-augustus-gene-48.4	173.576	70.4627	1.30166	0.0145698	0.359468	4833252	4834600	653
maker-LG06-augustus-gene-1321.9	418.075	113.63	1.87835	0.0145827	0.359468	132181392	132183247	863
maker-LG01-augustus-gene-1776.36	171.283	394.746	-1.2036	0.0146189	0.359468	177601136	177606632	2306
maker-LG05-augustus-gene-516.28	160.322	286.598	-0.839141	0.014622	0.359468	51593280	51596714	2598
maker-LG09-augustus-gene-448.0	1658.87	1009.02	0.716789	0.0146409	0.359468	44842867	44844239	989
snap_masked-LG01-processed-gene-1963.24	192.242	549.485	-1.5154	0.0146418	0.359468	196370140	196376491	4947
maker-LG01-augustus-gene-1686.33	207.704	98.7474	1.07043	0.0147472	0.360556	168644712	168649925	2284
maker-LG03-augustus-gene-1559.56	2.93458	124.235	-5.40206	0.0147613	0.360556	155984304	155988756	3894
maker-LG09-augustus-gene-28.14	209.328	92.4185	1.17775	0.0147707	0.360556	2773646	2780305	2876
maker-LG03-snap-gene-159.36	52.8999	134.267	-1.34296	0.0147752	0.360556	15893096	15894349	1031
maker-LG03-snap-gene-1467.0	126.561	55.197	1.19887	0.0147984	0.360577	146681682	146684938	1352
maker-LG09-augustus-gene-24.12	2408.1	5502.46	-1.1921	0.0148486	0.360813	2427213	2429575	1355
augustus_masked-LG08-processed-gene-873.15	16.8205	118.106	-2.81049	0.0148527	0.360813	87317385	87317954	570
maker-LG03-augustus-gene-1403.7	531.194	1610.92	-1.60066	0.0149088	0.361635	140330066	140332011	992
maker-LG06-augustus-gene-375.6	76.3004	28.158	1.4306	0.0149629	0.362402	37522419	37524435	1098
snap_masked-LG08-processed-gene-1176.39	23.5456	6.33041	1.89965	0.0152203	0.368085	117638757	117639325	437
maker-LG07-snap-gene-897.0	0	21.6347	-6.88538	0.0152964	0.369374	89715549	89717431	1537
snap_masked-LG03-processed-gene-32.12	20419	6286.17	1.69973	0.0153481	0.370069	3248938	3249784	480
snap_masked-LG06-processed-gene-286.15	112.346	490.45	-2.12637	0.0154418	0.371062	28596905	28600338	1521
maker-LG06-augustus-gene-272.27	4564.99	8091.02	-0.825688	0.0154569	0.371062	27240324	27252316	4442
augustus_masked-LG01-processed-gene-1927.5	226.96	718.184	-1.6623	0.015458	0.371062	192733404	192739333	1329
maker-LG03-augustus-gene-1586.18	280.612	154.924	0.855762	0.0154878	0.371226	158652312	158655319	2448
maker-LG09-augustus-gene-193.3	434.943	1101.69	-1.34095	0.0155109	0.37123	19380083	19385874	1980
snap_masked-LG07-processed-gene-1185.37	4.04348	33.1035	-3.03146	0.0155885	0.371687	118511667	118514727	1445
maker-LG01-augustus-gene-1955.28	216.05	66.1918	1.71208	0.0155896	0.371687	195509400	195510658	501
snap_masked-LG01-processed-gene-1721.25	750.855	453.779	0.726914	0.015599	0.371687	172150790	172154481	2700
snap_masked-LG01-processed-gene-1618.2	0.336774	13.5642	-5.24688	0.0156392	0.371862	161793484	161794428	945
maker-LG01-snap-gene-5.16	547.875	295.386	0.890332	0.0156523	0.371862	508938	516768	6323
maker-LG03-augustus-gene-1481.15	20.5071	57.1685	-1.47394	0.0156845	0.37208	148121431	148123221	1177
augustus_masked-LG09-processed-gene-128.38	130.769	536.104	-2.03502	0.0157335	0.372251	12832585	12835889	2811
augustus_masked-LG01-processed-gene-76.45	227.13	91.1653	1.31994	0.0157456	0.372251	7598557	7603451	3655
maker-LG01-snap-gene-1940.49	1160.5	636.037	0.867955	0.0157753	0.372251	194024509	194030962	3899
maker-LG08-augustus-gene-87.2	2811.53	1099.28	1.3545	0.0158019	0.372251	8744258	8747459	1786
maker-LG01-augustus-gene-1838.15	385.959	208.185	0.889361	0.0158067	0.372251	183824120	183825329	605
augustus_masked-LG08-processed-gene-105.3	1059.37	1552.43	-0.551119	0.0158406	0.372506	10501521	10503257	1091
maker-LG01-snap-gene-1948.20	59.0985	257.405	-2.12255	0.0159285	0.374032	194855965	194857873	1821
maker-LG06-augustus-gene-264.4	126.216	60.8269	1.05362	0.0159794	0.374638	26397136	26399094	1363
maker-LG08-augustus-gene-1195.32	12.5575	0.408202	5.128	0.0160007	0.374638	119550558	119553566	1683
maker-LG06-augustus-gene-45.89	103.153	41.3528	1.31065	0.0161136	0.376737	4546108	4548910	1018
maker-LG09-augustus-gene-250.0	145.901	353.591	-1.27826	0.0161569	0.377205	25030291	25035769	2426
maker-LG01-snap-gene-1952.9	101.108	292.362	-1.5331	0.0161988	0.377637	195246786	195249871	1198
maker-LG06-snap-gene-396.18	392.384	215.232	0.865208	0.0162427	0.377825	39620153	39626269	3385
maker-LG05-snap-gene-1285.24	17.0641	81.1627	-2.24782	0.0162536	0.377825	128523503	128526369	2216
maker-LG06-augustus-gene-526.12	0.343089	8.30884	-4.54889	0.0163174	0.377911	52648087	52650019	1771
snap_masked-LG09-processed-gene-246.4	413.631	710.289	-0.77918	0.0163488	0.377911	24667803	24669806	590
maker-LG01-snap-gene-1864.24	155.872	308.07	-0.983964	0.0163695	0.377911	186419554	186422072	722
maker-LG05-snap-gene-1067.0	3.67321	22.0089	-2.57829	0.0163866	0.377911	106749588	106758269	1916
maker-LG01-snap-gene-1856.30	727.417	2797.67	-1.94337	0.01639	0.377911	185616840	185631276	3986
snap_masked-LG05-processed-gene-42.8	1.98714	11.7609	-2.56904	0.0163974	0.377911	4199009	4201459	1162
maker-LG07-augustus-gene-1199.12	38.7489	8.92625	2.12041	0.0164726	0.378827	119927050	119930283	2606
maker-LG08-augustus-gene-11.13	0.686179	10.7668	-4.00817	0.016484	0.378827	1152177	1153774	1154
maker-LG05-augustus-gene-372.23	105.606	357.321	-1.75738	0.0165464	0.379722	37248879	37250818	1494
maker-LG06-snap-gene-676.11	56.6048	6.63348	3.07693	0.0165976	0.380014	67616252	67622153	1832
snap_masked-LG01-processed-gene-1544.7	943.974	588.799	0.680827	0.0166061	0.380014	154399533	154404578	2110
augustus_masked-LG05-processed-gene-687.0	214.811	81.6901	1.39575	0.0166606	0.380724	68699417	68700313	897
maker-LG06-snap-gene-1052.5	204.902	464.26	-1.18018	0.0167595	0.381982	105217336	105219970	1414
snap_masked-LG01-processed-gene-2035.56	0.343089	8.76746	-4.62255	0.0167629	0.381982	203566057	203566839	783
maker-LG09-augustus-gene-947.9	247.138	417.589	-0.756379	0.0168933	0.38421	94764907	94771061	777
snap_masked-LG01-processed-gene-1844.31	176.046	75.0947	1.23276	0.0169082	0.38421	184426074	184426484	411
maker-LG09-augustus-gene-190.2	18.9069	79.0987	-2.06154	0.0170143	0.385128	19043241	19044270	729
augustus_masked-LG05-processed-gene-481.5	17.369	1.62142	3.40469	0.0170221	0.385128	48122437	48123087	651
maker-LG03-snap-gene-1492.27	2132.09	4239.64	-0.991657	0.0170602	0.385128	149220913	149223297	925
snap_masked-LG01-processed-gene-1859.30	11.3144	53.5549	-2.24437	0.0170674	0.385128	185911372	185911866	495
augustus_masked-LG01-processed-gene-94.0	266.597	477.313	-0.840847	0.0170676	0.385128	9393016	9398894	2476
maker-LG09-augustus-gene-1099.11	167.583	571.776	-1.77075	0.017096	0.385231	109978126	109980292	1281
augustus_masked-LG08-processed-gene-1133.26	194.026	72.7527	1.40858	0.0171477	0.385859	113354668	113354982	315
maker-LG03-augustus-gene-1001.10	2.27147	13.6876	-2.57344	0.0171981	0.386039	100138594	100140294	1610
maker-LG02-augustus-gene-1837.20	641.764	1029.84	-0.682545	0.0172187	0.386039	183763857	183768399	3416
snap_masked-LG01-processed-gene-1927.8	0	7.37541	-5.33913	0.0172329	0.386039	192702052	192702249	198
snap_masked-LG08-processed-gene-953.34	30.9106	9.98224	1.63353	0.0172511	0.386039	95312083	95312514	432
maker-LG03-snap-gene-1489.3	423.854	164.358	1.36465	0.0172813	0.386179	148912408	148913781	562
snap_masked-LG06-processed-gene-137.31	0.686179	130.903	-7.58502	0.0173183	0.386236	13766760	13767761	900
maker-LG07-augustus-gene-1218.78	33.2826	5.72283	2.54131	0.0173315	0.386236	121870590	121871844	983
maker-LG01-snap-gene-793.37	16.8424	3.3587	2.28192	0.017385	0.386613	79295485	79301971	3659
maker-LG01-snap-gene-944.5	661.33	299.46	1.14507	0.0174038	0.386613	94424243	94427255	2052
maker-LG06-augustus-gene-47.40	1887.72	4798.17	-1.34588	0.0174202	0.386613	4747346	4753781	2762
maker-LG01-snap-gene-108.30	150.79	318.74	-1.07779	0.0174712	0.387215	10825523	10828906	987
snap_masked-LG07-processed-gene-808.21	470.154	294.116	0.675812	0.0175614	0.388682	80874548	80876546	927
maker-Contig2-snap-gene-3.34	513.191	802.378	-0.644464	0.0175878	0.388733	353650	358888	2778
maker-LG01-snap-gene-1812.55	457.597	201.677	1.18319	0.0176143	0.388789	181255463	181257069	1519
maker-LG06-augustus-gene-1246.39	25.7488	8.4755	1.59656	0.0176478	0.388998	124613662	124614356	610
maker-LG07-snap-gene-1229.20	7.70213	46.3251	-2.5937	0.0176735	0.389034	122911263	122912360	839
maker-LG05-augustus-gene-376.3	854.915	2477.81	-1.53523	0.0177478	0.390068	37614979	37620288	1856
maker-LG05-snap-gene-35.26	88.0174	31.202	1.50327	0.017786	0.390068	3578944	3586770	2132
maker-LG07-augustus-gene-1192.56	171.119	73.0441	1.23281	0.0177928	0.390068	119244410	119245580	1041
snap_masked-LG02-processed-gene-1565.5	6.93385	40.7818	-2.55231	0.0178321	0.3904	156513319	156513993	675
maker-LG03-snap-gene-1565.28	25.0638	63.3866	-1.33645	0.0178888	0.391112	156575974	156582301	4865
snap_masked-LG07-processed-gene-1243.77	6.30039	0	5.09316	0.0179233	0.391338	124397068	124399293	1940
maker-LG06-augustus-gene-4.45	19.1666	54.6035	-1.50799	0.0179569	0.391543	433596	434193	339
maker-LG05-augustus-gene-94.76	201.612	659.101	-1.70879	0.017996	0.391739	9391619	9395406	1573
maker-LG06-augustus-gene-24.3	1103.04	3772.46	-1.77403	0.0180484	0.391739	2463805	2467078	2244
maker-LG06-augustus-gene-158.50	20.6724	1.05677	4.31775	0.018061	0.391739	15835521	15844025	2323
maker-LG02-augustus-gene-1821.19	141.121	458.043	-1.69869	0.0180834	0.391739	182183680	182188035	2399
augustus_masked-LG01-processed-gene-477.2	492.899	1120.62	-1.18526	0.0181298	0.391739	47774849	47775478	630
maker-LG02-snap-gene-1683.23	115.257	25.4823	2.18247	0.018133	0.391739	168342022	168348760	1974
snap_masked-LG07-processed-gene-1232.30	1759.4	1024.03	0.781387	0.0181377	0.391739	123220857	123225430	1915
maker-LG03-augustus-gene-1577.69	883.826	1820.15	-1.04223	0.0181618	0.391739	157686426	157692807	3049
maker-LG01-snap-gene-1602.30	91.8517	0.648569	7.13468	0.0181838	0.391739	160253905	160256742	1251
snap_masked-LG06-processed-gene-137.30	0	109.058	-9.22183	0.0182758	0.392983	13765532	13766110	579
maker-LG01-snap-gene-10.88	111.956	198.72	-0.829342	0.0182901	0.392983	1033609	1035022	780
snap_masked-Contig6-processed-gene-5.26	10.0744	59.2535	-2.56234	0.0184479	0.395848	582884	586057	2709
maker-LG06-augustus-gene-378.10	85.7974	165.587	-0.94833	0.0185808	0.39793	37833559	37835836	797
maker-LG05-augustus-gene-147.0	577.271	1131.34	-0.970335	0.0185968	0.39793	14716693	14718476	1035
maker-LG07-augustus-gene-1214.11	841.285	2116.34	-1.33092	0.0186188	0.39793	121464552	121469051	1628
maker-LG01-snap-gene-1718.5	101.874	48.79	1.05402	0.0187079	0.398252	171846275	171847279	882
maker-LG02-snap-gene-1791.2	26.7152	84.4718	-1.66148	0.0187178	0.398252	179152396	179155347	1155
maker-LG06-augustus-gene-45.85	393.196	735.167	-0.902486	0.0187236	0.398252	4507046	4512556	3082
maker-LG01-augustus-gene-1684.25	28.2828	8.76824	1.69532	0.0187323	0.398252	168477890	168482137	1803
augustus_masked-LG05-processed-gene-386.10	120.685	55.2694	1.1211	0.0188684	0.400619	38601239	38603604	2366
maker-LG09-augustus-gene-31.24	75.8158	169.922	-1.16372	0.0188935	0.400625	3095359	3099575	2954
snap_masked-LG05-processed-gene-686.15	32.2789	87.8329	-1.44488	0.018937	0.401022	68595128	68597508	2122
maker-Contig5-snap-gene-4.21	14.2414	0.690723	4.39991	0.0190345	0.40256	425425	428835	1165
maker-LG06-augustus-gene-298.0	84.3726	31.2826	1.42429	0.0191412	0.404289	29838446	29838876	219
maker-LG01-augustus-gene-59.42	60.8695	193.263	-1.66702	0.0194572	0.410428	5963497	5969375	4501
maker-LG06-snap-gene-235.29	719.929	1177.7	-0.710028	0.0195205	0.410736	23569962	23573913	1962
snap_masked-LG02-processed-gene-53.1	5793.64	2441.95	1.24658	0.0195226	0.410736	5371861	5373078	1218
snap_masked-LG07-processed-gene-975.3	127.37	281.799	-1.14612	0.0195957	0.411738	97510340	97512956	1136
snap_masked-LG03-processed-gene-1576.38	103.777	36.3139	1.52473	0.0196422	0.412179	157617738	157618697	960
maker-LG07-augustus-gene-367.1	253.539	133.909	0.924087	0.019698	0.412816	36762961	36766987	3794
maker-LG09-snap-gene-81.61	753.501	483.855	0.639129	0.0198136	0.414702	8153353	8158129	2811
maker-LG09-augustus-gene-1012.3	219.002	116.712	0.909018	0.0198842	0.415642	101273270	101282355	2914
augustus_masked-LG08-processed-gene-1163.33	915.805	390.909	1.22806	0.0199434	0.416306	116354078	116355166	1089
maker-LG07-snap-gene-808.33	402.893	243.192	0.728078	0.0199811	0.416306	80866428	80869255	958
maker-LG06-snap-gene-330.2	192.235	356.078	-0.890265	0.0200352	0.416306	32988430	32993116	1829
maker-LG03-augustus-gene-1561.40	0.686179	13.7358	-4.35012	0.0200416	0.416306	156159764	156161110	1166
maker-LG03-augustus-gene-1585.77	1401.48	870.681	0.686226	0.0200446	0.416306	158514928	158526020	8594
maker-Contig30-snap-gene-1.22	6.99481	0.282521	4.28157	0.0201498	0.417311	192305	195622	1001
maker-LG01-snap-gene-292.8	346.013	179.411	0.947838	0.0201702	0.417311	29238960	29245723	2464
maker-LG06-snap-gene-254.20	657.883	356.846	0.88237	0.0201704	0.417311	25385753	25391225	3411
maker-LG05-augustus-gene-1366.8	13.2712	0.816405	4.15927	0.0203527	0.419843	136653287	136657283	2817
maker-LG01-augustus-gene-2040.35	3126.83	4565.86	-0.546185	0.0203571	0.419843	204061505	204065832	2780
augustus_masked-LG06-processed-gene-422.12	1004.23	556.287	0.851521	0.0203706	0.419843	42240050	42240529	480
snap_masked-LG01-processed-gene-1926.43	95.5849	35.5033	1.42869	0.0204756	0.420239	192635254	192636840	1587
maker-LG08-snap-gene-1128.26	17.6689	3.17071	2.50816	0.0204757	0.420239	112858384	112867220	1034
maker-Contig29-snap-gene-1.14	61.2114	141.785	-1.21111	0.0204765	0.420239	194161	196621	1540
maker-LG01-snap-gene-1894.19	64.6083	23.4907	1.44923	0.0204938	0.420239	189432751	189436573	1325
maker-LG01-snap-gene-1728.3	39.8572	144.55	-1.86041	0.0205672	0.421018	172857477	172861150	2609
maker-LG05-snap-gene-1237.1	214.788	881.499	-2.03662	0.0206012	0.421018	123763945	123768778	2818
snap_masked-LG06-processed-gene-6.87	14.0054	1.78926	3.01242	0.0206098	0.421018	675986	676824	364
maker-Contig14-augustus-gene-1.64	583.656	387.36	0.592203	0.0207182	0.421729	163070	166564	1381
maker-LG01-snap-gene-881.9	191.432	335.821	-0.81068	0.0207214	0.421729	88149939	88153491	1726
augustus_masked-LG06-processed-gene-123.26	17.4809	1.54889	3.5715	0.0207345	0.421729	12317747	12318805	1059
maker-LG01-augustus-gene-1691.31	1521.51	697.057	1.12676	0.0207489	0.421729	169139365	169145988	3577
maker-LG05-augustus-gene-1282.1	3.35099	25.0759	-2.9012	0.0208664	0.423586	128259802	128261450	1562
augustus_masked-LG01-processed-gene-1789.17	933.106	410.382	1.18653	0.020914	0.423751	178935799	178938864	2170
augustus_masked-LG06-processed-gene-56.71	165.643	347.678	-1.07002	0.0209269	0.423751	5647443	5648871	1110
maker-LG01-snap-gene-2001.51	1327.75	775.194	0.775835	0.0209563	0.423814	200172060	200178832	4952
maker-LG06-augustus-gene-60.24	2491.05	975.303	1.35234	0.0209867	0.423899	6007745	6009055	830
maker-LG07-snap-gene-1156.27	36.2348	159.548	-2.13889	0.0210431	0.424509	115639029	115641399	1945
maker-LG01-snap-gene-1980.25	50.8958	129.544	-1.34663	0.0210738	0.424598	198030342	198036450	4820
augustus_masked-LG06-processed-gene-386.14	21.3742	144.357	-2.75535	0.0211437	0.424952	38601327	38601824	498
maker-LG02-snap-gene-1733.12	84.5831	38.0687	1.15478	0.0211438	0.424952	173357364	173358743	1204
maker-LG05-augustus-gene-1155.7	240.119	672.292	-1.48552	0.0211821	0.425193	115509222	115518557	1650
maker-LG06-augustus-gene-158.51	18.5268	0	6.64895	0.0212524	0.425271	15856619	15862518	4098
snap_masked-LG01-processed-gene-403.6	285.14	468.6	-0.716235	0.0212567	0.425271	40376290	40380415	2318
maker-LG07-snap-gene-881.35	124.339	67.8135	0.872091	0.0212648	0.425271	88165729	88168838	2076
maker-LG05-augustus-gene-551.4	588.729	315.508	0.900665	0.0213371	0.426056	55137356	55142956	4598
maker-LG06-augustus-gene-11.50	253.038	463.659	-0.873053	0.0213568	0.426056	1141396	1145644	2027
maker-LG01-snap-gene-1581.17	5144.42	1825.27	1.49513	0.0215469	0.428367	158115160	158116029	708
snap_masked-LG06-processed-gene-183.6	20.4401	5.65069	1.88666	0.0215668	0.428367	18382046	18388479	3099
maker-LG01-snap-gene-62.24	25.0257	5.536	2.21586	0.0215993	0.428367	6249881	6253659	2599
snap_masked-LG06-processed-gene-65.8	2908.75	1434.29	1.02028	0.0216173	0.428367	6584367	6584978	612
maker-LG08-snap-gene-1021.53	885.813	531.274	0.737228	0.0216329	0.428367	102101037	102105424	2606
augustus_masked-LG06-processed-gene-1318.17	52.7794	19.9759	1.40702	0.0216804	0.428367	131872885	131874234	1350
maker-LG02-augustus-gene-379.10	60.06	159.374	-1.40863	0.0216915	0.428367	37977716	37980077	1769
snap_masked-Contig6-processed-gene-0.3	647.768	402.799	0.684985	0.0216941	0.428367	20036	21889	1854
maker-LG02-snap-gene-1333.1	20.443	68.4192	-1.74015	0.0217144	0.428367	133335443	133337621	1602
maker-LG06-snap-gene-114.29	16.6433	1.78965	3.25743	0.0217374	0.428367	11408633	11412079	3238
maker-LG09-augustus-gene-71.16	160.671	73.8671	1.11612	0.0217866	0.428815	7096975	7100066	1445
maker-LG06-snap-gene-309.13	28.9842	5.0952	2.4757	0.0219753	0.431876	30950149	30952192	1710
maker-LG06-augustus-gene-887.10	61.809	9.3334	2.70749	0.0219956	0.431876	88763102	88768462	1935
augustus_masked-LG03-processed-gene-1559.16	980.795	335.639	1.54825	0.0221125	0.433272	155950533	155952815	1188
maker-LG01-snap-gene-1439.11	209.911	117.612	0.836433	0.0221202	0.433272	143974333	143977910	1458
snap_masked-LG07-processed-gene-1234.41	246.339	490.871	-0.995013	0.0222116	0.434535	123440865	123443086	1074
maker-LG01-snap-gene-816.3	13.6067	1.82081	2.85365	0.0222886	0.435516	81641511	81645805	2034
maker-LG01-snap-gene-1543.5	89.9002	0	8.92814	0.0223287	0.435774	154308426	154309408	741
maker-LG06-augustus-gene-96.17	21.2715	0.324285	5.8864	0.0223808	0.436173	9592578	9594543	941
augustus_masked-LG05-processed-gene-1198.7	0.343089	6.61332	-4.21625	0.0224031	0.436173	119885566	119886417	852
augustus_masked-LG05-processed-gene-1356.29	3.38256	17.4237	-2.37058	0.0224997	0.437526	135586636	135587319	684
maker-LG06-snap-gene-263.31	40.8607	4.23847	3.30279	0.0226137	0.439217	26357785	26360126	1795
maker-LG06-augustus-gene-1101.19	7.72202	0.324285	4.42799	0.0227955	0.441358	110092261	110094752	2236
augustus_masked-LG05-processed-gene-1351.22	859.195	554.743	0.630801	0.0228057	0.441358	135104907	135109368	2361
augustus_masked-LG05-processed-gene-230.18	216.368	110.696	0.967071	0.0228058	0.441358	23026527	23029427	1963
maker-LG02-snap-gene-1807.66	124.334	39.2308	1.66515	0.0228685	0.441962	180710829	180716189	3347
maker-LG06-snap-gene-239.6	99.9736	281.54	-1.49354	0.0229155	0.441962	23942189	23945082	1596
maker-LG01-snap-gene-1804.31	176.898	88.4654	1.00568	0.0229296	0.441962	180472530	180477399	2319
snap_masked-LG06-processed-gene-106.54	52.2496	16.0327	1.72523	0.0229463	0.441962	10598929	10602213	2096
maker-LG08-snap-gene-874.25	1039.22	510.524	1.02634	0.0230125	0.44271	87474518	87478925	2924
maker-LG02-snap-gene-1424.2	209.533	553.454	-1.40141	0.0230994	0.443854	142391684	142394087	1403
maker-LG06-snap-gene-521.11	71.4075	342.26	-2.26124	0.0231423	0.444066	52144105	52147529	1435
maker-LG09-snap-gene-118.14	23.7925	121.887	-2.35787	0.0232133	0.444066	11800746	11801465	570
maker-LG08-augustus-gene-1139.1	221.245	397.293	-0.844104	0.0232175	0.444066	113896078	113898600	2185
maker-LG07-snap-gene-1233.58	154.14	42.2369	1.87216	0.023313	0.444066	123328062	123331607	2324
maker-LG06-augustus-gene-525.13	156.873	683.167	-2.12268	0.0233224	0.444066	52520694	52522511	1538
maker-LG06-snap-gene-76.4	147.695	277.189	-0.907539	0.0233254	0.444066	7618954	7621707	1756
snap_masked-LG01-processed-gene-1695.55	569.626	892.602	-0.647547	0.0233505	0.444066	169518368	169518961	594
maker-LG06-augustus-gene-178.7	11.2051	68.9706	-2.62249	0.023356	0.444066	17859203	17860593	1289
maker-LG06-augustus-gene-1301.38	305.771	465.366	-0.606735	0.0233575	0.444066	130092797	130096348	2141
augustus_masked-LG09-processed-gene-8.40	169.832	88.9858	0.934776	0.0235064	0.446162	863347	865797	2451
maker-LG06-augustus-gene-375.0	990.945	1436.31	-0.535214	0.0235229	0.446162	37498693	37501157	1240
snap_masked-Contig8-processed-gene-2.48	87.9592	256.164	-1.54256	0.0235567	0.446281	229661	235862	2394
maker-LG06-augustus-gene-80.0	0.686179	9.38682	-3.79624	0.0236466	0.44746	8045605	8046643	672
maker-LG01-snap-gene-1849.1	141.937	84.0457	0.754931	0.023706	0.447613	184891005	184894685	2288
maker-LG01-snap-gene-76.15	5.69604	0	4.94667	0.02371	0.447613	7657160	7659249	1440
maker-LG01-snap-gene-1859.25	926.617	523.841	0.822893	0.0237868	0.44854	185932386	185935018	2259
maker-LG08-snap-gene-1101.29	658.951	386.094	0.770502	0.023976	0.451061	110098302	110099201	583
maker-LG06-snap-gene-1022.9	5.00767	24.2732	-2.27943	0.0239763	0.451061	102216088	102218766	1295
maker-LG06-augustus-gene-74.8	38.5502	12.4618	1.63222	0.0243126	0.45641	7445212	7446948	594
maker-LG03-snap-gene-21.59	21.3152	6.16336	1.78104	0.0243514	0.45641	2152345	2154587	1223
snap_masked-LG03-processed-gene-1553.7	321.154	906.847	-1.4977	0.0243961	0.45641	155292567	155294259	1535
maker-LG01-snap-gene-1985.22	47.6511	199.586	-2.06523	0.0244489	0.45641	198496310	198498155	1083
maker-LG01-augustus-gene-1714.24	39.4291	8.73864	2.18753	0.0244661	0.45641	171405548	171408319	2043
snap_masked-LG09-processed-gene-26.43	132.236	338.548	-1.35614	0.0244898	0.45641	2618261	2620876	1659
maker-LG08-snap-gene-1159.51	798.395	298.544	1.4208	0.0244959	0.45641	115889804	115901901	2401
maker-LG01-snap-gene-45.18	243.286	153.524	0.665436	0.0245296	0.45641	4541248	4544470	2221
maker-LG01-augustus-gene-1691.28	571.148	1005.93	-0.817048	0.0245437	0.45641	169090148	169093987	1850
maker-LG07-snap-gene-1242.0	0	9.9803	-5.77251	0.0245587	0.45641	124192561	124193335	578
maker-LG06-augustus-gene-139.46	16.0671	2.51153	2.65334	0.0245709	0.45641	13931082	13936409	3208
maker-LG09-augustus-gene-1012.2	3031.69	1723.35	0.815067	0.0246395	0.457158	101224590	101234028	3153
augustus_masked-LG01-processed-gene-1697.59	131.982	2.43783	5.76364	0.024696	0.457338	169749901	169750239	339
augustus_masked-LG09-processed-gene-53.29	1693.94	603.914	1.48871	0.0247057	0.457338	5347762	5348232	471
maker-LG06-augustus-gene-1335.37	477.625	243.851	0.970071	0.0248183	0.458897	133548815	133552337	3110
augustus_masked-LG06-processed-gene-54.16	478.472	257.66	0.893502	0.024885	0.459606	5417124	5417531	408
augustus_masked-LG09-processed-gene-702.4	0	5.39971	-4.88318	0.0249791	0.460817	70237319	70238914	1596
snap_masked-LG01-processed-gene-1711.42	475.252	867.546	-0.868072	0.0250677	0.461513	171090510	171092508	1601
maker-LG09-augustus-gene-21.72	235.605	72.5483	1.70486	0.0250939	0.461513	2121505	2122622	789
maker-LG05-augustus-gene-683.0	776.43	438.012	0.824585	0.0251283	0.461513	68301849	68304239	2124
augustus_masked-LG08-processed-gene-1142.20	84.3738	34.0484	1.29829	0.0251346	0.461513	114262045	114262320	276
snap_masked-LG07-processed-gene-274.3	681.688	444.126	0.617458	0.0251594	0.461513	27397516	27408730	3692
augustus_masked-LG06-processed-gene-189.11	32.5698	78.1999	-1.26648	0.0253409	0.463861	18927761	18929236	1118
maker-LG01-snap-gene-1873.1	35.5881	10.8408	1.72461	0.0253448	0.463861	187300708	187306321	2197
snap_masked-LG08-processed-gene-993.33	306.9	466.648	-0.604479	0.0254052	0.464442	99334914	99338032	725
snap_masked-LG01-processed-gene-1814.54	356.892	838.813	-1.23233	0.0255295	0.465781	181467192	181469532	1711
maker-LG08-augustus-gene-1164.27	35.2885	8.89431	1.99603	0.0255386	0.465781	116446728	116452667	3584
maker-LG08-augustus-gene-1166.9	8.21394	0.732487	3.57151	0.025601	0.465781	116592152	116594220	1452
augustus_masked-LG06-processed-gene-1321.25	2469.4	5498.19	-1.15471	0.0256569	0.465781	132135712	132139467	1647
maker-LG01-snap-gene-1988.1	4334.02	2881.79	0.588893	0.0256697	0.465781	198798797	198801619	1371
maker-LG01-snap-gene-1696.51	2011.29	1352.14	0.573106	0.0256701	0.465781	169665302	169672233	3228
maker-LG03-snap-gene-691.2	0.313708	6.80093	-4.26608	0.02568	0.465781	69161331	69164514	1614
maker-LG06-snap-gene-115.13	290.555	465.738	-0.680866	0.0257785	0.467033	11582300	11586098	1257
augustus_masked-LG03-processed-gene-1465.0	1776.58	917.944	0.95267	0.0258068	0.467033	146541068	146542354	1287
maker-LG07-snap-gene-270.24	357.271	145.834	1.29569	0.0259168	0.468501	27052334	27053112	378
snap_masked-LG01-processed-gene-1860.1	760.384	373.08	1.02822	0.0260055	0.469391	186066865	186067821	957
maker-LG06-snap-gene-236.24	128.966	69.4443	0.891879	0.0260241	0.469391	23623868	23627293	2101
maker-LG07-snap-gene-1139.51	104.137	225.524	-1.11393	0.0261118	0.470039	113901402	113903113	1623
maker-LG01-augustus-gene-144.41	56.2947	8.61074	2.69182	0.0261181	0.470039	14422191	14425470	2145
maker-LG07-snap-gene-437.17	207.45	469.928	-1.1796	0.0261519	0.470125	43743359	43746824	1653
maker-LG01-augustus-gene-1606.16	295.039	1008.32	-1.77298	0.0262445	0.470519	160662843	160664968	1260
snap_masked-LG06-processed-gene-323.6	156.256	49.4205	1.65686	0.0262761	0.470519	32301662	32303922	1743
maker-LG07-augustus-gene-1189.2	48.4565	95.2497	-0.973362	0.0262976	0.470519	118920227	118922159	1401
maker-LG03-snap-gene-101.29	35.9975	135.113	-1.90798	0.0263033	0.470519	10087730	10092309	3873
snap_masked-LG06-processed-gene-1118.4	583.87	203.224	1.52464	0.0263731	0.470519	111846688	111847791	1104
maker-LG07-snap-gene-1213.72	459.356	716.742	-0.642575	0.0263794	0.470519	121308289	121313987	2508
snap_masked-LG03-processed-gene-1540.12	1319.53	843.659	0.645345	0.0263798	0.470519	153990422	153997078	2541
maker-LG05-augustus-gene-1322.3	135.279	301.354	-1.15603	0.0264096	0.470519	132255220	132258541	1812
maker-LG01-snap-gene-1673.26	68.7838	120.849	-0.810582	0.0264404	0.470519	167323764	167327901	2694
snap_masked-LG05-processed-gene-116.44	71.736	151.361	-1.07529	0.0264647	0.470519	11630482	11634636	2416
maker-LG01-snap-gene-57.59	223.219	118.935	0.909705	0.0264986	0.470605	5731328	5734864	2335
snap_masked-LG01-processed-gene-1792.45	494.268	290.371	0.766759	0.0265573	0.470689	179269365	179274110	3378
snap_masked-LG01-processed-gene-1859.37	3386.96	6199.39	-0.872034	0.0265616	0.470689	185958229	185959743	987
snap_masked-LG07-processed-gene-1237.29	172.697	104.524	0.724952	0.0266476	0.471697	123752471	123752974	504
maker-LG02-snap-gene-804.0	895.406	274.324	1.70782	0.0267053	0.471714	80397135	80398992	1329
augustus_masked-LG06-processed-gene-759.6	157.009	59.1754	1.41073	0.0267069	0.471714	75909346	75909864	519
maker-LG03-augustus-gene-1456.15	451.903	995.608	-1.13985	0.0269406	0.475324	145669749	145671668	1025
maker-LG06-augustus-gene-252.18	499.135	1350.72	-1.43637	0.0269887	0.475539	25194491	25195072	492
snap_masked-LG06-processed-gene-85.1	13.6942	0.324285	5.25054	0.0270126	0.475539	8492209	8496826	1753
maker-LG06-snap-gene-1303.6	63.7124	22.5293	1.4916	0.027041	0.475539	130380681	130382088	1218
augustus_masked-LG05-processed-gene-77.19	557.423	201.576	1.46964	0.0270878	0.475846	7751174	7751800	627
maker-LG01-snap-gene-441.8	317.231	593.62	-0.904023	0.0271234	0.475954	44115679	44118744	2061
maker-LG08-augustus-gene-1152.63	971.562	1615.11	-0.733248	0.0271688	0.476234	115223778	115225037	811
snap_masked-LG01-processed-gene-839.6	55.8988	200.986	-1.8447	0.0273161	0.478298	83954726	83955232	507
maker-LG06-augustus-gene-1335.39	193.797	320.313	-0.725591	0.0274377	0.479907	133561876	133567783	2243
maker-LG01-snap-gene-2006.4	368.206	243.795	0.59512	0.0276149	0.482012	200685161	200687409	1034
maker-LG07-augustus-gene-228.28	143.548	346.646	-1.27194	0.0276304	0.482012	22853412	22860440	1768
snap_masked-LG02-processed-gene-1806.60	314.132	197.309	0.668836	0.0276474	0.482012	180592448	180596087	2761
maker-LG03-snap-gene-563.9	78.049	164.016	-1.07283	0.0277114	0.482195	56361284	56362064	356
snap_masked-LG06-processed-gene-375.47	201.216	62.8636	1.68282	0.0277467	0.482195	37548326	37549093	768
augustus_masked-LG06-processed-gene-496.8	44.9316	207.688	-2.2096	0.0277473	0.482195	49596108	49597289	1182
maker-LG09-augustus-gene-262.33	0	5.97575	-5.02614	0.0278287	0.482621	26218806	26221235	1703
maker-LG05-snap-gene-211.3	9353.34	4669.75	1.0022	0.0278315	0.482621	21136604	21147090	3824
maker-LG06-snap-gene-1248.23	2543.64	1592.84	0.675367	0.0278676	0.48273	124814284	124819487	2304
augustus_masked-LG09-processed-gene-92.15	127.998	326.961	-1.35244	0.0279879	0.482986	9278843	9286192	1690
snap_masked-LG02-processed-gene-4.13	11.7668	50.1187	-2.09567	0.0279884	0.482986	455701	455973	273
snap_masked-LG06-processed-gene-67.0	225.294	115.523	0.96554	0.0280349	0.482986	6690321	6691436	1116
maker-LG01-snap-gene-1615.11	267.937	590.098	-1.13891	0.0280436	0.482986	161489461	161491014	1193
snap_masked-LG01-processed-gene-1972.47	142.067	278.672	-0.970771	0.0281333	0.482986	197274417	197274698	282
maker-LG03-augustus-gene-1471.14	1.69018	14.2853	-3.08056	0.0281397	0.482986	147158603	147162290	1880
maker-LG02-snap-gene-48.13	164.877	344.927	-1.06527	0.0281405	0.482986	4797820	4801678	2797
maker-LG03-augustus-gene-1371.1	26.2922	5.26226	2.29681	0.0281436	0.482986	137118260	137121339	2179
augustus_masked-LG01-processed-gene-1836.93	822.492	1435.1	-0.803024	0.028151	0.482986	183657259	183659973	2243
maker-LG07-augustus-gene-367.0	5.87547	0	4.99379	0.0283076	0.484403	36726823	36729992	1632
snap_masked-LG06-processed-gene-412.23	8.67358	0.690723	3.69235	0.0283169	0.484403	41278372	41280401	1513
maker-LG01-snap-gene-268.4	281.626	128.067	1.13629	0.0283446	0.484403	26884210	26886576	1561
maker-LG06-snap-gene-43.46	318.991	513.224	-0.687003	0.0284023	0.484403	4356004	4362810	4594
maker-LG01-snap-gene-1972.14	2.93458	19.644	-2.73097	0.0284138	0.484403	197270299	197272126	1422
maker-LG03-snap-gene-562.4	48.0976	93.4797	-0.962548	0.0284183	0.484403	56279852	56280802	237
maker-LG05-augustus-gene-1340.5	628.677	394.506	0.672276	0.0284973	0.484403	133987707	134011996	3973
snap_masked-LG01-processed-gene-440.2	4.42858	24.6449	-2.47985	0.0285172	0.484403	43993978	43995975	1998
maker-LG03-augustus-gene-1567.104	98.32	42.2606	1.21241	0.028536	0.484403	156693915	156699107	2960
maker-LG06-snap-gene-1066.18	552.044	908.067	-0.717995	0.0285429	0.484403	106615645	106618433	1012
augustus_masked-LG07-processed-gene-132.0	12.543	61.9432	-2.30198	0.0285837	0.484403	13286129	13289476	2116
snap_masked-LG06-processed-gene-71.100	2199.61	1354.56	0.699413	0.0285935	0.484403	7160366	7162856	1299
maker-LG01-snap-gene-1720.25	7.01909	38.0114	-2.43135	0.0286295	0.484403	172086321	172087301	774
snap_masked-LG07-processed-gene-1080.9	6.28557	0.324285	4.12823	0.0287245	0.484403	108018158	108018880	723
maker-LG01-augustus-gene-1881.39	54.5235	24.6109	1.14283	0.0287518	0.484403	188110033	188114763	1949
maker-LG09-augustus-gene-798.11	17443.8	10657.9	0.710811	0.0287569	0.484403	79884747	79888021	2159
maker-LG05-augustus-gene-28.56	1588.82	2973.64	-0.904262	0.0287632	0.484403	2865098	2870765	2156
maker-LG02-snap-gene-318.0	97.2286	43.6346	1.14916	0.0288181	0.484403	31801528	31804057	2040
snap_masked-LG01-processed-gene-1937.3	16.1657	2.9721	2.49627	0.0288441	0.484403	193713890	193714753	864
maker-LG01-snap-gene-1876.34	172.217	405.484	-1.23521	0.0288737	0.484403	187650777	187653534	851
maker-LG03-snap-gene-319.2	1177.52	701.472	0.74672	0.0288751	0.484403	31913764	31919251	3864
maker-LG05-augustus-gene-865.1	5.06424	31.6877	-2.64624	0.0289523	0.484403	86536958	86538885	1621
maker-LG01-snap-gene-174.0	75.7037	139.224	-0.880305	0.0289652	0.484403	17429676	17433079	1166
maker-LG06-snap-gene-124.38	77.6886	1.91533	5.36746	0.0289742	0.484403	12395067	12396522	243
maker-LG02-snap-gene-1838.56	246.312	113.504	1.11641	0.0289822	0.484403	183803864	183806627	1789
augustus_masked-LG09-processed-gene-78.30	1.64405	10.6114	-2.67458	0.0291203	0.485855	7840978	7843595	828
maker-LG06-augustus-gene-178.2	704.515	1059.11	-0.58829	0.0291291	0.485855	17853700	17857156	1671
snap_masked-LG01-processed-gene-1802.18	51.1426	19.5684	1.39133	0.0292735	0.487761	180212073	180212861	789
maker-LG03-snap-gene-159.44	19.7478	56.1618	-1.50266	0.0295095	0.491187	15940028	15944202	1359
maker-LG01-snap-gene-1826.8	373.684	227.429	0.715072	0.0297302	0.49318	182656142	182658861	2209
snap_masked-LG01-processed-gene-71.8	3605.58	2257.2	0.67562	0.0297527	0.49318	7100553	7101578	1026
augustus_masked-LG08-processed-gene-576.5	41.7003	15.8539	1.41397	0.0297856	0.49318	57626227	57627630	1404
snap_masked-LG09-processed-gene-52.47	236.578	133.002	0.832958	0.0298347	0.49318	5221149	5221679	459
maker-LG06-augustus-gene-145.1	25.8941	4.49939	2.51433	0.0298368	0.49318	14532638	14537208	2966
maker-LG06-augustus-gene-640.11	389.323	131.428	1.56881	0.0298375	0.49318	64013427	64015565	1386
maker-LG02-snap-gene-298.15	856.33	459.652	0.897203	0.0298621	0.49318	29847078	29849635	2160
augustus_masked-LG06-processed-gene-159.22	18.365	1.13008	3.95251	0.0298731	0.49318	15913137	15915776	1521
maker-LG05-augustus-gene-49.5	33.795	72.2634	-1.09659	0.0299051	0.493205	4958846	4963116	3558
maker-Contig4-snap-gene-2.16	480.615	303.165	0.66352	0.0299393	0.493267	272625	277541	1745
maker-LG01-snap-gene-1854.63	98.2828	38.6101	1.33798	0.0300215	0.493307	185412049	185415616	1942
snap_masked-LG09-processed-gene-117.72	74.0358	34.3504	1.10481	0.030046	0.493307	11710307	11714909	3165
maker-LG03-augustus-gene-1490.34	10.7447	1.21361	3.08903	0.0300489	0.493307	149018665	149020215	1144
maker-LG01-snap-gene-1979.18	665.146	1426.51	-1.1008	0.0300637	0.493307	197892264	197894204	980
maker-LG01-augustus-gene-2044.41	189.769	390.156	-1.03902	0.0301545	0.493387	204510528	204516022	2110
snap_masked-Contig15-processed-gene-0.47	112.513	50.5336	1.16063	0.0301553	0.493387	81470	85778	1693
maker-LG07-augustus-gene-1225.20	13.9666	2.38546	2.49112	0.030168	0.493387	122574689	122575137	303
maker-LG01-augustus-gene-1482.8	283.815	120.505	1.23229	0.0301906	0.493387	148271090	148286321	3243
maker-LG01-augustus-gene-606.3	0	4.94936	-4.7605	0.0303468	1	60673826	60674215	318
maker-LG07-augustus-gene-72.0	19.2387	108.147	-2.49026	0.0305136	0.497256	7205170	7205864	591
maker-LG01-augustus-gene-1954.31	7.42193	43.4891	-2.55477	0.0305286	0.497256	195446578	195451387	2037
maker-LG02-snap-gene-1830.101	226.106	352.545	-0.640502	0.0305559	0.497256	183068897	183069832	630
maker-LG01-snap-gene-36.11	435.663	167.893	1.37829	0.0305711	0.497256	3596850	3598980	1903
maker-LG06-augustus-gene-171.22	48.6196	99.6508	-1.03653	0.0305991	0.497256	17138555	17144576	2622
maker-LG05-snap-gene-1342.5	138.779	393.377	-1.50245	0.0306117	0.497256	134210485	134215029	2738
maker-LG06-augustus-gene-354.11	0.679863	11.5612	-4.11313	0.0306804	0.497872	35406840	35408554	1527
maker-LG09-snap-gene-502.18	856.166	450.814	0.925104	0.0307272	0.498132	50274648	50282028	5110
maker-LG02-snap-gene-1796.38	638.199	961.359	-0.591381	0.0308947	0.500345	179652307	179655528	1494
maker-LG01-augustus-gene-143.0	858.254	1378.03	-0.682882	0.0309286	0.500394	14381288	14384096	1331
maker-LG07-augustus-gene-1137.41	109.97	58.7619	0.901981	0.0309928	0.500788	113786417	113789451	735
augustus_masked-LG03-processed-gene-27.20	1.01032	10.7561	-3.42214	0.0310149	0.500788	2768223	2768996	774
maker-LG06-augustus-gene-1300.39	954.509	505.489	0.916528	0.0311363	0.502044	130019372	130030881	6609
maker-LG02-snap-gene-1843.36	496.36	846.168	-0.769449	0.031164	0.502044	184362451	184365862	1449
snap_masked-LG01-processed-gene-1657.15	4.397	32.0242	-2.86732	0.0311858	0.502044	165693444	165696154	2062
maker-LG06-snap-gene-247.21	996.69	1560.94	-0.647619	0.0313057	0.503473	24707912	24716121	3724
maker-LG03-augustus-gene-102.30	361.746	207.755	0.797966	0.0316251	0.506186	10274219	10276160	1264
maker-LG08-snap-gene-1133.79	1843.76	1238.59	0.57424	0.0316332	0.506186	113286070	113288799	1053
maker-LG01-snap-gene-2031.41	433.328	174.328	1.3164	0.0316357	0.506186	203120150	203123564	2261
maker-LG03-snap-gene-1563.78	520.082	264.812	0.975376	0.031637	0.506186	156328934	156333274	2731
maker-LG07-snap-gene-267.36	105.069	224.16	-1.09205	0.0316431	0.506186	26744204	26744963	366
snap_masked-LG07-processed-gene-142.23	47.2813	99.8452	-1.07832	0.031671	0.506186	14280893	14282104	612
maker-LG02-snap-gene-1807.57	174.719	315.8	-0.852889	0.0316933	0.506186	180717294	180719161	748
maker-LG01-snap-gene-1876.31	25.1061	1.82081	3.76009	0.031728	0.50624	187639175	187640710	376
maker-LG01-snap-gene-1658.17	466.749	239.148	0.963392	0.0317944	0.506265	165850282	165883987	10548
maker-LG01-snap-gene-1855.30	522.155	926.918	-0.827935	0.0317996	0.506265	185565589	185568371	1151
maker-LG03-augustus-gene-93.9	870.794	1879.99	-1.11044	0.0318333	0.506265	9289755	9293338	1758
augustus_masked-LG06-processed-gene-120.14	0	5.06404	-4.79857	0.0318821	0.506265	11996231	11996851	621
maker-LG01-augustus-gene-793.29	842.261	1502.39	-0.834983	0.0318861	0.506265	79329597	79331203	633
snap_masked-LG02-processed-gene-1485.4	0	8.58863	-5.55794	0.0319275	0.506427	148583454	148584148	420
maker-LG09-augustus-gene-19.18	192.872	118.169	0.706283	0.0320115	0.507261	1975336	1976313	862
maker-LG03-augustus-gene-112.2	225.51	54.5596	2.05301	0.0322397	0.510244	11284295	11286843	2317
snap_masked-LG02-processed-gene-166.1	5.02662	0	4.7662	0.0322628	0.510244	16638931	16639925	929
maker-LG03-augustus-gene-1472.42	25.2948	122.574	-2.27707	0.0325014	0.513515	147185635	147188251	1446
maker-LG07-snap-gene-72.1	193.429	681.583	-1.81668	0.032563	0.513988	7259736	7261172	309
snap_masked-LG02-processed-gene-1726.30	1212.94	497.775	1.28518	0.0325993	0.514058	172671222	172672520	1299
maker-LG01-augustus-gene-1479.0	199.287	114.059	0.80574	0.0327416	0.5158	147952366	147956127	2174
augustus_masked-LG06-processed-gene-1235.17	7.10602	0.282521	4.30301	0.0327886	0.515841	123499903	123500241	339
snap_masked-LG09-processed-gene-62.37	4.9511	0	4.74593	0.032794	1	6237515	6240167	2324
maker-LG08-snap-gene-1176.21	256.116	114.457	1.16355	0.0328696	0.515841	117672253	117674836	2088
snap_masked-LG08-processed-gene-107.5	611.75	2072.06	-1.76003	0.0328716	0.515841	10710377	10715754	2114
maker-LG06-augustus-gene-203.15	1040.64	1795.19	-0.786816	0.0329213	0.515841	20383694	20386747	1352
snap_masked-LG03-processed-gene-1509.15	12.8577	31.3377	-1.289	0.0329553	0.515841	150910873	150914572	2885
snap_masked-LG06-processed-gene-294.4	211.955	103.04	1.03998	0.0329743	0.515841	29454442	29456019	1380
maker-LG08-snap-gene-608.1	305.766	671.971	-1.13641	0.0329951	0.515841	60820329	60821700	842
maker-LG01-snap-gene-874.32	84.0988	37.7972	1.15692	0.0329993	0.515841	87437092	87447247	4220
maker-LG07-snap-gene-1028.0	507.556	166.496	1.60711	0.0330663	0.51639	102783635	102794500	2350
maker-LG06-augustus-gene-207.2	2838.38	9387.87	-1.72574	0.0331371	0.516996	20770456	20772089	888
snap_masked-LG01-processed-gene-31.9	543.439	1091.02	-1.00482	0.0332133	0.517686	3142935	3147064	2799
maker-LG01-snap-gene-1768.59	928.347	1589.57	-0.776217	0.0333121	0.518725	176837475	176840708	2041
maker-LG03-augustus-gene-1532.31	28.4661	74.1083	-1.38005	0.0333921	0.519473	153255856	153259353	1746
snap_masked-LG01-processed-gene-1691.57	0.336774	9.90776	-4.7987	0.0334977	0.519533	169172695	169174412	1142
maker-LG01-snap-gene-3.13	808.064	488.85	0.724722	0.0335038	0.519533	288987	292745	2054
maker-LG07-augustus-gene-894.41	252.378	593.438	-1.23385	0.0335065	0.519533	89474210	89480704	2824
maker-LG01-augustus-gene-1960.26	112.123	62.2922	0.849379	0.0335326	0.519533	196002959	196007524	3339
maker-LG08-augustus-gene-1174.24	25.1328	66.0836	-1.39261	0.0335771	0.519533	117402960	117405653	1585
maker-LG09-augustus-gene-30.59	849.25	2085.31	-1.29575	0.0335887	0.519533	3004623	3006474	1230
maker-LG01-snap-gene-2036.29	174.396	70.7229	1.29658	0.0336473	0.519942	203627513	203628341	747
maker-LG05-augustus-gene-1362.1	57.629	103.537	-0.848806	0.0337582	0.521158	136265037	136266851	1272
augustus_masked-LG01-processed-gene-1823.4	470.238	282.44	0.736887	0.0338366	0.52187	182359202	182360167	966
maker-LG06-snap-gene-118.34	301.064	628.531	-1.06193	0.033974	0.523437	11806409	11808639	987
augustus_masked-LG06-processed-gene-63.54	5.01398	17.589	-1.82193	0.0340276	0.523437	6348710	6350206	1497
maker-LG07-augustus-gene-1212.10	141.508	78.309	0.853958	0.0340352	0.523437	121236056	121243130	3199
augustus_masked-LG07-processed-gene-667.5	1863.42	6222.43	-1.73953	0.0342118	0.525238	66739924	66740742	819
snap_masked-LG06-processed-gene-66.70	55.9762	8.76797	2.65702	0.0342172	0.525238	6654854	6658043	1478
maker-LG06-augustus-gene-1135.19	544.415	359.337	0.599216	0.0343766	0.527184	113494537	113496418	1196
maker-LG09-augustus-gene-951.4	115.355	64.9789	0.822179	0.0345926	0.529994	95077047	95078450	996
maker-LG02-snap-gene-1444.46	87.204	46.6479	0.900974	0.03463	0.530065	144407273	144412520	4464
augustus_masked-LG08-processed-gene-229.14	0.343089	6.15236	-4.12224	0.0346782	0.530301	22943775	22943996	222
maker-LG03-snap-gene-1566.30	366.529	546.208	-0.574915	0.0347478	0.53039	156650249	156653153	1410
snap_masked-LG06-processed-gene-121.56	288.943	714.065	-1.30531	0.0347496	0.53039	12120892	12125557	4168
snap_masked-LG05-processed-gene-132.21	1.37236	17.4312	-3.68005	0.0347996	0.530653	13265597	13266911	842
maker-LG01-snap-gene-1723.56	274.573	430.963	-0.650539	0.0348432	0.530817	172321726	172325148	1484
maker-LG06-snap-gene-1020.4	852.025	2100.87	-1.30206	0.034891	0.531046	102009563	102020869	4134
maker-LG07-snap-gene-1171.53	136.472	234.606	-0.782014	0.0349762	0.531672	117164990	117167617	1077
augustus_masked-LG09-processed-gene-18.30	16.0071	1.95709	3.10503	0.0350135	0.531672	1810879	1813530	2652
maker-LG02-snap-gene-1767.33	8890.28	4831.15	0.879956	0.0350307	0.531672	176757901	176760156	1441
maker-LG06-augustus-gene-198.51	5.6392	0	4.93327	0.0351234	0.531799	19810924	19812509	612
snap_masked-LG01-processed-gene-1977.25	32.4625	105.588	-1.69889	0.0351723	0.531799	197743540	197744934	1395
maker-LG01-snap-gene-21.10	196.176	307.615	-0.648264	0.0351959	0.531799	2106945	2113023	2392
maker-LG03-snap-gene-190.22	274.825	143.127	0.940842	0.0352132	0.531799	19045780	19058186	4738
maker-LG02-snap-gene-1538.6	634.772	429.525	0.563999	0.0352191	0.531799	153851154	153856963	2473
maker-LG09-snap-gene-1105.1	1898.24	6012.74	-1.6634	0.0352363	0.531799	110530556	110533315	2350
maker-LG05-augustus-gene-283.4	2.37636	13.4974	-2.52274	0.0354372	0.533385	28348719	28352643	2497
snap_masked-LG02-processed-gene-174.8	5019.68	19521.8	-1.95943	0.0354873	0.533385	17435527	17437153	932
snap_masked-LG01-processed-gene-50.27	46.549	87.3389	-0.906238	0.0355031	0.533385	5070602	5075136	3700
augustus_masked-LG01-processed-gene-1819.75	680.582	417.553	0.703617	0.0355045	0.533385	181943489	181944835	1347
snap_masked-Contig11-processed-gene-0.25	57.8248	116.766	-1.01455	0.0355063	0.533385	54168	57360	1965
maker-LG08-augustus-gene-1119.48	47.51	20.8755	1.17777	0.035747	0.535591	111919788	111922050	2110
snap_masked-LG01-processed-gene-1863.25	2.73208	17.2673	-2.66836	0.0357479	0.535591	186349267	186350716	1450
maker-LG08-snap-gene-1125.99	40.6798	106.958	-1.39355	0.0357839	0.535591	112575319	112576802	729
maker-LG01-snap-gene-1838.73	0.343089	6.10104	-4.08905	0.0357855	0.535591	183835074	183837808	1631
augustus_masked-LG01-processed-gene-1837.3	29.8387	11.3523	1.38501	0.0358248	0.535683	183697191	183699313	641
maker-LG03-snap-gene-1565.31	382.214	229.713	0.736529	0.0359053	0.536072	156486728	156491022	1616
maker-LG05-augustus-gene-133.22	124.948	67.1145	0.893872	0.0359441	0.536072	13306885	13312077	2183
maker-LG01-snap-gene-1745.7	81.6006	191.124	-1.22818	0.0359502	0.536072	174495794	174500479	2164
maker-LG06-augustus-gene-1312.38	454.671	193.877	1.23179	0.0360417	0.536941	131280159	131282828	1713
snap_masked-LG09-processed-gene-603.18	808.484	1187.89	-0.554814	0.0360897	0.537162	60316101	60320603	2854
maker-LG01-snap-gene-1921.27	21.4492	54.6867	-1.35075	0.0362068	0.538324	192136370	192140994	2066
snap_masked-LG01-processed-gene-1711.49	37.2389	11.1333	1.72459	0.0362413	0.538324	171146285	171149159	1689
augustus_masked-LG06-processed-gene-19.52	1779.51	1108.06	0.683677	0.0362805	0.538324	1877857	1881953	2611
augustus_masked-LG07-processed-gene-366.9	305.26	149.765	1.02818	0.0363287	0.538324	36598874	36602782	3642
maker-LG06-augustus-gene-218.27	210.942	330.274	-0.647481	0.0363342	0.538324	21821071	21827582	3040
maker-LG02-snap-gene-1185.5	194.869	402.756	-1.04851	0.0363951	0.538734	118491898	118496564	3188
maker-LG08-augustus-gene-1138.72	567.684	1067.08	-0.910629	0.0365258	0.540144	113880410	113884125	1772
maker-LG01-augustus-gene-1838.12	2444.4	4772.31	-0.965087	0.0366204	0.540144	183791660	183795160	1583
maker-LG03-augustus-gene-1558.41	1378.46	2057.67	-0.577806	0.0366487	0.540144	155813058	155822450	4219
maker-LG09-snap-gene-950.1	266.297	142.884	0.896265	0.0367198	0.540144	95050437	95065889	3540
maker-LG06-augustus-gene-18.44	346.907	195.755	0.822845	0.0367252	0.540144	1813816	1816681	1740
snap_masked-LG09-processed-gene-31.61	418.1	212.381	0.979169	0.0367473	0.540144	3147465	3148948	1233
augustus_masked-LG05-processed-gene-903.2	2757.21	1890.23	0.544415	0.0367735	0.540144	90376614	90379412	2115
snap_masked-LG05-processed-gene-157.7	65.2399	28.4586	1.1903	0.0367842	0.540144	15719686	15721335	1011
snap_masked-LG08-processed-gene-907.1	328.587	159.139	1.04389	0.0367908	0.540144	90735082	90735324	243
maker-LG06-snap-gene-280.15	6.77556	0.282521	4.23412	0.0368638	0.540209	28057376	28059464	1395
snap_masked-LG01-processed-gene-1813.41	376.4	765.758	-1.02466	0.0369	0.540209	181339069	181342728	2397
snap_masked-LG07-processed-gene-1172.27	593.304	1228.37	-1.04958	0.0369601	0.540209	117210200	117212835	1472
maker-LG03-augustus-gene-160.5	23.0733	6.52863	1.81461	0.0370373	0.540209	16064894	16070195	4332
snap_masked-LG01-processed-gene-1625.28	0	14.2871	-6.28584	0.0370432	0.540209	162545090	162546031	942
maker-LG07-augustus-gene-1171.46	262.565	104.316	1.33241	0.0370527	0.540209	117141588	117144210	2289
maker-LG06-augustus-gene-1270.16	35.5774	12.0035	1.59484	0.0370669	0.540209	127013430	127015170	1501
snap_masked-LG05-processed-gene-1329.3	328.251	141.639	1.21524	0.037092	0.540209	132979453	132981285	1833
snap_masked-LG01-processed-gene-1945.1	224.87	109.84	1.03266	0.0370957	0.540209	194482810	194491164	5711
maker-LG07-snap-gene-414.4	439.94	269.112	0.709836	0.0371398	0.540363	41414474	41417197	705
maker-LG06-augustus-gene-38.10	39.9137	17.0865	1.22758	0.0372198	0.540993	3858825	3860903	1295
maker-LG01-snap-gene-1969.61	21.7187	61.6568	-1.50303	0.0372499	0.540993	196920774	196923151	1880
maker-LG06-snap-gene-140.28	20.241	4.00766	2.30946	0.0373601	0.54177	14002252	14008176	2682
augustus_masked-LG08-processed-gene-393.2	468.761	294.948	0.667552	0.0373991	0.54177	39313423	39315097	1149
maker-Contig4-snap-gene-5.65	370.302	196.943	0.909426	0.0374366	0.54177	535637	537766	1796
snap_masked-LG05-processed-gene-1394.61	237.318	106.608	1.15969	0.0374437	0.54177	139436932	139439034	1140
maker-LG03-snap-gene-1558.59	102.237	161.141	-0.655695	0.0374708	0.54177	155786291	155789261	1343
snap_masked-LG02-processed-gene-1554.24	18.8589	58.128	-1.6248	0.0375881	0.542567	155401631	155402086	456
maker-LG06-augustus-gene-31.30	355.932	679.454	-0.932519	0.0376361	0.542567	3098016	3103808	2966
maker-LG06-augustus-gene-59.11	46.8781	10.7986	2.12038	0.0376513	0.542567	5960951	5965733	1989
maker-LG01-snap-gene-1848.1	9.71646	1.25537	2.91104	0.0376868	0.542567	184862616	184865582	1049
augustus_masked-LG05-processed-gene-72.14	205.415	495.145	-1.27028	0.0376937	0.542567	7193474	7195169	657
maker-LG01-augustus-gene-1936.5	132.096	278.488	-1.07445	0.0377807	0.542884	193598034	193602429	1783
maker-LG06-augustus-gene-285.19	686.688	1263.27	-0.879367	0.0378031	0.542884	28509007	28512663	1640
maker-LG03-augustus-gene-1577.74	237.269	139.868	0.759774	0.0378163	0.542884	157759045	157762675	2413
maker-LG06-snap-gene-117.5	249.191	533.565	-1.09889	0.0379042	0.543663	11779555	11784859	1693
maker-LG05-augustus-gene-422.4	234.587	146.905	0.678711	0.0379671	0.544082	42185613	42190890	3148
maker-LG02-snap-gene-1842.42	634.744	1478.67	-1.21961	0.0380352	0.544315	184238400	184243864	3283
maker-LG01-snap-gene-1800.16	94.063	38.1592	1.29595	0.0380506	0.544315	180038853	180043091	2778
maker-LG01-snap-gene-1644.1	517.123	842.778	-0.704189	0.038127	0.544407	164469046	164472994	2355
augustus_masked-LG09-processed-gene-793.1	217.168	122.333	0.825684	0.0381406	0.544407	79344789	79345922	1134
maker-LG01-augustus-gene-70.37	364.435	601.456	-0.72264	0.0381916	0.544407	7076945	7078946	1299
maker-LG01-snap-gene-793.43	19.994	3.1817	2.71561	0.0381916	0.544407	79301818	79306884	3466
snap_masked-LG01-processed-gene-1697.8	250.492	138.217	0.855753	0.0382498	0.544757	169760821	169764014	1764
maker-LG01-snap-gene-1591.14	18.9514	117.487	-2.63299	0.0382989	0.544977	159120594	159124057	2278
maker-LG01-snap-gene-1849.15	8.87486	0.648569	3.75315	0.0383578	0.545334	184916642	184919753	2018
snap_masked-LG03-processed-gene-19.8	2.70682	16.7935	-2.64909	0.0384765	0.546536	1903340	1908564	2498
maker-LG06-augustus-gene-342.0	655.981	417.401	0.65333	0.0385099	0.546536	34201444	34207217	4120
maker-LG01-snap-gene-1595.39	0	7.84826	-5.42944	0.0386065	0.547427	159492826	159495080	1942
maker-LG05-augustus-gene-83.15	0	7.94384	-5.43644	0.0386448	0.54749	8293457	8295514	1221
snap_masked-LG05-processed-gene-1336.78	50.4299	6.76061	2.91711	0.0386846	0.547575	133661207	133665800	1739
maker-LG08-snap-gene-1183.3	55.9473	24.0571	1.23086	0.038754	0.547634	118367404	118368264	631
maker-LG01-snap-gene-113.1	216.609	469.946	-1.11632	0.0388106	0.547634	11292957	11294778	807
maker-LG08-snap-gene-1145.7	188.659	386.354	-1.03413	0.038872	0.547634	114545689	114550757	2050
maker-LG07-snap-gene-895.7	48.3409	169.949	-1.81623	0.0388963	0.547634	89508027	89517032	4155
snap_masked-LG01-processed-gene-1809.24	33.1307	8.73786	1.93562	0.0389324	0.547634	180943535	180943963	429
maker-LG06-augustus-gene-1302.0	19.9441	4.38471	2.19237	0.0389395	0.547634	130269121	130270509	1203
maker-LG01-snap-gene-552.1	212.324	101.415	1.06344	0.0389601	0.547634	55267056	55269005	1241
snap_masked-LG07-processed-gene-803.10	337.251	533.2	-0.660488	0.0390243	0.547634	80360945	80369069	4881
augustus_masked-Contig21-processed-gene-1.17	656.024	947.172	-0.529862	0.0390256	0.547634	230143	236541	3044
augustus_masked-LG05-processed-gene-454.1	301.617	162.349	0.892883	0.0390272	0.547634	45427573	45428112	540
maker-Contig2-snap-gene-4.44	520.452	759.017	-0.544019	0.0390876	0.548006	458515	465989	2197
snap_masked-LG09-processed-gene-62.32	15.5538	3.12894	2.3373	0.0391292	0.548114	6218509	6220214	1497
maker-LG08-snap-gene-1129.35	208.187	116.612	0.837195	0.0392829	0.549412	112922108	112925637	1775
maker-LG01-snap-gene-1676.12	1241.17	846.459	0.551613	0.0393227	0.549412	167596467	167619921	8061
snap_masked-LG07-processed-gene-1196.74	1535.09	462.204	1.73231	0.0393237	0.549412	119651941	119653842	1374
maker-LG01-augustus-gene-1823.33	9.0701	25.7618	-1.51193	0.0394395	0.550375	182341620	182342451	405
augustus_masked-LG05-processed-gene-649.10	371.689	598.576	-0.687602	0.0394607	0.550375	64937244	64939823	2003
maker-LG06-snap-gene-184.15	106.55	184.599	-0.791891	0.0396167	0.552074	18405821	18408287	753
augustus_masked-LG06-processed-gene-253.3	2.00389	13.7468	-2.78491	0.0396746	0.55239	25384815	25385488	583
augustus_masked-LG01-processed-gene-990.54	5.9573	0.408202	4.05074	0.0397076	0.55239	99019593	99020012	420
augustus_masked-LG03-processed-gene-1583.69	110.041	53.2023	1.05343	0.0397882	0.552909	158301298	158302629	1332
maker-LG06-augustus-gene-405.12	94.1835	47.0208	0.997437	0.0398223	0.552909	40547788	40552608	3128
maker-LG06-augustus-gene-183.15	6.48806	0.282521	4.17606	0.0398738	0.552909	18333146	18339208	4780
maker-LG07-snap-gene-752.5	4.73597	28.0051	-2.57165	0.0399134	0.552909	75275519	75276274	655
snap_masked-LG02-processed-gene-1683.12	4115.38	2236.46	0.879806	0.0399158	0.552909	168338387	168339700	1314
augustus_masked-LG02-processed-gene-53.4	1560.49	725.843	1.10467	0.0399548	0.552976	5300380	5301597	1218
maker-LG01-snap-gene-1752.87	43.8528	135.526	-1.6283	0.0399914	0.553004	175230131	175233391	2149
maker-LG09-augustus-gene-390.3	139.522	45.5575	1.62291	0.0400252	0.553004	39072628	39073443	711
maker-LG08-snap-gene-227.14	6.17023	22.9971	-1.89973	0.0403192	0.556591	22714527	22718853	1590
snap_masked-LG09-processed-gene-78.50	429.172	276.988	0.63168	0.0403944	0.556943	7809456	7823288	4717
snap_masked-LG06-processed-gene-225.1	473.701	252.911	0.907667	0.0404135	0.556943	22548126	22550005	1265
maker-LG06-augustus-gene-138.59	263.884	859.068	-1.70311	0.0405234	0.557622	13868494	13872286	1859
maker-LG06-snap-gene-183.30	12.0394	2.14509	2.44985	0.0406002	0.557622	18366439	18370803	1569
maker-LG06-snap-gene-341.30	544.749	296.943	0.873926	0.0406003	0.557622	34125502	34128611	2522
snap_masked-LG07-processed-gene-1221.93	177.757	111.982	0.666604	0.0406252	0.557622	122164359	122169768	4149
snap_masked-LG06-processed-gene-180.26	422.019	250.614	0.752004	0.0406352	0.557622	18041755	18044910	1245
maker-LG09-snap-gene-27.46	256.673	160.084	0.681319	0.0406824	0.557797	2702651	2704924	1939
maker-LG03-augustus-gene-68.18	198.62	304.456	-0.617154	0.0407536	0.558029	6863452	6865542	974
snap_masked-LG07-processed-gene-1193.46	246.485	120.708	1.03348	0.0407683	0.558029	119323135	119324286	350
maker-LG06-snap-gene-158.25	4.6709	0	4.66079	0.0408064	1	15825673	15832315	2599
snap_masked-LG06-processed-gene-84.39	2750	1593.91	0.787253	0.0408357	0.558479	8419089	8423080	1358
maker-LG07-snap-gene-954.1	1298.07	883.791	0.554752	0.040872	0.558503	95439465	95444318	2911
maker-LG06-snap-gene-1257.8	169.782	268.626	-0.6636	0.0409941	0.559699	125760448	125762341	1230
maker-LG01-augustus-gene-1786.6	23.6789	5.91122	1.98134	0.0412909	0.562532	178648699	178649234	432
maker-LG08-augustus-gene-1186.42	256.537	129.329	0.989892	0.041299	0.562532	118674796	118680964	3752
maker-LG06-augustus-gene-1230.36	353.732	565.604	-0.676212	0.0413472	0.562532	123045562	123051696	3881
maker-LG01-snap-gene-1798.27	14.2145	50.3533	-1.82831	0.0413717	0.562532	179825951	179829186	2847
maker-LG05-snap-gene-98.64	1064.16	718.76	0.565782	0.0413754	0.562532	9810371	9816805	5327
snap_masked-LG01-processed-gene-1903.33	183.353	67.9098	1.43116	0.0414679	0.563316	190373482	190381171	3460
maker-LG05-augustus-gene-94.69	14.9415	41.4132	-1.46967	0.0415492	0.563873	9390947	9391709	521
maker-LG01-snap-gene-1818.11	306.082	712.905	-1.21922	0.0415787	0.563873	181817854	181818691	339
maker-LG05-snap-gene-1085.9	390.813	552.063	-0.49868	0.0416597	0.564408	108519857	108523413	2141
maker-LG05-augustus-gene-235.18	84.6398	176.065	-1.05844	0.0416878	0.564408	23571804	23573913	706
snap_masked-LG01-processed-gene-213.23	21.5259	1.90394	3.48211	0.0417991	0.565041	21307066	21310361	1772
snap_masked-LG01-processed-gene-1579.51	130.681	50.1575	1.38892	0.0418044	0.565041	157959433	157962894	3074
augustus_masked-LG03-processed-gene-929.1	779.11	375.645	1.05315	0.0418821	0.565619	92891108	92892652	1545
snap_masked-LG09-processed-gene-92.21	614.158	351.793	0.805622	0.0419715	0.566219	9239582	9243934	2633
maker-LG06-augustus-gene-139.40	14.6212	3.73575	1.98214	0.0419966	0.566219	13887230	13888675	1178
snap_masked-LG01-processed-gene-1640.2	26.6795	7.87853	1.76914	0.0421902	0.56813	163989186	163989906	324
maker-LG01-snap-gene-1868.11	79.3268	220.95	-1.47805	0.0423344	0.56813	186884737	186887556	2304
snap_masked-LG02-processed-gene-1751.32	238.757	146.24	0.708404	0.0423361	0.56813	175146875	175150274	1850
augustus_masked-LG03-processed-gene-74.2	311.19	195.144	0.670828	0.0423568	0.56813	7398712	7401390	2679
maker-LG03-augustus-gene-75.57	191.771	122.427	0.64851	0.0423598	0.56813	7533855	7534725	414
maker-LG09-snap-gene-78.20	79.4162	41.7821	0.924474	0.0423613	0.56813	7852972	7866068	6715
maker-LG06-snap-gene-643.21	662.703	1034.86	-0.642462	0.0424096	0.56813	64308536	64310162	667
snap_masked-LG02-processed-gene-1689.1	71.7349	194.718	-1.43981	0.0424192	0.56813	168955630	168955941	312
maker-LG01-augustus-gene-2035.26	278.631	402.603	-0.530855	0.0425357	0.569219	203567302	203571238	2016
maker-LG06-snap-gene-301.21	55.2626	20.3719	1.43999	0.042655	0.570344	30150046	30150973	445
augustus_masked-LG03-processed-gene-21.52	12.6027	33.7067	-1.4104	0.0427848	0.570567	2183789	2184208	420
maker-LG06-augustus-gene-169.36	2607.52	9478.53	-1.862	0.0427913	0.570567	16905779	16909863	1916
maker-LG06-augustus-gene-1308.52	1217.48	1711.13	-0.490877	0.0427948	0.570567	130817940	130820370	1695
maker-LG01-snap-gene-1926.52	11.2095	1.86218	2.54943	0.0428128	0.570567	192630498	192634176	2928
maker-LG03-augustus-gene-1549.30	9.92088	1.70573	2.56121	0.042862	0.570752	154896673	154898092	830
maker-LG01-snap-gene-1821.9	568.454	338.941	0.746749	0.0429447	0.570796	182174656	182175797	952
augustus_masked-LG09-processed-gene-256.2	764.293	1085.99	-0.507121	0.0430134	0.570796	25587588	25590288	1110
maker-LG03-snap-gene-1309.1	1058.56	1616.99	-0.610867	0.0430283	0.570796	130966425	130969671	955
snap_masked-LG02-processed-gene-1502.15	76.7523	129.381	-0.753902	0.0430498	0.570796	150213539	150215296	1758
maker-LG06-augustus-gene-72.31	82.4134	231.187	-1.48862	0.0430574	0.570796	7241512	7245405	2956
snap_masked-LG03-processed-gene-1345.4	384.992	236.856	0.699748	0.0430769	0.570796	134571039	134573794	1449
augustus_masked-LG09-processed-gene-77.31	8.24964	22.099	-1.42439	0.0432592	0.572614	7722763	7722954	192
augustus_masked-LG06-processed-gene-133.24	10.2766	56.7312	-2.46573	0.0433296	0.572614	13290267	13291074	720
maker-LG03-snap-gene-1583.94	244.071	450.451	-0.883071	0.0433489	0.572614	158337697	158340783	1668
maker-Contig3-augustus-gene-5.7	63.2214	27.2876	1.19876	0.0433557	0.572614	559242	563380	2510
maker-LG01-snap-gene-1791.68	301.745	527.734	-0.805408	0.0434849	0.573851	179170412	179171727	391
maker-LG09-augustus-gene-399.9	275.659	454.783	-0.721694	0.0435691	0.574154	39978620	39983134	1311
maker-LG01-snap-gene-1704.9	2148.41	3843.99	-0.839355	0.0436017	0.574154	170421551	170424425	879
maker-LG01-snap-gene-1821.8	181.613	79.7025	1.19378	0.0436143	0.574154	182170925	182172465	1356
maker-LG02-snap-gene-1658.17	367.78	91.223	2.0148	0.0436583	0.574266	165880399	165881902	1252
maker-LG06-augustus-gene-216.33	835.209	1329.43	-0.670579	0.0437357	0.574817	21672508	21676465	1487
snap_masked-LG02-processed-gene-321.4	30.8806	11.2999	1.43133	0.0438116	0.575348	32184031	32184993	811
maker-LG01-snap-gene-1783.1	720.532	387.239	0.89693	0.0438916	0.575636	178338847	178340723	1502
maker-LG01-snap-gene-42.11	447.065	178.614	1.32626	0.0439047	0.575636	4270799	4273128	1452
maker-LG02-snap-gene-1834.94	188.11	295.558	-0.651817	0.043949	0.57575	183485895	183487509	850
maker-LG01-snap-gene-1948.15	16.5085	63.8534	-1.95333	0.0440521	0.576634	194859199	194862044	2718
maker-LG03-snap-gene-1579.71	550.376	364.412	0.595348	0.0441687	0.577692	157970212	157971306	790
maker-LG05-augustus-gene-606.2	165.802	369.666	-1.1571	0.0442291	0.578016	60652815	60656704	1741
maker-LG06-snap-gene-1152.4	151.673	81.3875	0.899618	0.044324	0.578453	115220038	115223545	2008
maker-LG03-augustus-gene-1532.27	390.689	223.295	0.807148	0.0443341	0.578453	153232836	153238673	4648
maker-LG01-snap-gene-1870.28	4721.35	2312.12	1.03024	0.0444792	0.579606	187000654	187003929	2331
maker-LG06-snap-gene-244.44	64.9662	112.965	-0.795834	0.0444942	0.579606	24433471	24434946	1067
maker-LG06-snap-gene-204.67	197.711	129.052	0.615383	0.0445672	0.58009	20407447	20409940	1722
maker-LG01-snap-gene-2013.7	386.413	125.158	1.6254	0.0447162	0.581562	201289619	201296774	2230
maker-LG01-snap-gene-1233.20	8.11442	29.5824	-1.87485	0.044763	0.581704	123351503	123354840	1624
snap_masked-LG01-processed-gene-1608.15	649.82	1014.09	-0.642228	0.0448206	0.581985	160816269	160818256	1072
maker-LG03-snap-gene-1561.22	253.119	129.614	0.963179	0.0449622	0.583355	156090444	156093112	1869
maker-LG08-augustus-gene-1126.12	1183.45	583.08	1.02222	0.0450365	0.583388	112633848	112635035	1001
maker-LG02-snap-gene-1805.42	128.934	390.1	-1.5979	0.0450369	0.583388	180559901	180563988	1601
snap_masked-LG01-processed-gene-1972.34	24.6554	73.7817	-1.57745	0.0451338	0.583602	197264998	197266221	1224
maker-LG09-augustus-gene-98.20	430.315	655.337	-0.607348	0.0451608	0.583602	9833728	9838175	2427
maker-LG06-augustus-gene-117.21	328.82	182.188	0.854747	0.0451616	0.583602	11788076	11789174	923
augustus_masked-LG09-processed-gene-218.33	100.678	358.996	-1.8347	0.0453992	0.585941	21873935	21878088	2971
maker-LG06-snap-gene-285.48	898.16	1323.17	-0.559311	0.045415	0.585941	28583209	28584638	1056
maker-LG05-augustus-gene-1371.12	624.946	1132.95	-0.857731	0.0455066	0.58659	137188088	137189741	1327
augustus_masked-LG03-processed-gene-1564.3	1430.84	3120.91	-1.12514	0.0455378	0.58659	156411419	156414424	2068
snap_masked-LG02-processed-gene-1776.25	2274.29	630.186	1.85209	0.0456277	0.586864	177652069	177652701	633
augustus_masked-LG06-processed-gene-175.34	172.825	355.311	-1.04068	0.0456317	0.586864	17499756	17500409	654
maker-LG05-augustus-gene-88.27	12.5427	0.973244	3.68005	0.0457721	0.588203	8799654	8800489	695
snap_masked-Contig15-processed-gene-1.14	0	4.499	-4.62642	0.0458091	1	91972	98068	4766
maker-LG01-snap-gene-223.41	735.778	1025.14	-0.478271	0.045824	0.588402	22294693	22298676	2158
maker-LG07-snap-gene-1182.32	9456.19	6657.94	0.506096	0.0458878	0.588755	118273778	118281680	3899
maker-LG01-snap-gene-1942.31	562.854	355.305	0.66459	0.0459752	0.589375	194263774	194267715	2839
augustus_masked-LG06-processed-gene-63.57	37.3102	94.847	-1.34531	0.046009	0.589375	6374051	6375166	1116
maker-LG02-snap-gene-1811.46	178.333	278.862	-0.647097	0.0460822	0.589845	181170437	181174523	2660
maker-LG05-augustus-gene-1170.13	213.78	467.975	-1.13118	0.0461918	0.59078	117010391	117012017	873
maker-LG06-snap-gene-244.42	1.02295	7.94201	-2.98375	0.0463435	0.592062	24417029	24426592	782
snap_masked-LG01-processed-gene-1729.30	19.3297	4.54077	2.07969	0.0463986	0.592062	172936387	172937145	759
augustus_masked-LG06-processed-gene-280.21	161.941	56.2741	1.52735	0.0464086	0.592062	28026615	28027520	906
maker-LG01-snap-gene-1849.2	292.636	177	0.724678	0.0464384	0.592062	184898469	184904361	3420
snap_masked-LG07-processed-gene-126.15	8.62843	24.7338	-1.52403	0.0464976	0.59235	12614738	12615703	699
maker-LG01-snap-gene-1819.43	1289.27	2011.78	-0.641838	0.0466042	0.593195	181900963	181904824	2526
augustus_masked-LG08-processed-gene-229.12	129.608	302.657	-1.22349	0.0466615	0.593195	22920737	22925880	2433
maker-LG02-augustus-gene-1762.36	320.298	742.357	-1.21287	0.0466739	0.593195	176267877	176273656	2497
maker-LG08-snap-gene-1130.2	16.7552	4.38471	1.94277	0.0467777	0.594048	113011266	113012191	831
maker-LG02-augustus-gene-1681.1	678.123	1068.63	-0.65576	0.0469516	0.595674	168099099	168100919	1300
augustus_masked-LG09-processed-gene-128.36	21.144	54.6475	-1.37302	0.0469794	0.595674	12808757	12817169	3378
snap_masked-LG01-processed-gene-1746.11	8.97975	1.14069	3.06367	0.0470391	0.595964	174631610	174633001	1392
maker-LG01-augustus-gene-1612.34	1019.3	1533.84	-0.589546	0.0471187	0.596505	161260823	161265368	2217
snap_masked-LG08-processed-gene-989.0	30.1502	5.50523	2.49111	0.047209	0.597181	98954328	98954624	297
maker-LG08-augustus-gene-949.5	109.18	280.88	-1.3616	0.0473225	0.597585	94951187	94959468	5599
maker-LG02-snap-gene-1726.20	429.733	736.208	-0.777149	0.0473424	0.597585	172677771	172680190	1298
maker-LG06-augustus-gene-171.19	151.018	98.1912	0.6217	0.0473517	0.597585	17149957	17153617	1451
maker-LG06-augustus-gene-335.16	308.668	455.344	-0.560088	0.0474817	0.598757	33497731	33500837	1681
maker-LG01-augustus-gene-1935.65	34.538	74.2509	-1.10774	0.0475574	0.59921	193565923	193569050	1610
maker-LG01-augustus-gene-128.4	10.3249	1.78965	2.57658	0.0475951	0.59921	12865996	12871044	3248
maker-LG03-augustus-gene-1491.37	75.1884	30.1965	1.31694	0.0476287	0.59921	149132315	149133795	616
maker-LG06-augustus-gene-207.7	114.715	195.589	-0.769525	0.0477425	0.600176	20763838	20768324	1887
maker-LG05-snap-gene-98.62	154.405	256.216	-0.729565	0.047864	0.600993	9798888	9804689	1445
maker-LG06-augustus-gene-25.1	25.0039	6.68508	1.88864	0.0478818	0.600993	2497580	2499685	1683
maker-LG03-snap-gene-1426.5	149.029	75.9172	0.974797	0.048056	0.602711	142662727	142665914	2664
snap_masked-LG03-processed-gene-101.97	0.336774	5.60931	-3.97056	0.0482273	0.60433	10155901	10156251	351
maker-LG01-snap-gene-1859.24	202.56	338.127	-0.740658	0.0482987	0.60433	185930074	185931732	1178
maker-Contig35-snap-gene-0.70	525.612	745.117	-0.503453	0.0483112	0.60433	109930	111815	1543
maker-LG07-snap-gene-1182.26	120.706	66.7864	0.847871	0.0483753	0.60433	118234932	118239079	2905
maker-LG06-snap-gene-1275.64	314.363	202.235	0.637305	0.0483779	0.60433	127503936	127508557	2244
maker-LG03-augustus-gene-1559.60	187.543	70.6618	1.41419	0.0484922	0.60433	155926499	155930095	2317
maker-LG09-augustus-gene-62.17	988.112	605.979	0.705716	0.0485235	0.60433	6215569	6218302	2116
snap_masked-Contig35-processed-gene-0.12	13.5793	76.4153	-2.48961	0.0485434	0.60433	49739	52746	2530
maker-LG03-augustus-gene-1477.42	106.76	61.4104	0.800716	0.0485858	0.60433	147708761	147711948	2558
snap_masked-LG01-processed-gene-1864.44	6.97394	20.7915	-1.57269	0.0485897	0.60433	186429897	186431075	1179
maker-LG06-augustus-gene-1266.2	94.7004	31.4746	1.58114	0.0486319	0.60433	126647739	126651141	2595
snap_masked-LG01-processed-gene-1878.30	144.139	64.6274	1.16101	0.0486333	0.60433	187800696	187801661	966
augustus_masked-LG08-processed-gene-934.20	366.288	200.561	0.871708	0.048698	0.60467	93464154	93466910	2757
maker-LG06-augustus-gene-754.5	230.639	388.886	-0.755374	0.0488442	0.60602	75425662	75428629	790
maker-LG01-augustus-gene-1763.34	500.906	326.358	0.617441	0.0490302	0.607862	176331177	176334256	2604
maker-LG07-snap-gene-1224.59	381.964	655.468	-0.779582	0.0491252	0.608573	122471509	122475444	1019
snap_masked-LG09-processed-gene-160.0	0.343089	8.56086	-4.57974	0.0492087	0.609105	16018820	16019743	705
maker-LG02-snap-gene-297.12	49.3828	118.35	-1.26124	0.0492709	0.609105	29689917	29691124	641
snap_masked-LG01-processed-gene-1900.16	438.856	261.378	0.748866	0.0492811	0.609105	190052147	190055318	2739
maker-LG02-augustus-gene-14.4	238.448	574.361	-1.26851	0.049395	0.610047	1451627	1454137	1056
maker-LG01-snap-gene-1796.41	953.094	288.95	1.72313	0.0495328	0.610917	179673820	179675495	1029
maker-LG09-augustus-gene-134.11	833.988	1550.34	-0.894472	0.049541	0.610917	13416209	13418597	1574
maker-LG01-snap-gene-1784.54	42.6313	73.6237	-0.788987	0.0496583	0.611472	178385294	178388149	1376
maker-LG06-augustus-gene-495.72	179.254	73.0581	1.29636	0.0496985	0.611472	49550323	49554225	1718
maker-LG09-snap-gene-22.46	97.3712	35.553	1.45023	0.0497371	0.611472	2205057	2207203	1112
maker-Contig12-snap-gene-2.0	4.77799	21.6588	-2.19089	0.0497371	0.611472	195344	200125	2996
maker-LG07-snap-gene-109.3	123.783	62.4157	0.985581	0.0498652	0.612581	10969234	10972692	3336
maker-LG06-snap-gene-1098.18	581.504	1052.14	-0.855705	0.0500678	0.614603	109798318	109805545	2638
maker-LG01-snap-gene-1862.17	335.343	184.929	0.858668	0.0501344	0.614705	186237181	186238510	1175
maker-LG08-augustus-gene-15.0	3703.91	1895.22	0.966881	0.0501521	0.614705	1557285	1560313	1752
maker-LG01-augustus-gene-1540.11	273.221	537.534	-0.976667	0.0502177	0.615043	154014847	154021279	4104
maker-LG08-augustus-gene-1146.51	290.291	186.126	0.638909	0.050488	0.616648	114648898	114657448	5001
maker-LG06-augustus-gene-322.33	20.6037	68.7794	-1.74366	0.0506212	0.616648	32282624	32285086	1747
maker-LG06-augustus-gene-1257.36	170.11	280.728	-0.723289	0.0506226	0.616648	125756631	125760141	1093
snap_masked-LG01-processed-gene-1935.28	40.3406	15.98	1.35499	0.0506275	0.616648	193494574	193495080	507
augustus_masked-LG09-processed-gene-1123.26	9.1014	35.0838	-1.95332	0.0506349	0.616648	112413076	112413240	165
augustus_masked-LG09-processed-gene-47.30	67.7294	35.3776	0.935627	0.0506369	0.616648	4736219	4736722	504
maker-LG06-snap-gene-1227.13	306.591	678.658	-1.14676	0.0506512	0.616648	122687205	122689908	2484
maker-LG03-augustus-gene-1547.52	215.67	365.445	-0.762158	0.0506536	0.616648	154749668	154751280	1068
maker-LG07-snap-gene-1083.6	416.536	652.852	-0.648807	0.0509099	0.618351	108353516	108357621	2896
augustus_masked-LG06-processed-gene-1283.8	112868	66656.5	0.759822	0.0509125	0.618351	128355018	128355806	789
maker-LG08-augustus-gene-1104.2	57.4281	21.1888	1.4313	0.0509434	0.618351	110481208	110484434	2609
snap_masked-LG01-processed-gene-135.2	182.439	354.773	-0.958477	0.050966	0.618351	13491567	13494614	3048
maker-LG01-augustus-gene-1685.53	534.172	831.364	-0.638201	0.0509846	0.618351	168587086	168589112	941
maker-LG09-snap-gene-447.0	16.1501	42.7307	-1.40841	0.0510909	0.619176	44696370	44698530	1399
snap_masked-LG05-processed-gene-63.3	26.181	9.17722	1.52057	0.0511668	0.619441	6359013	6359204	192
maker-LG01-snap-gene-19.15	412.864	3357.03	-3.02338	0.051206	0.619441	1879656	1893139	4036
maker-LG09-augustus-gene-21.73	102.117	233.103	-1.18898	0.0512276	0.619441	2123243	2127494	2564
snap_masked-LG01-processed-gene-1614.40	13.9833	3.93435	1.82391	0.0515025	0.621921	161470293	161471399	1107
maker-LG05-augustus-gene-1300.15	73.913	178.358	-1.26874	0.0515096	0.621921	130087855	130089150	867
maker-LG01-snap-gene-1850.28	10.1989	1.38145	2.91271	0.0516798	0.6234	185086045	185088000	837
augustus_masked-LG02-processed-gene-1814.20	689.245	416.288	0.727302	0.0517342	0.6234	181415668	181419899	3634
maker-LG01-snap-gene-1731.6	56.3575	18.0059	1.63177	0.0517506	0.6234	173121375	173124977	1727
snap_masked-LG08-processed-gene-1145.45	1721.46	1200.45	0.519603	0.0518157	0.6234	114522528	114531101	3206
maker-LG07-snap-gene-1233.62	635.497	1083.68	-0.769951	0.0518766	0.6234	123311795	123314172	704
maker-LG05-snap-gene-575.11	856.562	2149.04	-1.32709	0.0519057	0.6234	57558577	57566319	2741
maker-LG01-snap-gene-1827.39	6.76513	0.606805	3.40429	0.0519398	0.6234	182758557	182760334	1077
maker-LG01-augustus-gene-1108.3	120.1	40.1803	1.57371	0.0519404	0.6234	110803328	110804524	438
snap_masked-LG01-processed-gene-1842.45	213.381	128.123	0.732796	0.0520603	0.624048	184246801	184250582	1156
maker-LG03-augustus-gene-43.27	2478.33	1275.32	0.958839	0.0521077	0.624048	4361881	4362903	918
maker-LG02-snap-gene-262.0	13.377	3.73575	1.85306	0.0521512	0.624048	26187775	26190027	1536
maker-LG08-augustus-gene-1069.25	452.017	801.018	-0.825524	0.0521538	0.624048	106962483	106968368	1637
maker-Contig11-augustus-gene-0.42	67.6329	119.644	-0.819372	0.0521872	0.624048	20906	26395	1878
maker-LG01-augustus-gene-1684.28	82.3891	257.21	-1.64123	0.0522486	0.624321	168449954	168452294	1755
maker-LG05-snap-gene-1372.9	641.754	937.185	-0.546339	0.052336	0.624421	137231976	137233486	666
snap_masked-LG06-processed-gene-353.23	334.551	525.157	-0.650087	0.0523762	0.624421	35350085	35352244	819
maker-LG09-augustus-gene-44.45	206.625	461.232	-1.15949	0.0523931	0.624421	4449196	4450918	960
maker-LG02-snap-gene-1808.26	2.56842	13.6132	-2.3981	0.0524114	0.624421	180802482	180803624	1048
maker-LG01-snap-gene-883.10	1161.12	708.863	0.711429	0.0524576	0.624511	88363511	88370342	3572
snap_masked-LG02-processed-gene-288.4	385.193	794.694	-1.04497	0.0525219	0.624586	28797917	28805486	2503
maker-LG07-snap-gene-489.9	356.565	570.498	-0.67844	0.0525999	0.624586	48935726	48939195	1781
maker-LG01-snap-gene-1791.67	497.822	298.476	0.739263	0.0526161	0.624586	179113326	179117095	2317
maker-LG09-snap-gene-68.0	7.87207	0	5.41661	0.0526183	0.624586	6810739	6812117	1188
maker-LG03-augustus-gene-1560.8	50.3132	21.5847	1.22105	0.0527711	0.625375	156000636	156000864	138
maker-LG01-snap-gene-35.54	459.18	817.993	-0.832287	0.0528114	0.625375	3521089	3525553	2713
maker-LG09-snap-gene-105.34	41.6194	14.5667	1.51678	0.052814	0.625375	10551798	10558285	4106
maker-LG02-snap-gene-1206.3	1393.86	860.657	0.69602	0.0528393	0.625375	120667034	120670272	2388
snap_masked-LG01-processed-gene-42.5	188.272	421.701	-1.16249	0.0529863	0.625443	4206147	4209499	3128
maker-LG08-augustus-gene-1163.38	620.572	950.167	-0.614516	0.0529874	0.625443	116359138	116363566	1730
maker-LG01-snap-gene-1439.10	10919.2	7959.79	0.45605	0.0530185	0.625443	143962613	143963626	833
maker-LG08-snap-gene-1128.31	384.006	194.8	0.982412	0.0530626	0.625443	112805191	112807048	1065
maker-LG01-snap-gene-990.5	107.273	203.883	-0.929299	0.0530682	0.625443	98990624	98993462	1278
maker-LG01-augustus-gene-76.11	478.92	301.211	0.667013	0.0530836	0.625443	7672421	7682862	6582
maker-LG03-augustus-gene-1548.38	7.36289	0	5.31778	0.0531345	0.625443	154836452	154839360	2352
maker-LG06-augustus-gene-19.93	37.0336	104.271	-1.49467	0.0531759	0.625443	1983378	1984588	831
maker-LG07-snap-gene-1171.49	325.423	177.693	0.872563	0.0531944	0.625443	117121574	117135670	4497
maker-LG05-snap-gene-438.3	5.61202	19.1299	-1.76294	0.0532316	0.625443	43846128	43847583	785
snap_masked-LG06-processed-gene-20.53	436.383	676.549	-0.633165	0.0533185	0.626008	2022271	2026159	2043
maker-LG07-augustus-gene-1228.14	176.506	82.073	1.10688	0.0533728	0.626192	122808425	122818505	2957
maker-LG03-augustus-gene-24.20	1122.48	775.151	0.534281	0.0535051	0.626624	2387667	2390405	1469
maker-LG09-augustus-gene-309.19	512.815	1399.82	-1.44876	0.0535159	0.626624	30966241	30969062	1200
maker-LG05-augustus-gene-1304.2	4.68984	19.4804	-2.065	0.0535258	0.626624	130476199	130476924	583
maker-LG01-snap-gene-1843.9	50.3299	121.218	-1.26538	0.0535897	0.626757	184352120	184353975	1019
snap_masked-LG06-processed-gene-48.81	435.943	250.544	0.799989	0.0536522	0.626757	4838070	4839422	1353
maker-LG05-augustus-gene-88.29	493.096	286.959	0.78348	0.0536534	0.626757	8807491	8812564	1534
maker-LG01-snap-gene-1720.31	301.214	484.966	-0.687774	0.0537674	0.62713	172034707	172038650	2444
maker-LG01-snap-gene-1827.29	55.7468	139.975	-1.32503	0.0538271	0.62713	182770795	182772072	927
snap_masked-LG01-processed-gene-1698.53	34.3002	0	7.53807	0.0538274	0.62713	169824233	169824913	681
maker-LG07-snap-gene-1191.70	123.601	74.4697	0.728882	0.0538404	0.62713	119116283	119119528	1758
maker-LG06-snap-gene-22.17	125.101	368.576	-1.55894	0.0538884	0.627166	2251066	2256151	2788
maker-LG01-snap-gene-2017.15	10.1265	1.38145	2.89951	0.0539632	0.627166	201731881	201733090	1116
snap_masked-LG06-processed-gene-561.6	80.6613	38.8492	1.04507	0.0540023	0.627166	56116868	56118382	1515
maker-LG07-snap-gene-968.9	373.043	683.504	-0.873776	0.0540223	0.627166	96818428	96819769	549
maker-LG08-augustus-gene-939.3	178.47	436.411	-1.29028	0.0540659	0.627166	93924542	93926582	1333
augustus_masked-LG09-processed-gene-43.13	371.405	792.773	-1.09435	0.054121	0.627166	4323390	4325538	1051
snap_masked-LG01-processed-gene-1958.19	400.629	260.353	0.623315	0.0541392	0.627166	195838464	195841952	1834
snap_masked-LG05-processed-gene-28.6	190.974	517.258	-1.43776	0.0541536	0.627166	2828377	2832510	1539
maker-LG01-snap-gene-1426.11	6.47668	0.324285	4.16878	0.0543131	0.627856	142592138	142595144	2347
maker-LG01-snap-gene-1591.16	0.343089	5.36817	-3.90535	0.0543249	0.627856	159108964	159110480	1118
maker-LG09-augustus-gene-416.21	118.163	312.127	-1.40186	0.0544089	0.627856	41646931	41649479	792
maker-LG09-augustus-gene-506.16	207.322	380.456	-0.876381	0.0544398	0.627856	50667557	50670843	983
maker-LG06-snap-gene-2.17	181.07	310.867	-0.78025	0.054448	0.627856	249603	253353	1174
augustus_masked-LG06-processed-gene-522.73	975.66	614.55	0.667621	0.0544665	0.627856	52229821	52235586	3605
maker-LG09-snap-gene-53.10	1452.14	1060.35	0.453727	0.0544866	0.627856	5328467	5336728	2012
maker-LG01-snap-gene-1897.63	184.305	116.657	0.660337	0.0545236	0.627856	189706620	189707982	754
maker-LG06-augustus-gene-241.39	142.014	247.629	-0.803401	0.0545692	0.627934	24169682	24173681	977
maker-Contig17-snap-gene-2.70	85.3776	45.0978	0.922875	0.0546529	0.627952	299955	306652	1985
maker-LG05-augustus-gene-1312.1	7.60767	0.93109	2.98134	0.0547021	0.627952	131196007	131196759	298
maker-LG08-augustus-gene-1115.5	1557.91	943.418	0.723151	0.0547758	0.627952	111553409	111556893	2815
maker-LG09-snap-gene-93.43	315.619	148.052	1.09353	0.0547762	0.627952	9373212	9374184	807
maker-LG09-augustus-gene-223.1	6.32126	32.396	-2.36469	0.0548011	0.627952	22380270	22381224	438
snap_masked-LG03-processed-gene-1543.14	544.563	189.855	1.52227	0.0548037	0.627952	154350299	154350901	423
maker-LG01-augustus-gene-1867.33	5.21868	22.943	-2.13526	0.0548949	0.628552	186718310	186720615	2063
maker-LG09-snap-gene-25.60	484.532	291.238	0.733652	0.0550073	0.629394	2496970	2504308	5668
maker-LG03-snap-gene-1562.43	876.789	491.66	0.834535	0.0552427	0.631514	156234806	156240662	3693
maker-LG06-snap-gene-213.0	414.876	606.602	-0.547158	0.0552707	0.631514	21325546	21331156	1819
maker-LG03-augustus-gene-1547.48	509.006	718.322	-0.497221	0.055398	0.632523	154753321	154757640	3061
snap_masked-LG02-processed-gene-1736.15	3.82325	32.2416	-3.06965	0.0554615	0.632801	173637535	173640761	1184
snap_masked-LG07-processed-gene-1227.17	16.475	62.9837	-1.93192	0.0555243	0.63307	122758587	122759671	990
maker-LG01-snap-gene-1954.43	60.9939	32.6371	0.90581	0.0556021	0.633288	195417695	195420266	2076
maker-Contig16-snap-gene-0.37	52.6539	91.5388	-0.798833	0.0556559	0.633288	25886	29736	1943
maker-LG01-snap-gene-1572.11	100.932	250.312	-1.31163	0.0556979	0.633288	157214194	157217504	1987
maker-LG05-augustus-gene-311.9	33.7292	99.5373	-1.56131	0.0556999	0.633288	31168095	31173818	1767
maker-LG08-snap-gene-1138.93	673.381	381.587	0.818622	0.0557875	0.633365	113785555	113797396	8384
maker-LG01-augustus-gene-1581.41	824.52	341.871	1.27126	0.055792	0.633365	158109784	158111719	1539
maker-LG02-snap-gene-1846.48	271.996	146.568	0.893342	0.0558241	0.633365	184742692	184746227	1544
snap_masked-LG01-processed-gene-1494.8	163.454	98.0366	0.739574	0.0559302	0.634124	149398406	149399077	672
snap_masked-LG01-processed-gene-1672.13	526.55	964.713	-0.874002	0.0560333	0.634848	167270917	167273714	1581
maker-LG06-augustus-gene-1112.19	21.692	1.78926	3.62232	0.0561432	0.635647	111260587	111261872	943
maker-LG06-augustus-gene-374.0	1779.65	4330.79	-1.28294	0.0562763	0.636709	37468879	37472227	2720
snap_masked-LG05-processed-gene-1337.10	280.645	116.235	1.27092	0.0563397	0.636981	133741228	133747837	3284
maker-LG05-augustus-gene-261.28	384.906	580.038	-0.591194	0.0564299	0.637555	26131955	26136695	1220
maker-LG09-augustus-gene-83.43	0	4.13295	-4.50501	0.0565563	1	8357222	8358783	825
maker-LG01-snap-gene-1730.40	242.701	370.716	-0.611568	0.0565759	0.638759	173017386	173020349	1029
maker-LG06-snap-gene-22.18	0.686179	7.23035	-3.41867	0.056696	0.639669	2284974	2287223	639
maker-LG01-snap-gene-440.0	44.3813	12.924	1.78915	0.0567599	0.639813	44041780	44043927	1690
maker-LG01-snap-gene-1945.10	211.036	314.716	-0.576255	0.0567879	0.639813	194491336	194496940	2173
maker-LG07-augustus-gene-1216.62	1619.58	2351.4	-0.537896	0.0569211	0.640868	121642479	121649246	2032
maker-LG07-snap-gene-1156.29	390.553	254.268	0.619378	0.057037	0.641544	115656076	115658114	1158
snap_masked-LG06-processed-gene-19.31	2771.13	4020.11	-0.536612	0.0571924	0.641544	1963019	1966607	1155
snap_masked-LG08-processed-gene-1028.17	0.336774	8.06952	-4.4946	0.0572191	0.641544	102783259	102786084	1860
maker-LG01-augustus-gene-125.9	243.476	149.149	0.710788	0.0572715	0.641544	12532347	12535567	1030
snap_masked-LG02-processed-gene-1837.54	848.658	1220.22	-0.523619	0.0572844	0.641544	183743787	183746573	1188
maker-LG01-snap-gene-1663.13	65.6123	111.013	-0.758094	0.0573296	0.641544	166333081	166334164	821
maker-LG02-augustus-gene-1815.56	182.099	317.616	-0.802343	0.0573588	0.641544	181487019	181487786	550
maker-LG03-snap-gene-1577.7	609.818	240.879	1.34173	0.0573835	0.641544	157774514	157785589	2295
maker-LG01-snap-gene-1810.5	318.491	511.216	-0.681646	0.0573965	0.641544	181025604	181028536	1516
maker-LG07-snap-gene-956.8	798.815	553.412	0.529409	0.0574555	0.641544	95582682	95590062	2397
maker-LG01-augustus-gene-1755.71	397.48	255.021	0.642179	0.057493	0.641544	175551636	175564586	2666
maker-LG03-snap-gene-1562.44	14.2696	2.79366	2.32459	0.057502	0.641544	156242833	156245032	998
maker-LG01-snap-gene-1604.8	1347.82	870.639	0.630684	0.0575732	0.641544	160421602	160426498	2201
augustus_masked-LG06-processed-gene-993.20	11.055	30.1791	-1.44763	0.0575736	0.641544	99369818	99370060	243
snap_masked-LG07-processed-gene-1188.40	950.268	2034.39	-1.09799	0.0575836	0.641544	118819847	118823095	2325
maker-LG01-augustus-gene-1440.22	64.7229	24.3878	1.40857	0.0576156	0.641544	144054999	144063130	2153
maker-LG08-augustus-gene-1031.33	27.4422	85.1205	-1.63688	0.0577308	0.642014	103160068	103164313	2150
maker-LG01-snap-gene-1756.49	75.834	338.457	-2.15766	0.0577604	0.642014	175614874	175617298	1666
maker-LG08-augustus-gene-1021.40	165.937	279.453	-0.750435	0.057846	0.642014	102086098	102090545	3646
maker-Contig4-snap-gene-0.0	697.822	388.096	0.845811	0.0578526	0.642014	70284	72670	1502
maker-LG07-snap-gene-42.15	709.157	404.722	0.809886	0.0579723	0.642014	4272999	4283852	2880
maker-LG03-snap-gene-1557.2	133.087	219.804	-0.725241	0.0580171	0.642014	155779324	155785068	2445
maker-LG05-snap-gene-1368.26	7.76913	42.8933	-2.46796	0.0580234	0.642014	136824649	136827468	1609
maker-LG01-snap-gene-1763.0	31.0999	163.676	-2.39785	0.0580336	0.642014	176319194	176322587	3033
maker-LG01-snap-gene-1954.37	0.656797	6.46748	-3.28106	0.058046	0.642014	195461686	195466653	3584
augustus_masked-LG03-processed-gene-78.15	516.618	984.339	-0.930038	0.0580554	0.642014	7788031	7790851	1743
augustus_masked-LG01-processed-gene-1803.69	216.716	107.351	1.01302	0.0581023	0.642014	180369153	180369839	687
maker-LG08-augustus-gene-1149.24	1132.34	2441.5	-1.1085	0.058134	0.642014	114904515	114907915	2216
maker-LG05-snap-gene-261.47	1187.71	1715.83	-0.53052	0.058374	0.643947	26137543	26138689	649
snap_masked-Contig29-processed-gene-1.53	32.5727	58.2098	-0.840042	0.0583886	0.643947	155763	157128	1094
maker-LG03-augustus-gene-1386.5	226.085	341.778	-0.597202	0.0584727	0.644435	138681583	138683916	1768
maker-Contig8-snap-gene-3.12	301.184	186.899	0.688064	0.0585549	0.644901	295516	297199	1284
maker-LG01-snap-gene-1826.1	518.267	841.912	-0.700112	0.0586899	0.645948	182642444	182646092	1496
augustus_masked-LG08-processed-gene-1145.41	76.7317	137.595	-0.842799	0.0588962	0.647644	114567221	114567559	339
maker-LG01-snap-gene-2019.56	124.45	242.103	-0.962064	0.058924	0.647644	201954355	201958369	2793
maker-LG01-snap-gene-1821.15	1027.73	755.347	0.444175	0.0590114	0.648164	182105720	182109367	2354
maker-LG06-augustus-gene-82.3	13.076	34.435	-1.39745	0.0592228	0.649777	8216429	8217934	541
maker-LG07-snap-gene-1212.6	477.554	660.023	-0.467057	0.0592386	0.649777	121251658	121257546	2271
maker-LG08-augustus-gene-1031.36	278.127	147.485	0.916988	0.0592959	0.649965	103170091	103171603	1142
augustus_masked-LG05-processed-gene-159.4	76.4988	29.4213	1.36887	0.059396	0.650276	15925479	15932225	4382
maker-LG01-augustus-gene-1793.51	57.1805	22.7292	1.34275	0.0594955	0.650276	179294938	179295611	570
snap_masked-LG08-processed-gene-154.1	125.569	331.521	-1.39934	0.0594968	0.650276	15390749	15392437	1283
maker-LG03-augustus-gene-99.5	31.2367	95.4027	-1.60842	0.0594984	0.650276	9934261	9936228	1751
augustus_masked-LG06-processed-gene-309.30	304.323	453.568	-0.575036	0.0595253	0.650276	30918127	30919230	1104
augustus_masked-LG09-processed-gene-296.10	291.597	634.053	-1.12066	0.059696	0.651629	29610781	29611119	339
maker-LG01-snap-gene-2039.8	1231.99	801.624	0.6206	0.0597577	0.651629	203901949	203907776	2104
maker-LG05-snap-gene-939.0	217.878	326.179	-0.581892	0.0597699	0.651629	93912123	93916509	1800
maker-LG06-augustus-gene-95.29	7.51007	0.408202	4.38305	0.0598232	0.651771	9582872	9583705	663
maker-LG03-snap-gene-53.15	288.711	1939.8	-2.74825	0.0599226	0.652031	5335930	5341345	3489
snap_masked-LG01-processed-gene-2039.34	228.03	109.737	1.0583	0.05993	0.652031	203981058	203982348	558
maker-LG01-snap-gene-2019.49	184.35	312.074	-0.757848	0.0599776	0.652031	201980341	201983079	1429
maker-LG03-augustus-gene-955.8	2130.8	1448.82	0.556072	0.0600083	0.652031	95542122	95544034	1141
maker-LG01-augustus-gene-127.12	2440.62	3559.21	-0.54432	0.0601281	0.652894	12697048	12701787	2873
maker-LG01-snap-gene-1753.23	156.616	84.6404	0.886463	0.060248	0.653757	175305799	175309002	2964
snap_masked-LG09-processed-gene-94.25	428.561	280.509	0.610873	0.0603167	0.654065	9450437	9455082	2572
maker-LG09-augustus-gene-32.81	182.494	1267.16	-2.79559	0.0603766	0.654263	3224451	3226356	1369
snap_masked-LG06-processed-gene-204.13	333.805	766.901	-1.20021	0.0604159	0.654263	20401777	20407150	2161
maker-LG01-snap-gene-1846.51	9.11745	0.972854	3.21098	0.0604815	0.654535	184625641	184626784	1020
maker-LG03-augustus-gene-1471.16	376.942	227.38	0.731314	0.0607779	0.657303	147179375	147181067	1292
maker-LG01-snap-gene-1819.41	139.205	258.263	-0.892048	0.0608471	0.657612	181967862	181969015	750
augustus_masked-LG06-processed-gene-759.5	616.331	304.689	1.01751	0.0609154	0.657911	75907835	75909286	1452
augustus_masked-LG05-processed-gene-1240.7	2518.69	6765.69	-1.42551	0.0610634	0.658461	124003844	124009954	2774
maker-LG08-augustus-gene-489.2	677.218	925.248	-0.450357	0.0611032	0.658461	48943720	48946577	769
maker-LG05-snap-gene-1301.1	32.2935	79.3125	-1.29465	0.0611043	0.658461	130111869	130115157	2200
maker-LG06-snap-gene-31.44	214.986	122.98	0.809828	0.0611429	0.658461	3110598	3118543	5922
maker-LG03-augustus-gene-1581.72	2931.96	1986.08	0.56205	0.0611757	0.658461	158111088	158117318	3816
maker-LG01-snap-gene-1964.16	189.514	349.105	-0.880156	0.0612247	0.658461	196414099	196416108	1530
maker-LG08-augustus-gene-964.0	565.527	401.231	0.495763	0.0612512	0.658461	96397540	96409008	5081
maker-LG01-snap-gene-1946.0	9.17621	1.66358	2.46584	0.0613225	0.658545	194610375	194614327	2847
maker-LG06-augustus-gene-273.25	145.084	87.1333	0.734846	0.0613404	0.658545	27358801	27363454	3281
snap_masked-LG01-processed-gene-319.0	159.837	96.2322	0.730548	0.0614602	0.658827	31898260	31898844	585
maker-LG09-augustus-gene-41.17	333.439	121.656	1.45262	0.061507	0.658827	4099363	4102940	1721
maker-LG01-augustus-gene-1865.29	47.7904	122.431	-1.35678	0.0615195	0.658827	186573404	186577104	1514
maker-LG06-snap-gene-280.12	331.042	484.228	-0.549489	0.0615474	0.658827	28018378	28023092	3727
maker-LG01-augustus-gene-2039.68	340.216	601.156	-0.821518	0.0615703	0.658827	203974467	203978314	2207
snap_masked-LG01-processed-gene-1998.15	2.99334	12.861	-2.10539	0.0616573	0.658972	199812333	199813733	1401
maker-LG02-snap-gene-369.0	1.35973	9.10469	-2.75027	0.0616653	0.658972	36900062	36902553	1837
maker-LG01-snap-gene-177.25	1763.74	3461.51	-0.972635	0.0617468	0.659407	17747503	17750150	1824
maker-LG03-snap-gene-1552.70	290.008	511.516	-0.819535	0.0618019	0.65956	155275220	155280645	1552
augustus_masked-LG06-processed-gene-57.28	113.72	64.3338	0.821201	0.0619451	0.659645	5767807	5768508	702
maker-LG01-snap-gene-1878.20	169.084	374.981	-1.14841	0.0620356	0.659645	187835202	187837868	1701
augustus_masked-LG06-processed-gene-46.10	5.36339	17.1173	-1.68139	0.0620441	0.659645	4610764	4611153	390
maker-LG08-snap-gene-1115.25	5.31094	18.7298	-1.83105	0.0620467	0.659645	111566532	111573904	1491
maker-LG01-snap-gene-14.4	361.483	117.367	1.6263	0.0620491	0.659645	1478937	1481662	1866
snap_masked-LG02-processed-gene-1840.81	70.7091	39.5535	0.838345	0.0620751	0.659645	184005644	184007413	1770
snap_masked-LG01-processed-gene-1935.42	12.9414	2.48037	2.41646	0.062114	0.659645	193583836	193584615	780
maker-LG01-augustus-gene-1664.25	388.998	587.367	-0.594983	0.0621361	0.659645	166477524	166482112	1395
maker-LG07-snap-gene-1168.11	391.191	798.724	-1.03016	0.0622229	0.659798	116830764	116836004	2394
maker-LG02-snap-gene-1768.15	759.18	555.121	0.452173	0.062232	0.659798	176780485	176785783	2880
augustus_masked-LG09-processed-gene-603.8	2945.39	41.1329	6.16258	0.0622763	0.659835	60350238	60350636	399
snap_masked-LG07-processed-gene-304.5	31.6095	11.9717	1.40451	0.0625075	0.661851	30431719	30431955	237
maker-LG07-snap-gene-122.3	4.40552	0	4.57506	0.0625131	1	12191090	12195000	3456
snap_masked-LG01-processed-gene-1721.2	200.316	352.666	-0.815367	0.0626673	0.662525	172087715	172090292	1158
maker-LG05-augustus-gene-1092.5	14.3466	3.62067	2.02654	0.0627428	0.662525	109257299	109258332	521
snap_masked-LG03-processed-gene-1422.0	419.631	241.079	0.801295	0.0627638	0.662525	142182711	142188101	3327
maker-LG06-augustus-gene-1248.2	286.685	441.653	-0.624367	0.0627643	0.662525	124842463	124847989	3758
snap_masked-LG01-processed-gene-1859.44	1347.97	907.369	0.571462	0.062794	0.662525	185960688	185962247	1082
maker-LG01-snap-gene-1676.0	41.7688	72.3129	-0.792434	0.0628254	0.662525	167559188	167562521	2928
maker-LG06-snap-gene-1209.13	386.833	254.136	0.604593	0.0628578	0.662525	120951613	120953795	1743
maker-LG08-snap-gene-1126.23	677.891	384.019	0.818425	0.0629507	0.663073	112617854	112626038	6483
snap_masked-LG01-processed-gene-2010.51	27.9229	10.6521	1.37243	0.0629945	0.663102	201020761	201021384	624
maker-LG03-snap-gene-1533.14	77.6086	226.777	-1.54656	0.0631334	0.664132	153343334	153349240	2252
snap_masked-LG06-processed-gene-1318.8	670.799	1171.6	-0.805028	0.0631809	0.6642	131881032	131882928	1445
snap_masked-LG07-processed-gene-1204.16	351.818	230.31	0.610724	0.0634129	0.666037	120407091	120418038	3536
maker-LG06-snap-gene-38.14	65.8452	154.641	-1.23263	0.063478	0.666037	3807499	3810708	2935
maker-LG08-augustus-gene-1009.34	3306	2061	0.681625	0.0635168	0.666037	100916852	100918621	1266
snap_masked-Contig2-processed-gene-2.13	156.756	92.5151	0.757286	0.0635203	0.666037	254605	256389	1785
maker-LG01-snap-gene-1874.14	760.895	528.354	0.526289	0.0636994	0.667065	187447439	187451611	3405
maker-LG03-snap-gene-1559.35	124.219	56.8666	1.13284	0.0637485	0.667065	155946261	155949352	2696
maker-LG06-snap-gene-57.5	2738.4	2015.68	0.442273	0.0637671	0.667065	5774225	5777174	1053
snap_masked-LG02-processed-gene-1406.0	14.3517	71.9556	-2.32737	0.0637833	0.667065	140662664	140665877	2651
maker-LG06-augustus-gene-421.16	59.0563	127.532	-1.11008	0.063861	0.667447	42088241	42090518	1365
snap_masked-LG07-processed-gene-1184.31	1194.21	681.027	0.809517	0.0640866	0.668512	118434734	118438088	1962
augustus_masked-LG06-processed-gene-104.60	13.1262	41.9456	-1.67316	0.0641274	0.668512	10417536	10417688	153
maker-LG05-snap-gene-139.52	2325.19	1446.88	0.684182	0.0641626	0.668512	13983761	13987039	2650
maker-LG06-snap-gene-1272.0	336.601	844.565	-1.32775	0.0641877	0.668512	127188028	127192467	2032
maker-LG07-snap-gene-514.1	1101.5	581.223	0.923319	0.0641954	0.668512	51456186	51458164	1424
maker-LG09-augustus-gene-260.7	2977.95	2158.46	0.464213	0.0642109	0.668512	26030688	26033847	2505
snap_masked-LG01-processed-gene-1920.34	6.38195	0.324285	4.14899	0.0644283	0.669726	192087716	192088150	435
maker-LG06-snap-gene-1312.31	166.725	90.8095	0.876363	0.0645276	0.669726	131260918	131266427	1530
snap_masked-Contig14-processed-gene-0.50	213.744	105.868	1.01689	0.0645488	0.669726	55158	57691	1617
maker-LG05-augustus-gene-83.16	80.2253	22.2401	1.86231	0.0645743	0.669726	8291822	8293064	882
maker-LG01-augustus-gene-1839.53	167.77	398.234	-1.2462	0.0645817	0.669726	183949023	183950974	1103
snap_masked-LG01-processed-gene-1621.5	0	27.3496	-7.22528	0.064621	0.669726	162113439	162114383	945
augustus_masked-LG01-processed-gene-1793.1	234.022	130.762	0.843306	0.0646355	0.669726	179291424	179293845	1211
augustus_masked-LG01-processed-gene-1634.3	96.7871	168.29	-0.800791	0.0646586	0.669726	163395308	163398043	2736
snap_masked-LG01-processed-gene-1707.51	317.138	206.898	0.61507	0.0647253	0.669988	170761641	170762508	222
maker-LG06-augustus-gene-62.34	250.611	433.464	-0.790891	0.0648329	0.670388	6195373	6197126	611
maker-LG05-snap-gene-152.48	1047.11	1623.46	-0.632794	0.0648692	0.670388	15243916	15246270	509
maker-LG08-augustus-gene-1165.18	175.391	275.346	-0.650038	0.0649202	0.670388	116493302	116495320	1188
augustus_masked-LG06-processed-gene-1340.4	1.01032	8.74781	-3.12965	0.0649629	0.670388	134023136	134023711	576
maker-LG02-snap-gene-1290.6	4943.87	2938.44	0.75072	0.0650071	0.670388	129011871	129013495	996
maker-LG09-snap-gene-121.59	152.495	241.631	-0.664893	0.065039	0.670388	12145178	12150245	1619
augustus_masked-LG02-processed-gene-287.5	79.8411	148.405	-0.892562	0.0651421	0.670388	28786478	28787581	1104
maker-Contig5-augustus-gene-5.2	123.992	80.6129	0.621429	0.0652043	0.670388	573171	601872	5002
maker-LG06-augustus-gene-322.27	58.947	186.465	-1.66217	0.0652485	0.670388	32199207	32203017	2413
maker-LG08-augustus-gene-1093.15	176.346	290.868	-0.722568	0.0652844	0.670388	109378012	109381963	1390
maker-LG01-snap-gene-1869.29	215.133	96.8844	1.1501	0.0653501	0.670388	186966087	186968880	1885
snap_masked-LG06-processed-gene-396.61	374.289	582.063	-0.637882	0.0653865	0.670388	39635919	39642315	2986
maker-LG06-augustus-gene-110.34	0.650481	7.03147	-3.43705	0.0654349	0.670388	11010153	11012681	1171
maker-LG01-snap-gene-795.4	1087.47	647.463	0.748964	0.0654592	0.670388	79575835	79580926	3471
snap_masked-LG06-processed-gene-42.0	40.0947	119.872	-1.58167	0.0654742	0.670388	4188144	4193902	2179
maker-LG06-snap-gene-244.51	7581.55	5402.45	0.488943	0.0654841	0.670388	24391381	24393462	1990
augustus_masked-LG05-processed-gene-1212.1	2.36373	12.4516	-2.40703	0.0655383	0.670388	121285284	121286417	1134
maker-LG01-snap-gene-1723.51	745.833	465.56	0.681109	0.0655412	0.670388	172345199	172347782	1881
maker-LG06-augustus-gene-154.29	21.2899	8.57003	1.32683	0.0655512	0.670388	15446407	15448287	1230
augustus_masked-LG05-processed-gene-634.14	51.4044	23.1228	1.13868	0.065679	0.671271	63470578	63472003	986
maker-LG06-snap-gene-283.25	595.976	367.935	0.697725	0.0657333	0.671401	28311801	28313302	1281
maker-LG02-augustus-gene-179.3	649.54	300.545	1.11352	0.0660736	0.673826	17987135	17988116	844
snap_masked-LG06-processed-gene-177.30	436.096	168.809	1.37015	0.0660847	0.673826	17689786	17690253	468
snap_masked-LG01-processed-gene-1634.42	23.6716	7.25012	1.69004	0.0660957	0.673826	163416883	163417524	222
maker-LG05-augustus-gene-173.23	190.593	78.3053	1.27882	0.0661524	0.67398	17316987	17320203	2226
maker-LG01-augustus-gene-1537.10	771.205	1455.93	-0.916796	0.0662273	0.674118	153755437	153760393	2727
augustus_masked-LG06-processed-gene-38.33	776.996	1106.1	-0.509761	0.0663517	0.674118	3863156	3874619	5269
snap_masked-LG01-processed-gene-840.0	158.539	60.2398	1.40339	0.0663868	0.674118	84009557	84009748	192
maker-LG06-snap-gene-2.23	16.2064	51.9324	-1.68162	0.0663869	0.674118	264393	266692	1963
maker-LG01-snap-gene-625.12	11.624	28.9435	-1.31473	0.0664123	0.674118	62566511	62568774	1293
snap_masked-LG01-processed-gene-1856.58	59.6322	22.7906	1.378	0.066454	0.674118	185599464	185603098	1804
maker-LG06-snap-gene-226.22	545.302	1167.47	-1.09837	0.0665327	0.674118	22669373	22672731	1507
snap_masked-LG01-processed-gene-1524.6	7.62634	0.816405	3.35816	0.0665329	0.674118	152395322	152396239	918
maker-LG08-snap-gene-1093.3	419.111	940.168	-1.16515	0.0665636	0.674118	109335100	109343639	3628
maker-LG01-snap-gene-1815.22	2477.67	1559.6	0.667706	0.0666015	0.674118	181510312	181528311	10976
maker-LG01-snap-gene-841.2	3739.36	1339.29	1.48166	0.0666392	0.674118	84179655	84180854	895
augustus_masked-LG08-processed-gene-1135.77	215.234	128.853	0.738352	0.0666759	0.674118	113523112	113525088	1977
maker-Contig2-snap-gene-3.42	368.057	227.719	0.69015	0.0667077	0.674118	349542	352410	2781
snap_masked-LG03-processed-gene-112.12	72.9811	155.909	-1.09558	0.0668451	0.675086	11210614	11211064	451
maker-LG01-snap-gene-1739.71	75.8237	162.089	-1.09745	0.0669666	0.675891	173953039	173954007	758
snap_masked-LG06-processed-gene-524.80	10.6367	1.78926	2.6073	0.0671326	0.676165	52447092	52450402	1850
maker-LG03-augustus-gene-23.36	302.472	176.009	0.783566	0.0671467	0.676165	2343970	2347933	2607
maker-LG07-snap-gene-1182.28	38.9316	84.159	-1.10813	0.0671648	0.676165	118255465	118256784	1004
maker-LG06-augustus-gene-42.75	4.03936	0	4.4503	0.0672071	1	4234835	4235634	719
maker-LG07-snap-gene-1196.30	690.597	448.233	0.624445	0.0672478	0.676165	119608785	119611150	1627
maker-LG06-snap-gene-1067.13	342.724	481.232	-0.489668	0.0672884	0.676165	106706394	106710130	2204
maker-LG01-augustus-gene-1726.27	8.77726	0.816405	3.54648	0.0673297	0.676165	172654213	172654912	593
snap_masked-LG06-processed-gene-1275.15	30.3811	59.3079	-0.964946	0.0673638	0.676165	127540146	127542734	1852
maker-LG01-snap-gene-877.2	17.1255	3.00248	2.50958	0.0674215	0.676165	87756066	87760821	1620
maker-LG06-augustus-gene-310.16	864.374	1899.61	-1.13603	0.0675074	0.676165	30992262	30995920	1633
augustus_masked-LG03-processed-gene-1558.102	2.7005	14.7318	-2.4543	0.0675577	0.676165	155838877	155839812	936
snap_masked-LG03-processed-gene-1531.40	0.686179	6.76938	-3.3316	0.0676142	0.676165	153163617	153167760	2275
maker-LG06-snap-gene-106.33	695.237	407.671	0.769578	0.0676384	0.676165	10621362	10641027	8800
snap_masked-LG07-processed-gene-1225.72	118.374	40.1028	1.567	0.0676656	0.676165	122491002	122491355	354
maker-LG01-snap-gene-32.21	40.1284	122.249	-1.60711	0.0676705	0.676165	3226381	3227374	303
maker-LG01-augustus-gene-1838.8	1.30096	14.4675	-3.47109	0.0676745	0.676165	183872300	183874159	869
maker-LG06-augustus-gene-76.37	145.836	274.777	-0.914061	0.067685	0.676165	7598902	7601527	1692
maker-Contig17-snap-gene-0.40	20.8385	5.73499	1.8865	0.0677043	0.676165	23348	26587	3050
maker-LG01-snap-gene-1936.35	104.712	184.262	-0.817014	0.0678021	0.676656	193590800	193597602	4640
snap_masked-LG03-processed-gene-1460.44	1.6608	9.41759	-2.50308	0.0678736	0.676656	146048095	146048445	351
augustus_masked-LG01-processed-gene-1771.14	51.3867	28.8068	0.83624	0.0678789	0.676656	177088457	177094496	2815
maker-LG07-snap-gene-1213.74	51.9604	26.4726	0.978765	0.0679455	0.676903	121373448	121377274	2907
maker-LG06-snap-gene-117.2	2308.57	3449.83	-0.57938	0.0680273	0.677192	11785602	11787841	1241
maker-LG03-augustus-gene-1567.94	1365.37	778.283	0.811562	0.0680609	0.677192	156715233	156719069	2952
maker-LG05-augustus-gene-116.0	232.013	361.384	-0.639081	0.0681589	0.677192	11623357	11629973	1710
maker-LG01-snap-gene-2041.107	19.7483	57.8401	-1.54752	0.0681718	0.677192	204145563	204146547	898
maker-LG05-snap-gene-445.7	17.5181	5.09559	1.74236	0.0681838	0.677192	44504035	44505501	1020
maker-LG03-snap-gene-1579.70	143.627	47.3566	1.60713	0.0683418	0.678017	157955374	157965326	2292
maker-LG06-augustus-gene-285.32	26.5914	7.48288	1.84851	0.0683578	0.678017	28579004	28580769	1250
maker-LG09-augustus-gene-123.62	373.901	829.43	-1.15003	0.0683926	0.678017	12348689	12352213	1289
snap_masked-LG03-processed-gene-1530.34	2.71533	14.7318	-2.44862	0.068458	0.67825	153073976	153078018	1267
maker-LG03-snap-gene-1411.3	888.958	1219.96	-0.45686	0.0686475	0.678499	141175452	141181557	1838
augustus_masked-LG03-processed-gene-1579.53	422.722	254.067	0.732942	0.0687034	0.678499	157908953	157911709	2757
augustus_masked-LG03-processed-gene-771.1	31.3096	58.0131	-0.888269	0.0687094	0.678499	77173731	77174942	1212
maker-Contig21-snap-gene-1.65	4902.88	1794.65	1.45016	0.0687398	0.678499	192109	193654	1218
maker-LG03-augustus-gene-1167.0	22.765	53.705	-1.24133	0.0689154	0.678499	116730377	116731177	453
snap_masked-LG07-processed-gene-1177.15	152.855	90.3246	0.763036	0.0689368	0.678499	117717200	117717772	573
maker-LG01-snap-gene-1805.7	724.61	1196.75	-0.723805	0.0690036	0.678499	180484005	180486345	1260
augustus_masked-LG06-processed-gene-1301.9	119.392	66.9323	0.828655	0.0690233	0.678499	130168727	130169311	585
augustus_masked-LG08-processed-gene-1021.27	28.8616	121.538	-2.07445	0.0690729	0.678499	102173528	102174442	915
augustus_masked-LG05-processed-gene-465.8	19.6307	5.04388	1.98682	0.0690742	0.678499	46522558	46523754	1197
maker-LG05-augustus-gene-1285.31	380.846	257.176	0.567958	0.0690827	0.678499	128489084	128493149	1993
maker-LG07-snap-gene-1048.0	16.2036	40.5275	-1.32711	0.0691339	0.678499	104814476	104815137	544
maker-LG01-augustus-gene-1638.53	3.03316	15.0439	-2.31934	0.0691751	0.678499	163846892	163848284	924
maker-LG01-augustus-gene-1831.12	131.506	256.531	-0.964431	0.0693305	0.678499	183124807	183126874	951
maker-LG07-snap-gene-1133.13	465.746	309.868	0.587772	0.0694109	0.678499	113291082	113294328	2240
augustus_masked-LG07-processed-gene-1222.36	89.5699	49.0113	0.868905	0.0694248	0.678499	122272229	122272798	570
maker-LG08-snap-gene-874.24	315.083	189.962	0.73241	0.0694795	0.678499	87387520	87391232	2905
snap_masked-LG07-processed-gene-1177.10	1047.25	739.514	0.501564	0.0694805	0.678499	117704506	117707956	1070
maker-LG02-snap-gene-1838.59	464.859	828.253	-0.834034	0.0694882	0.678499	183845654	183848883	1682
maker-LG08-snap-gene-848.1	137.039	72.0395	0.925812	0.0694927	0.678499	84882153	84884896	1641
snap_masked-LG01-processed-gene-1455.14	21115.5	38897.3	-0.881353	0.0695988	0.678499	145523516	145527006	2280
maker-LG03-augustus-gene-1466.33	8.46575	37.9075	-2.16018	0.0696039	0.678499	146631156	146633261	1870
snap_masked-Contig34-processed-gene-0.61	414.418	271.809	0.609639	0.0696633	0.678499	136633	137230	399
maker-LG05-snap-gene-1335.32	277.748	432.478	-0.638134	0.0697518	0.678499	133503996	133505996	592
maker-LG06-snap-gene-1339.21	13.6942	1.29753	3.39115	0.0697741	0.678499	133961686	133971544	4343
maker-LG08-augustus-gene-1149.23	0	24.8864	-7.09048	0.0697937	0.678499	114982864	114984628	935
augustus_masked-LG01-processed-gene-1665.2	596.173	1803.05	-1.59666	0.0698533	0.678499	166513436	166519162	3239
maker-LG03-augustus-gene-1162.0	741.643	467.465	0.664908	0.0698916	0.678499	116196546	116202767	3604
maker-LG01-snap-gene-1810.18	219.863	115.695	0.928964	0.0699692	0.678499	181084492	181085704	924
maker-LG05-snap-gene-228.2	113.587	312.972	-1.4624	0.0699704	0.678499	22795524	22799614	1697
maker-LG07-snap-gene-1243.16	2929.86	1434.23	1.03092	0.0699815	0.678499	124401404	124404083	1907
maker-LG01-snap-gene-1477.4	223.809	107.596	1.05864	0.0700016	0.678499	147742523	147745667	2063
maker-LG01-snap-gene-1809.46	893.943	573.588	0.639657	0.0700214	0.678499	180917351	180920134	2471
maker-LG07-snap-gene-1083.0	218.343	114.601	0.925924	0.0700679	0.678499	108338302	108342107	2385
snap_masked-LG07-processed-gene-1054.14	21.2379	82.294	-1.954	0.0700876	0.678499	105406613	105407889	1277
maker-LG01-snap-gene-1722.60	465.281	1192.07	-1.35735	0.0701015	0.678499	172242230	172250631	2757
augustus_masked-LG06-processed-gene-25.22	6.58033	0.690723	3.28754	0.0701079	0.678499	2555664	2556743	1080
snap_masked-LG07-processed-gene-1233.46	1255.47	806.947	0.638191	0.0701264	0.678499	123369226	123375476	3373
snap_masked-LG06-processed-gene-1248.28	596.599	825.955	-0.469321	0.0701389	0.678499	124806370	124812810	2275
augustus_masked-LG08-processed-gene-993.15	41.554	87.7766	-1.07688	0.0702328	0.678499	99289913	99293975	1197
maker-Contig8-snap-gene-1.15	3.73197	14.954	-2.00563	0.0702671	0.678499	108462	110850	1986
maker-LG01-snap-gene-1817.46	389.626	263.446	0.562776	0.0703074	0.678499	181689790	181691537	1541
augustus_masked-LG05-processed-gene-373.6	591.113	366.023	0.691489	0.0703154	0.678499	37311320	37314810	1520
snap_masked-LG01-processed-gene-1967.47	881.153	1213.54	-0.461355	0.0703284	0.678499	196772298	196776977	3311
maker-LG01-augustus-gene-1663.9	2637.88	1814.41	0.53971	0.0705495	0.679752	166344487	166355471	6674
maker-LG08-augustus-gene-1111.2	194.563	119.106	0.708912	0.070567	0.679752	111150406	111165670	4988
maker-LG08-augustus-gene-1189.11	17.8906	41.8389	-1.2177	0.0706409	0.679752	118986278	118989034	2299
maker-LG06-augustus-gene-70.47	11.3773	2.7519	2.0055	0.0707386	0.679752	7009372	7011365	1605
maker-LG01-augustus-gene-1693.50	19.2326	5.56755	1.8096	0.0707569	0.679752	169316587	169317488	714
maker-LG01-snap-gene-1898.0	100.135	176.384	-0.816565	0.0707989	0.679752	189814701	189815209	243
maker-LG06-augustus-gene-1334.3	205.296	446.456	-1.12098	0.0708651	0.679752	133388716	133391410	1486
maker-LG05-augustus-gene-146.22	251.452	723.899	-1.52559	0.0708744	0.679752	14664708	14666427	1067
snap_masked-LG06-processed-gene-1225.25	90.9107	44.8324	1.01522	0.0708885	0.679752	122543536	122548257	2606
maker-LG06-snap-gene-392.16	91.2113	54.148	0.745292	0.0709121	0.679752	39235453	39236747	847
maker-LG01-snap-gene-82.8	416.406	273.376	0.608225	0.0709204	0.679752	8265228	8267118	1230
maker-LG01-snap-gene-1857.21	1159.55	681.144	0.768159	0.0712376	0.682388	185760352	185764580	3056
augustus_masked-LG08-processed-gene-1088.31	3462.36	5006.59	-0.531945	0.0714836	0.684118	108828712	108830517	1682
maker-LG06-snap-gene-77.17	11.7184	40.5969	-1.80027	0.0716	0.684118	7691975	7696474	834
maker-LG09-augustus-gene-121.62	337.774	505.641	-0.580931	0.0716294	0.684118	12102765	12106963	3352
maker-LG06-augustus-gene-117.19	135.696	73.0911	0.889999	0.0716594	0.684118	11700918	11705266	2212
maker-LG02-snap-gene-67.4	65.4112	26.1201	1.3368	0.0716713	0.684118	6756620	6757777	1067
maker-LG07-snap-gene-539.1	828.459	536.584	0.626721	0.0716719	0.684118	53909276	53911787	2060
maker-LG03-snap-gene-1547.25	1581.07	2288.07	-0.533439	0.071773	0.684679	154757702	154760847	1917
augustus_masked-LG06-processed-gene-85.65	8.60948	23.2423	-1.42515	0.0718783	0.68528	8576234	8577742	1509
maker-LG07-snap-gene-1232.62	4.39191	29.0193	-2.71073	0.0719218	0.685291	123244967	123246543	1137
snap_masked-LG02-processed-gene-1480.5	147.876	297.6	-1.00789	0.0720716	0.685368	148078274	148079677	1204
augustus_masked-LG05-processed-gene-1310.22	143.192	249.564	-0.80328	0.0720893	0.685368	131016456	131019856	1582
maker-LG09-augustus-gene-116.63	13.3802	1.97764	2.6963	0.0720998	0.685368	11679221	11684827	2778
maker-LG01-snap-gene-1722.58	25.5798	66.5595	-1.38206	0.0721353	0.685368	172220206	172222304	722
maker-LG08-augustus-gene-913.12	2713.14	3927.37	-0.53342	0.0721743	0.685368	91375752	91380915	2436
maker-LG01-augustus-gene-1839.56	275.494	113.664	1.28025	0.0721841	0.685368	183980800	183982596	946
maker-LG07-snap-gene-1045.3	253.803	564.177	-1.15264	0.0722936	0.686005	104576762	104578594	1194
maker-LG09-snap-gene-9.16	751.869	1185.3	-0.656483	0.0723719	0.686345	913569	917806	1542
maker-LG09-snap-gene-24.24	50750.7	28014.4	0.857276	0.0724667	0.68673	2381538	2400793	8450
maker-LG09-augustus-gene-128.13	14.9393	33.5907	-1.17003	0.0724973	0.68673	12871133	12874110	1315
maker-LG09-snap-gene-246.32	1350.7	814.787	0.728575	0.0725607	0.686928	24660863	24666626	3573
snap_masked-LG06-processed-gene-127.1	6.02964	0	5.03211	0.0726353	0.687232	12695916	12700026	2227
snap_masked-LG01-processed-gene-1595.80	182.349	468.349	-1.36031	0.0728082	0.68779	159556403	159559527	1694
maker-LG07-augustus-gene-1148.4	658.899	907.857	-0.462217	0.0728278	0.68779	114836378	114842226	3348
snap_masked-LG01-processed-gene-72.13	2438.12	1524.37	0.677593	0.0728759	0.68779	7221527	7222123	597
snap_masked-LG01-processed-gene-1985.49	65.0122	20.1434	1.68729	0.0728981	0.68779	198501353	198502933	1581
maker-LG01-snap-gene-1846.44	2.68375	18.8502	-2.80678	0.0729653	0.68779	184684177	184687162	2533
maker-LG08-snap-gene-1189.16	125.286	190.821	-0.608376	0.0729964	0.68779	118948138	118950302	1767
maker-LG03-augustus-gene-1471.17	200.992	129.18	0.634779	0.0730109	0.68779	147181931	147183537	1050
maker-LG07-augustus-gene-1125.12	259.486	406.981	-0.649976	0.0731292	0.68779	112538713	112547426	2144
maker-LG01-snap-gene-177.16	115.553	170.012	-0.557882	0.0731689	0.68779	17723341	17725617	795
maker-LG01-snap-gene-1726.45	3.60813	12.9651	-1.84861	0.0732308	0.68779	172641849	172644067	1209
snap_masked-LG02-processed-gene-378.2	1744.26	3769.91	-1.11194	0.0732795	0.68779	37835317	37836703	1149
maker-LG03-augustus-gene-1571.7	830.471	1133.4	-0.448692	0.0733171	0.68779	157117456	157122214	2078
maker-LG07-snap-gene-1230.26	0.686179	7.11644	-3.38959	0.0733289	0.68779	123050037	123051368	825
maker-LG05-snap-gene-132.12	48.4209	19.3984	1.30828	0.073329	0.68779	13261300	13263247	441
maker-LG06-snap-gene-524.25	880.089	530.643	0.729688	0.0733635	0.68779	52406115	52410547	2001
snap_masked-LG07-processed-gene-25.1	8.58422	38.2853	-2.15028	0.0733745	0.68779	2561816	2563244	1196
maker-Contig11-snap-gene-1.22	4.05611	0	4.456	0.0733926	1	85488	89416	2266
maker-LG01-snap-gene-45.21	77.0513	28.9851	1.40363	0.0735288	0.688498	4544883	4547114	1432
maker-LG01-snap-gene-1642.23	37.9971	117.2	-1.62652	0.0735544	0.688498	164249062	164253222	2108
maker-LG01-snap-gene-857.19	4.0498	0	4.45391	0.0735861	1	85763961	85765048	630
maker-LG01-augustus-gene-1957.35	4.0498	0	4.45391	0.0735861	1	195758522	195761501	813
augustus_masked-LG01-processed-gene-1691.9	181.632	355.458	-0.969137	0.0736158	0.688498	169159648	169163422	1787
maker-LG01-snap-gene-1730.44	45.5343	20.4376	1.16584	0.0736211	0.688498	173062041	173063725	968
maker-LG06-augustus-gene-344.5	6197.36	4534.97	0.45067	0.0737015	0.688498	34426270	34428087	1311
maker-Contig1-snap-gene-6.28	133.361	228.994	-0.779913	0.0737053	0.688498	703802	706957	1550
snap_masked-LG08-processed-gene-982.9	347.308	603.277	-0.795623	0.0739498	0.689951	98274836	98282383	3744
maker-LG01-snap-gene-1648.3	235.262	76.8292	1.61876	0.0739617	0.689951	164868189	164869962	1587
maker-LG01-snap-gene-1802.11	66.7232	28.5804	1.23299	0.0740599	0.689951	180205907	180206905	791
maker-LG01-snap-gene-1802.10	93.4294	51.39	0.861817	0.0740947	0.689951	180200304	180202021	971
maker-LG05-snap-gene-1160.1	470.395	320.869	0.552189	0.0741461	0.689951	116023382	116028326	1853
maker-LG01-snap-gene-1737.17	1446.86	2159.62	-0.577666	0.0741878	0.689951	173745040	173746745	718
snap_masked-LG09-processed-gene-1055.4	362.378	532.053	-0.553483	0.0742831	0.689951	105505840	105509846	1168
maker-LG01-snap-gene-1776.11	276.369	391.628	-0.502126	0.0743697	0.689951	177650312	177654379	1061
maker-LG02-snap-gene-1692.28	369.159	711.269	-0.946341	0.0744041	0.689951	169205965	169215426	3993
maker-LG06-snap-gene-1321.14	69.8319	22.6851	1.62872	0.074438	0.689951	132098905	132113791	1504
maker-LG06-augustus-gene-242.15	264.441	514.399	-0.960166	0.0744813	0.689951	24204171	24205987	1121
maker-LG08-snap-gene-1140.37	124.358	201.16	-0.692288	0.0744819	0.689951	114066512	114067553	844
augustus_masked-LG05-processed-gene-227.14	236.447	103.154	1.20029	0.0744849	0.689951	22728054	22729064	1011
maker-LG05-augustus-gene-76.0	6.46405	24.8337	-1.94391	0.0744945	0.689951	7658077	7661482	2313
maker-LG01-snap-gene-1762.44	3.50955	16.0297	-2.17865	0.0745123	0.689951	176253153	176254216	703
maker-LG07-augustus-gene-1085.1	170.297	113.136	0.592614	0.0745432	0.689951	108550622	108554936	994
maker-LG06-augustus-gene-6.47	686.415	449.474	0.610579	0.0747697	0.691651	617418	620478	2091
maker-LG01-snap-gene-1851.40	644.781	411.107	0.650456	0.0748134	0.69166	185127233	185130483	2781
maker-LG08-augustus-gene-1132.27	409.967	248.923	0.717847	0.0749372	0.692409	113266980	113271378	1716
snap_masked-LG01-processed-gene-1599.22	622.805	1220.9	-0.971187	0.0751182	0.693686	159902438	159904145	1223
snap_masked-LG06-processed-gene-495.6	11.0971	146.405	-3.72243	0.0751693	0.693762	49527184	49528220	775
maker-LG06-snap-gene-252.4	130.795	303.503	-1.21484	0.0752557	0.694163	25196252	25197056	343
snap_masked-LG01-processed-gene-703.6	97.1819	162.031	-0.739162	0.0755024	0.695529	70339245	70340717	1473
snap_masked-LG01-processed-gene-1941.19	26.264	99.9099	-1.92849	0.0755396	0.695529	194114227	194119400	3607
maker-LG08-augustus-gene-1043.8	857.12	584.036	0.55321	0.0755487	0.695529	104364537	104371369	3067
snap_masked-LG06-processed-gene-17.59	57.7487	31.0552	0.890084	0.0755817	0.695529	1738659	1742060	3402
maker-LG02-snap-gene-358.13	445.06	645.064	-0.535366	0.0756188	0.695529	35843169	35847102	996
maker-LG07-augustus-gene-1235.102	1201.48	643.511	0.90137	0.0756931	0.695817	123515383	123524093	8070
maker-LG05-snap-gene-37.91	233.032	156.506	0.575905	0.075849	0.696392	3713217	3718479	2788
maker-LG06-augustus-gene-160.6	615.965	384.377	0.679692	0.0758801	0.696392	16020794	16027306	3040
augustus_masked-LG06-processed-gene-525.20	349.252	595.281	-0.769313	0.0759197	0.696392	52487312	52491189	1721
maker-LG03-snap-gene-182.1	636.342	286.654	1.1499	0.0759277	0.696392	18210052	18214549	3541
maker-LG01-snap-gene-1770.32	129.749	250.339	-0.948615	0.0761288	0.697308	177071104	177073989	1808
maker-LG06-augustus-gene-247.13	1.01032	8.31789	-3.05117	0.0762075	0.697308	24780585	24781222	464
snap_masked-LG06-processed-gene-1289.3	97.9202	47.4885	1.04853	0.0762726	0.697308	128934457	128939737	2168
maker-LG01-augustus-gene-1685.39	1033.82	1410.03	-0.447388	0.0762786	0.697308	168488830	168492663	1984
maker-LG06-augustus-gene-279.34	367.676	588.445	-0.678511	0.0763312	0.697308	27938027	27940006	1196
maker-LG07-snap-gene-1220.24	209.102	337.939	-0.692492	0.0763573	0.697308	122085894	122087217	508
maker-LG01-snap-gene-537.0	2.36593	12.2545	-2.36943	0.0763699	0.697308	53776024	53776939	657
maker-LG06-snap-gene-50.11	16.8705	3.09778	2.49225	0.0764722	0.697308	5002458	5016021	3291
maker-LG01-snap-gene-1850.21	5.9908	16.4493	-1.45268	0.0764862	0.697308	185024878	185029032	1953
maker-LG01-snap-gene-641.6	142.23	214.782	-0.593281	0.076496	0.697308	64168479	64171893	1683
snap_masked-LG06-processed-gene-25.52	264.511	158.197	0.743805	0.0765017	0.697308	2516912	2520214	2893
snap_masked-LG07-processed-gene-959.22	14.7722	38.3827	-1.37722	0.0765581	0.697429	95939462	95941603	675
maker-LG06-snap-gene-43.32	25.3018	10.7155	1.24407	0.0766084	0.697494	4298076	4300359	1266
snap_masked-LG01-processed-gene-796.6	1014.81	1473.77	-0.538618	0.0766932	0.697874	79580773	79591909	6391
maker-LG08-snap-gene-226.11	266.327	170.056	0.644685	0.0767744	0.69822	22652903	22654684	1295
maker-LG01-snap-gene-1536.54	4.6352	0.282521	3.68872	0.0767826	1	153648236	153653769	733
snap_masked-LG08-processed-gene-939.10	934.428	490.282	0.931306	0.076865	0.698453	93912635	93924335	5986
maker-LG06-augustus-gene-21.14	175.56	314.248	-0.841702	0.0768864	0.698453	2174010	2177740	2121
maker-LG07-snap-gene-1237.84	610.433	831.948	-0.446666	0.0769641	0.698766	123745547	123751852	3262
snap_masked-LG08-processed-gene-1152.8	1049.49	769.23	0.448323	0.0770625	0.6989	115229847	115234180	1251
maker-LG08-augustus-gene-1168.70	784.815	487.575	0.68617	0.077094	0.6989	116793020	116795727	1646
maker-LG07-snap-gene-505.10	95.0192	46.287	1.03685	0.0771195	0.6989	50507901	50515773	3360
snap_masked-LG06-processed-gene-39.5	358.04	153.897	1.21969	0.0771662	0.6989	3900566	3901564	999
maker-LG01-snap-gene-1913.19	97.9363	153.156	-0.645923	0.0771948	0.6989	191336980	191338382	1209
snap_masked-LG08-processed-gene-498.15	170.792	241.295	-0.498124	0.0772607	0.699105	49867801	49872996	2906
snap_masked-LG06-processed-gene-8.61	13.0466	43.6417	-1.73641	0.0773824	0.699816	888757	889197	270
maker-LG01-augustus-gene-2034.1	3.63751	0	4.30094	0.0775894	1	203457314	203459185	1643
maker-LG05-snap-gene-94.37	96.9328	211.744	-1.12867	0.07767	0.702024	9396004	9397837	1406
snap_masked-LG09-processed-gene-928.23	4.03716	0	4.44977	0.0779939	1	92814349	92814576	228
augustus_masked-LG01-processed-gene-1992.2	512.726	304.489	0.753351	0.0780296	0.70321	199188750	199190540	1791
maker-LG07-augustus-gene-1172.68	4.95934	21.923	-2.13842	0.0780304	0.70321	117268017	117270116	1670
maker-LG07-snap-gene-848.18	91.2952	42.7254	1.09723	0.0780949	0.70321	84816920	84822583	3539
maker-LG01-snap-gene-2038.49	11.2347	1.95709	2.59409	0.0781259	0.70321	203865693	203866961	825
maker-LG01-snap-gene-1812.54	116.706	211.65	-0.8588	0.0781314	0.70321	181241674	181244482	1413
augustus_masked-LG05-processed-gene-1190.3	43.2819	140.174	-1.69534	0.0781776	0.70321	119065821	119066927	1107
maker-LG01-augustus-gene-1822.30	83.3448	222.323	-1.41399	0.0782361	0.70321	182264466	182267973	1896
maker-LG09-snap-gene-46.20	16.4077	46.2714	-1.49497	0.0782402	0.70321	4625650	4629353	2076
maker-LG03-augustus-gene-14.8	1760.22	2893.32	-0.717028	0.078265	0.70321	1468147	1468954	506
maker-LG01-snap-gene-1758.59	112.959	69.3862	0.70708	0.0782728	0.70321	175829638	175831405	1517
maker-LG03-augustus-gene-102.24	516.529	262.443	0.978182	0.0782894	0.70321	10195778	10198866	2144
maker-LG08-snap-gene-1031.29	455.848	705.925	-0.631512	0.0783227	0.70321	103120899	103126083	2485
snap_masked-LG03-processed-gene-41.23	478.407	310.11	0.623582	0.078391	0.703369	4153201	4158232	1692
snap_masked-LG01-processed-gene-2031.23	0.679863	5.44148	-3.01586	0.0784562	0.703369	203103366	203103881	326
maker-LG06-augustus-gene-1125.29	76.7674	133.212	-0.799126	0.0785311	0.703369	112499611	112501304	1084
snap_masked-LG01-processed-gene-1967.58	426.363	1066.78	-1.32319	0.078532	0.703369	196765679	196771903	2855
maker-LG02-augustus-gene-1833.2	1033.73	1512.92	-0.549134	0.0785578	0.703369	183335726	183338411	1737
snap_masked-LG01-processed-gene-1932.58	151.757	301.913	-0.993254	0.0786444	0.703713	193228086	193235140	4892
snap_masked-LG01-processed-gene-1894.9	2.61456	11.5312	-2.14727	0.0786832	0.703713	189462484	189463074	591
maker-LG05-augustus-gene-685.8	243.181	349.009	-0.521877	0.0789099	0.70535	68572491	68581715	3515
maker-LG03-augustus-gene-1191.0	377.568	554.583	-0.554611	0.0789935	0.705707	119091455	119102020	4616
maker-LG06-augustus-gene-31.37	0	5.76459	-4.97963	0.0790606	0.705917	3168880	3170460	1075
maker-LG06-augustus-gene-84.7	295.271	496.074	-0.749	0.0791088	0.705957	8427521	8430970	2594
maker-LG01-augustus-gene-1676.22	153.724	87.7618	0.807105	0.0793918	0.707744	167572779	167576443	1431
maker-LG06-augustus-gene-89.10	118.066	177.55	-0.588746	0.0793965	0.707744	8899409	8900497	755
snap_masked-LG01-processed-gene-1814.56	139.693	87.9352	0.666213	0.0795601	0.708539	181480112	181482302	1954
maker-LG01-snap-gene-1791.59	1878.37	929.896	1.01473	0.0795733	0.708539	179122579	179123475	796
snap_masked-LG01-processed-gene-1821.38	13889.7	7943.78	0.806203	0.0797219	0.709472	182176274	182177668	1227
snap_masked-LG02-processed-gene-1840.65	218.476	147.497	0.568153	0.0798345	0.709986	183997460	184000854	2353
maker-LG07-snap-gene-963.8	773.908	1361.56	-0.815045	0.0798674	0.709986	96371207	96374786	1221
maker-Contig25-augustus-gene-1.14	3.77398	22.7984	-2.6032	0.0799284	0.710138	139461	140448	330
maker-LG06-augustus-gene-119.44	463.282	648.577	-0.484969	0.0801243	0.711111	11985372	11988196	1563
augustus_masked-LG01-processed-gene-1906.8	318.321	200.959	0.663859	0.0801279	0.711111	190668436	190670860	1162
maker-LG01-snap-gene-1980.26	87.4282	138.661	-0.66375	0.0801929	0.711111	198042119	198042722	273
maker-LG01-augustus-gene-1628.28	174.524	106.45	0.717528	0.0802442	0.711111	162813783	162819319	4117
maker-LG09-snap-gene-20.12	129.992	205.696	-0.66427	0.080353	0.711111	2019728	2022207	2277
maker-LG01-snap-gene-1749.50	240.995	370.026	-0.617621	0.0804923	0.711111	174946249	174948085	750
snap_masked-LG06-processed-gene-558.6	130.617	83.3834	0.645878	0.0804973	0.711111	55786586	55789709	646
snap_masked-LG01-processed-gene-1835.44	162.596	291.064	-0.840149	0.0805583	0.711111	183496947	183497882	789
maker-LG08-snap-gene-1128.37	100.914	41.0654	1.30341	0.0806132	0.711111	112885944	112887473	1404
snap_masked-LG06-processed-gene-54.56	2191.54	3407.19	-0.636488	0.0806185	0.711111	5393732	5394941	563
maker-LG01-snap-gene-1862.19	48.1192	19.4315	1.295	0.0806345	0.711111	186279011	186280390	945
maker-LG01-snap-gene-1235.2	17.3261	6.34141	1.47523	0.0806425	0.711111	123526784	123528030	1156
maker-LG01-snap-gene-1749.51	583.518	908.858	-0.639092	0.0806498	0.711111	174964349	174966853	889
maker-LG03-snap-gene-1462.48	480.046	295.182	0.700491	0.0806533	0.711111	146252853	146257166	3079
maker-LG07-augustus-gene-142.9	131.838	196.77	-0.577952	0.0807141	0.71126	14230243	14232680	1565
maker-LG02-snap-gene-1773.20	356.067	511.097	-0.521406	0.0807837	0.711467	177382923	177388680	1785
maker-LG01-snap-gene-1878.23	291.041	173.677	0.743868	0.0808255	0.711467	187860801	187864981	3396
maker-LG01-augustus-gene-1718.7	270.057	604.582	-1.16164	0.0808808	0.711566	171885486	171887225	930
maker-LG09-augustus-gene-61.30	279.071	657.72	-1.23631	0.0810411	0.712589	6168952	6171909	1375
maker-LG08-augustus-gene-637.1	335.771	136.801	1.2976	0.0811551	0.71272	63787290	63789522	1692
maker-LG05-augustus-gene-1360.3	105.983	157.893	-0.576202	0.0811736	0.71272	136019411	136022924	2168
augustus_masked-LG01-processed-gene-1702.51	1224.81	2346.13	-0.937565	0.081238	0.71272	170243906	170244727	822
maker-LG01-snap-gene-1881.29	147.364	79.4443	0.89116	0.0812404	0.71272	188177236	188180712	2889
snap_masked-LG06-processed-gene-1308.18	74.7006	124.51	-0.738289	0.0812763	0.71272	130853308	130856002	1216
maker-LG06-augustus-gene-17.0	10.753	2.19785	2.3422	0.0814123	0.713334	1728409	1734310	1906
maker-LG01-snap-gene-1792.60	585.028	1114.79	-0.930326	0.0814345	0.713334	179227238	179235090	3229
augustus_masked-LG03-processed-gene-1574.76	74.8815	36.5831	1.04204	0.0815887	0.713889	157454743	157455981	1239
maker-LG08-augustus-gene-1168.72	205.618	129.45	0.665917	0.0816083	0.713889	116825660	116828176	1443
snap_masked-LG01-processed-gene-1822.37	1333.54	2566.01	-0.944433	0.0816489	0.713889	182204288	182215999	5178
maker-LG07-augustus-gene-1046.9	360.273	484.632	-0.427314	0.0817029	0.713889	104652720	104656319	1341
maker-LG01-snap-gene-2043.7	14.1824	1.50713	3.28058	0.0817184	0.713889	204336162	204342827	1358
snap_masked-LG01-processed-gene-1552.1	452.028	685.156	-0.600872	0.0818145	0.714343	155231973	155236084	3251
maker-LG06-snap-gene-175.30	8.10179	43.636	-2.43408	0.0818705	0.714446	17555407	17559930	3088
augustus_masked-LG01-processed-gene-1888.0	60.4669	109.435	-0.85151	0.0819448	0.714446	188781943	188786452	2518
maker-LG02-snap-gene-26.11	50.3115	118.588	-1.23601	0.0819588	0.714446	2652322	2654597	1676
maker-LG01-augustus-gene-1867.32	207.529	346.639	-0.740672	0.0820867	0.714481	186711476	186716750	1166
maker-Contig27-snap-gene-0.1	6.60779	24.7299	-1.89343	0.0820881	0.714481	42081	44684	1588
maker-LG09-snap-gene-197.15	45.8796	25.5624	0.845013	0.0820953	0.714481	19741239	19747676	2889
maker-LG08-augustus-gene-1005.7	318.063	185.72	0.775119	0.0821434	0.714515	100568477	100570592	839
maker-LG01-augustus-gene-1921.37	271.807	381.007	-0.487882	0.0822316	0.714898	192146698	192156726	4221
maker-Contig13-augustus-gene-3.38	337.871	478.727	-0.502013	0.0825558	0.716651	398567	401413	1184
snap_masked-LG03-processed-gene-1558.10	26.3304	9.51289	1.48841	0.0825591	0.716651	155840784	155842462	363
maker-LG08-snap-gene-1186.55	28.511	8.1736	1.81884	0.0825662	0.716651	118651555	118654542	1790
maker-LG01-snap-gene-1841.46	40.193	102.574	-1.34826	0.0827081	0.717498	184129478	184131111	1087
maker-LG06-augustus-gene-181.3	104.167	157.968	-0.600694	0.0828506	0.71835	18096935	18102435	2583
maker-LG02-snap-gene-1543.7	433.49	277.162	0.64677	0.0829772	0.718586	154286021	154289813	1813
maker-LG01-snap-gene-9.6	157.286	245.392	-0.642602	0.082981	0.718586	909569	912065	1410
maker-LG01-augustus-gene-1832.14	104.131	266.214	-1.35283	0.0830288	0.718586	183283586	183285316	1612
maker-LG02-snap-gene-286.1	745.738	485.699	0.617689	0.0831	0.718586	28680727	28683623	2812
augustus_masked-LG01-processed-gene-890.2	1026.41	1649.78	-0.684786	0.0831246	0.718586	89078764	89084409	1606
maker-LG01-snap-gene-1961.24	14.4599	213.614	-3.88352	0.08316	0.718586	196117768	196121598	1948
snap_masked-LG08-processed-gene-268.3	49.2997	94.0624	-0.932156	0.083217	0.718586	26797342	26797662	321
maker-LG01-augustus-gene-1627.14	1040.14	613.371	0.762624	0.0832332	0.718586	162721422	162725629	1423
maker-LG06-snap-gene-375.17	1428.7	2433.31	-0.768277	0.083451	0.719797	37578876	37582827	2031
snap_masked-LG06-processed-gene-175.4	1.02927	8.38242	-3.03537	0.0834625	0.719797	17503109	17504144	726
maker-LG07-snap-gene-118.1	15.0337	5.18972	1.52264	0.0835577	0.720067	11806595	11808376	878
augustus_masked-LG01-processed-gene-1994.4	9.67225	24.631	-1.35788	0.0835828	0.720067	199483859	199487223	1281
maker-LG08-augustus-gene-1147.61	306.146	171.625	0.835557	0.083704	0.720649	114771201	114775665	3931
snap_masked-LG01-processed-gene-1828.31	199.811	119.957	0.734996	0.0837614	0.720649	182828844	182829200	357
maker-LG01-snap-gene-1536.49	416.32	252.076	0.724508	0.0837839	0.720649	153601490	153603863	2092
maker-LG09-augustus-gene-70.22	273.577	614.185	-1.16593	0.0838427	0.720771	7017998	7020321	1283
maker-LG02-snap-gene-1687.21	31.921	96.5779	-1.59457	0.0838924	0.720816	168743200	168744857	1458
maker-LG09-augustus-gene-548.10	993.597	453.032	1.134	0.0841513	0.722164	54862892	54865221	1558
maker-LG09-augustus-gene-80.7	248.368	161.656	0.617241	0.0841635	0.722164	8083825	8085382	1195
maker-LG05-augustus-gene-1394.18	51.1917	88.6252	-0.793114	0.0841833	0.722164	139448737	139452279	2572
maker-LG06-augustus-gene-344.3	1681.19	2413.17	-0.521418	0.0843996	0.723636	34437057	34439102	1072
maker-LG06-augustus-gene-1333.22	12.9186	31.1747	-1.26338	0.0845305	0.724303	133337466	133339255	1215
augustus_masked-LG09-processed-gene-51.23	158.355	86.0606	0.885557	0.0846521	0.724303	5141331	5142188	858
maker-LG05-augustus-gene-238.10	315.886	466.598	-0.563376	0.084654	0.724303	23876070	23882054	1883
maker-LG06-augustus-gene-6.53	225.187	469.499	-1.06049	0.0846565	0.724303	619996	626955	6578
maker-LG05-augustus-gene-1146.12	268.03	386.786	-0.528476	0.0849559	0.726326	114652052	114655812	1301
snap_masked-LG09-processed-gene-77.55	919.094	644.347	0.51242	0.0849827	0.726326	7703624	7705387	1569
snap_masked-LG05-processed-gene-1103.2	16.5163	60.979	-1.88584	0.0850648	0.726644	110289477	110291944	1096
maker-Contig4-snap-gene-1.22	346.46	644.364	-0.89568	0.085274	0.728047	94217	102167	5064
augustus_masked-LG06-processed-gene-1122.1	1653.59	1094.19	0.596038	0.0854013	0.728431	112188413	112198409	3315
snap_masked-LG05-processed-gene-35.5	0	5.46242	-4.90696	0.0854647	0.728431	3537605	3537865	261
snap_masked-LG01-processed-gene-1732.10	256.532	430.327	-0.747219	0.0855348	0.728431	173197411	173199714	619
maker-LG06-snap-gene-882.4	582.991	1060.21	-0.862849	0.0855358	0.728431	88211631	88222913	2235
maker-LG06-augustus-gene-74.7	242.56	353.785	-0.544111	0.0856011	0.728431	7442336	7445022	1635
snap_masked-LG01-processed-gene-1843.27	7599.53	5048.05	0.59029	0.0856208	0.728431	184291592	184292872	1281
maker-LG06-augustus-gene-1168.0	625.261	401.392	0.637919	0.0856343	0.728431	116854918	116866058	4316
maker-LG01-snap-gene-583.1	75.2125	161.007	-1.09592	0.0856839	0.728471	58324844	58325924	964
maker-LG03-augustus-gene-120.7	80.1179	41.7292	0.942566	0.0857746	0.728575	12042270	12043990	1574
maker-LG01-augustus-gene-2038.32	4.20616	14.3343	-1.76975	0.0857862	0.728575	203850886	203853808	1370
snap_masked-LG01-processed-gene-102.29	641.824	973.738	-0.600962	0.0858729	0.728928	10238189	10240047	1017
snap_masked-LG09-processed-gene-259.30	0	3.68299	-4.34232	0.0860287	1	25987071	25988276	1206
maker-LG06-augustus-gene-309.3	511.514	273.533	0.901469	0.0861938	0.730503	30941262	30943712	2071
maker-LG01-snap-gene-1828.44	10.7299	1.63281	2.80688	0.0861948	0.730503	182836342	182838413	1426
maker-LG03-augustus-gene-1462.25	6.29408	16.9092	-1.42977	0.0862463	0.730503	146198459	146201361	2042
maker-LG07-snap-gene-1172.48	102.294	189.786	-0.888613	0.0862862	0.730503	117213182	117216011	1152
snap_masked-LG01-processed-gene-1614.41	943.016	1352.17	-0.519877	0.0862926	0.730503	161475048	161479313	3353
maker-LG06-augustus-gene-216.24	195.689	381.806	-0.965577	0.0863293	0.730503	21649060	21654229	2701
maker-LG09-snap-gene-32.65	3.86307	25.0019	-2.69075	0.0864109	0.730769	3259762	3263616	2850
maker-LG06-augustus-gene-257.32	170.798	364.542	-1.09321	0.0864588	0.730769	25784089	25787007	1845
snap_masked-Contig2-processed-gene-1.32	250.172	733.184	-1.55082	0.0865785	0.730769	125417	128065	1698
augustus_masked-LG08-processed-gene-527.0	259.485	409.075	-0.656868	0.0865939	0.730769	52721414	52724053	1196
maker-LG06-snap-gene-48.46	307.447	203.11	0.598325	0.0866705	0.730769	4840702	4842534	1661
maker-LG01-augustus-gene-437.4	272.038	498.487	-0.874385	0.0867023	0.730769	43732675	43737458	1620
maker-LG02-augustus-gene-1826.57	399.631	643.534	-0.687654	0.0867034	0.730769	182591492	182593125	1305
snap_masked-LG01-processed-gene-1594.5	528.746	343.699	0.620194	0.0867292	0.730769	159402088	159409205	4286
maker-LG01-snap-gene-1692.50	21.7894	40.5578	-0.891624	0.0867672	0.730769	169221434	169222563	1051
augustus_masked-LG03-processed-gene-1580.20	447.642	806.648	-0.849662	0.0868339	0.73095	157998636	157999232	597
maker-Contig5-augustus-gene-4.0	186.598	115.82	0.68794	0.0870366	0.731718	387840	403432	4058
maker-LG07-snap-gene-1230.22	145.184	211.996	-0.544817	0.0870813	0.731718	123034871	123036577	517
maker-LG01-snap-gene-11.18	116.395	38.5534	1.60122	0.0871008	0.731718	1140018	1141843	1430
maker-Contig31-augustus-gene-0.44	5.25438	0	4.83186	0.0871153	0.731718	116909	120133	1910
snap_masked-LG01-processed-gene-1707.37	193.084	96.4359	1.00579	0.0871513	0.731718	170725679	170727082	1404
snap_masked-Contig5-processed-gene-2.7	5.67902	0	4.94316	0.0872465	0.731762	265707	266309	603
maker-LG01-snap-gene-83.7	975.452	2414.05	-1.30718	0.087247	0.731762	8358632	8360280	1003
snap_masked-LG03-processed-gene-1507.20	1064.52	1703.16	-0.678329	0.0872938	0.731776	150727664	150730916	2891
maker-LG01-snap-gene-1081.2	154.297	285.826	-0.889877	0.0874757	0.73292	108180859	108183946	1484
snap_masked-LG03-processed-gene-1563.1	2838.8	1926.34	0.559374	0.0876092	0.733659	156298779	156300916	1619
maker-LG08-augustus-gene-1142.28	1454.48	2309.89	-0.667373	0.0877235	0.734236	114241522	114248113	3433
snap_masked-LG07-processed-gene-1145.17	2.25472	13.7802	-2.59851	0.0879632	0.73513	114494449	114499322	2704
maker-LG01-snap-gene-1793.40	87.2541	52.4968	0.731866	0.0879752	0.73513	179318427	179319450	918
maker-LG07-snap-gene-1243.1	3.0878	20.5545	-2.73866	0.0880509	0.73513	124352487	124354329	1596
maker-LG02-snap-gene-1729.11	209.468	467.78	-1.15838	0.088056	0.73513	172879853	172883818	3513
snap_masked-LG06-processed-gene-317.10	9.99255	1.5379	2.66174	0.0880575	0.73513	31717262	31722596	2056
maker-LG03-augustus-gene-1460.55	12.1996	55.7497	-2.19505	0.0881127	0.735212	146001048	146003245	1714
maker-LG06-snap-gene-57.16	479.11	700.194	-0.547088	0.0883301	0.735818	5777578	5782232	1855
maker-LG08-snap-gene-1033.3	146.31	92.6699	0.661827	0.088364	0.735818	103353146	103356720	2230
maker-LG01-snap-gene-1792.61	34.5975	16.8773	1.03406	0.0883675	0.735818	179235272	179239083	2602
maker-LG01-snap-gene-1850.23	684.317	953.094	-0.478431	0.088443	0.735818	185081349	185085687	1533
maker-LG03-augustus-gene-1532.22	38.4305	75.464	-0.972215	0.0884848	0.735818	153210710	153213130	1641
maker-LG06-augustus-gene-53.13	38.4091	16.179	1.26116	0.0885011	0.735818	5336900	5338872	1658
maker-LG08-snap-gene-1130.11	675.956	1029.61	-0.606592	0.0885195	0.735818	113001473	113005875	3141
maker-LG01-snap-gene-2020.9	350.426	216.359	0.697261	0.0885492	0.735818	202031191	202034842	2217
snap_masked-LG05-processed-gene-152.18	170.41	470.203	-1.46476	0.0886937	0.736334	15242904	15243086	183
maker-LG07-augustus-gene-846.27	1550.93	827.984	0.906007	0.0887024	0.736334	84620114	84622608	1952
maker-LG08-snap-gene-799.12	243.502	139.616	0.799936	0.0887962	0.736369	79923187	79927217	1874
maker-LG01-snap-gene-1811.27	160.911	94.4477	0.766976	0.088841	0.736369	181113894	181117031	2433
maker-LG01-snap-gene-1828.41	29.9317	7.56524	1.99829	0.0888431	0.736369	182813953	182816056	1455
maker-LG06-snap-gene-54.27	82.5131	158.907	-0.943779	0.0889176	0.736609	5392535	5393044	330
snap_masked-LG05-processed-gene-1192.5	35.8243	136.986	-1.93528	0.089163	0.738252	119193582	119195046	1185
maker-LG01-augustus-gene-1975.10	103.301	54.5132	0.917866	0.0892252	0.738252	197506110	197508548	2275
maker-LG06-augustus-gene-495.67	970.718	681.585	0.510697	0.0892666	0.738252	49494343	49497826	2953
maker-LG06-snap-gene-40.15	103.707	53.8265	0.939781	0.0892984	0.738252	4012782	4015026	1112
augustus_masked-LG06-processed-gene-101.46	152.352	98.085	0.632353	0.0894377	0.73889	10109538	10110083	546
maker-LG01-snap-gene-1614.45	134.284	202.86	-0.592869	0.0895678	0.73889	161478152	161483113	4332
augustus_masked-LG03-processed-gene-1509.41	3.00378	10.2226	-1.77291	0.0895735	0.73889	150905189	150908062	1067
maker-LG08-augustus-gene-1176.7	2.24209	11.906	-2.40255	0.0895943	0.73889	117597525	117608329	3891
maker-LG02-snap-gene-777.2	264.215	549.423	-1.05539	0.089604	0.73889	77784547	77786980	1795
maker-LG01-snap-gene-1581.13	138.985	80.142	0.794602	0.0897916	0.739922	158100599	158104095	1328
snap_masked-LG07-processed-gene-1238.16	119.938	35.0421	1.77848	0.0898315	0.739922	123791678	123792280	603
maker-LG07-snap-gene-1201.53	22.7118	69.6644	-1.61742	0.0898663	0.739922	120122570	120126492	1399
maker-LG03-snap-gene-1555.60	324.936	210.815	0.624687	0.0899619	0.740333	155491600	155494590	2645
maker-LG08-snap-gene-1140.39	46.7359	19.515	1.24903	0.0900183	0.74042	114076686	114083852	2878
maker-LG01-snap-gene-1842.64	2115.19	1320.14	0.679653	0.0901752	0.741321	184274096	184276379	1634
snap_masked-LG03-processed-gene-1470.11	205.543	316.185	-0.622646	0.0902195	0.741321	147080708	147084343	2785
maker-LG01-snap-gene-144.2	434.677	584.936	-0.427939	0.0902916	0.741379	14415516	14420062	1597
snap_masked-LG03-processed-gene-1530.35	214.222	336.543	-0.652617	0.0903443	0.741379	153004642	153011836	3635
snap_masked-LG08-processed-gene-1012.8	23.2353	7.59756	1.62849	0.090364	0.741379	101241831	101242625	795
maker-LG05-snap-gene-347.4	293.29	413.92	-0.496278	0.0904456	0.741673	34756032	34759702	1168
snap_masked-LG05-processed-gene-146.1	314.126	223.338	0.493169	0.0905	0.741742	14599556	14605747	2540
snap_masked-LG01-processed-gene-1633.16	132.384	206.127	-0.639548	0.0907793	0.742987	163356262	163356444	183
maker-LG01-snap-gene-51.36	84.6109	34.5963	1.30012	0.0908195	0.742987	5168961	5170686	1285
maker-LG02-snap-gene-1833.70	105.83	64.1196	0.717295	0.0908677	0.742987	183361229	183363213	1369
snap_masked-LG01-processed-gene-449.39	513.662	1218.5	-1.24635	0.0910434	0.742987	44979143	44982236	1728
snap_masked-LG03-processed-gene-1473.12	421.91	670.385	-0.668295	0.0910706	0.742987	147304716	147305489	774
augustus_masked-LG01-processed-gene-212.7	274.412	384.984	-0.48725	0.091138	0.742987	21212985	21215963	1156
snap_masked-LG01-processed-gene-315.5	69.1072	25.3998	1.45586	0.0911553	0.742987	31523087	31524490	1404
maker-LG06-augustus-gene-329.8	777.84	448.473	0.795552	0.0911612	0.742987	32932779	32935332	2100
augustus_masked-LG07-processed-gene-1218.50	21.6601	3.99705	2.404	0.0911635	0.742987	121803630	121804022	393
maker-LG03-snap-gene-190.28	273.221	479.718	-0.812244	0.0911689	0.742987	18998944	19005381	3104
[truncated: 15,749 more rows]
