# Supplementary material for: Differential gene expression analysis and physiological response characteristics of passion fruit (Passiflora edulis) buds under high-temperature stress
Source: PeerJ. 2023 Feb 2;11:e14839. doi: 10.7717/peerj.14839 (PMC9899434; doi:10.7717/peerj.14839)
Supplement: Supplemental Information 3 [file peerj-11-14839-s003.xls]

## Sheet: HTvsCK_deg_all
Annex S3. Original data of 215 DEGs
gene_id	HT	CK	log2FoldChange	pvalue	padj	gene_chr	gene_start	gene_end	gene_length
snap_masked-LG06-processed-gene-64.8	18703.1	32.6108	9.18108	4.11e-47	6.64e-43	GWHAZTM00000006	6441261	6442032	573
maker-LG01-augustus-gene-1841.26	4370.59	3.1817	10.5584	2.95e-36	2.38e-32	GWHAZTM00000001	184095844	184097706	1004
snap_masked-LG06-processed-gene-65.4	1416.51	14.2617	6.65431	1.02e-35	5.48e-32	GWHAZTM00000006	6535214	6535582	369
maker-LG01-snap-gene-911.9	743.81	2.9615	7.9693	2.57e-35	1.04e-31	GWHAZTM00000001	91138213	91143748	2409
snap_masked-LG07-processed-gene-1228.32	371.464	13.8954	4.71141	3.45e-28	1.11e-24	GWHAZTM00000007	122821966	122823258	1293
maker-Contig20-snap-gene-1.98	251.895	2.59506	6.57945	3.46e-25	9.34e-22	GWHAZTM00000029	279491	283288	1620
maker-LG02-augustus-gene-1357.20	17.3115	1954.94	-6.8206	1.9e-24	4.4e-21	GWHAZTM00000002	135734615	135735716	642
augustus_masked-LG06-processed-gene-65.16	2407.47	18.9635	7.0099	2.85e-24	5.77e-21	GWHAZTM00000006	6564920	6566535	906
maker-LG03-snap-gene-1552.63	179.362	3.56791	5.63047	2.93e-21	5.28e-18	GWHAZTM00000003	155200204	155208256	5143
snap_masked-LG01-processed-gene-1681.46	784.478	85.9795	3.19033	7.37e-21	1.19e-17	GWHAZTM00000001	168167406	168167846	441
snap_masked-Contig8-processed-gene-0.42	381.368	0	11.0128	1.07e-16	1.58e-13	GWHAZTM00000017	44190	45281	879
snap_masked-LG06-processed-gene-149.9	162.805	1.29753	6.94763	1.35e-16	1.82e-13	GWHAZTM00000006	14983959	14989607	3557
maker-Contig10-snap-gene-4.3	195.646	5.65108	5.16109	5.91e-16	7.35e-13	GWHAZTM00000019	518713	522167	2406
maker-LG06-augustus-gene-244.29	212.22	1.49613	7.04166	1.34e-15	1.55e-12	GWHAZTM00000006	24436712	24446479	1924
maker-LG01-snap-gene-1001.1	288.105	0.282521	9.64676	6.19e-15	6.67e-12	GWHAZTM00000001	100117058	100120941	1782
augustus_masked-LG06-processed-gene-157.25	874.518	0.648569	10.3702	1.17e-14	1.18e-11	GWHAZTM00000006	15761377	15761862	486
maker-LG03-snap-gene-1549.4	129.857	4.99073	4.70372	3.76e-14	3.58e-11	GWHAZTM00000003	154888086	154890452	765
augustus_masked-LG06-processed-gene-154.56	214.525	0.732487	8.32897	5.29e-14	4.76e-11	GWHAZTM00000006	15432238	15432954	717
maker-LG01-snap-gene-1050.8	133.022	5.28503	4.70306	2.35e-13	2e-10	GWHAZTM00000001	105018004	105020868	1192
maker-LG06-augustus-gene-42.76	133.627	0.889326	7.09482	3.98e-13	3.22e-10	GWHAZTM00000006	4235980	4241437	3071
maker-LG06-augustus-gene-411.16	229.598	5.61992	5.41973	8.62e-13	6.64e-10	GWHAZTM00000006	41174821	41178039	2590
snap_masked-LG06-processed-gene-154.10	108.541	1.87318	5.98779	1.16e-12	8.52e-10	GWHAZTM00000006	15420954	15429828	3333
maker-LG01-snap-gene-1669.43	177.354	0.282521	8.94686	1.37e-12	9.64e-10	GWHAZTM00000001	166955186	166961845	2529
augustus_masked-LG06-processed-gene-67.45	10788.4	536.906	4.32832	1.53e-12	1.03e-09	GWHAZTM00000006	6766847	6767443	597
maker-Contig2-snap-gene-0.48	95.9912	2.1447	5.40411	1.6e-12	1.04e-09	GWHAZTM00000011	27904	33982	3257
maker-LG01-snap-gene-4.22	494.682	40.1526	3.63342	1.71e-12	1.06e-09	GWHAZTM00000001	454565	457422	1836
augustus_masked-Contig2-processed-gene-0.64	160.253	0.606805	7.93312	6.53e-12	3.91e-09	GWHAZTM00000011	16913	20634	1932
maker-Contig20-augustus-gene-1.8	91.6149	0	8.95506	7.88e-12	4.55e-09	GWHAZTM00000029	226941	229361	2226
maker-LG05-augustus-gene-1367.7	27.6007	332.157	-3.58864	1.06e-11	5.92e-09	GWHAZTM00000005	136764526	136768309	2654
maker-LG05-snap-gene-37.93	86.7128	1.33929	6.03023	2.79e-11	1.5e-08	GWHAZTM00000005	3756826	3762405	1408
maker-LG06-augustus-gene-42.72	117.556	0.565041	7.49455	4.35e-11	2.23e-08	GWHAZTM00000006	4202047	4207743	3726
maker-LG01-snap-gene-1922.16	25.8695	296.559	-3.51502	4.41e-11	2.23e-08	GWHAZTM00000001	192250688	192254447	1870
snap_masked-Contig4-processed-gene-3.9	1.33666	488.617	-8.52089	6.82e-11	3.35e-08	GWHAZTM00000013	332811	333002	192
augustus_masked-LG06-processed-gene-42.34	88.6963	2.02963	5.4663	8.96e-11	4.26e-08	GWHAZTM00000006	4226314	4229981	2327
maker-LG01-snap-gene-1983.37	28.267	1024.86	-5.18205	1.09e-10	5.03e-08	GWHAZTM00000001	198345954	198346843	359
maker-LG03-augustus-gene-1532.30	139.792	15.2779	3.21607	4.51e-10	2.03e-07	GWHAZTM00000003	153250907	153253525	1106
maker-Contig11-snap-gene-0.60	77.9503	0.973244	6.30409	7.95e-10	3.47e-07	GWHAZTM00000020	33791	37082	2394
maker-LG01-augustus-gene-1783.27	66.8695	0	8.50125	1.5e-09	6.37e-07	GWHAZTM00000001	178314508	178317255	2508
maker-LG03-augustus-gene-1549.25	59.3008	1.86257	4.9306	3.9e-09	1.62e-06	GWHAZTM00000003	154899176	154905054	4393
snap_masked-LG01-processed-gene-1839.32	297.585	9.67995	4.96464	4.3e-09	1.74e-06	GWHAZTM00000001	183974512	183975654	430
maker-LG01-snap-gene-1536.60	80.5561	1.66397	5.60715	4.51e-09	1.78e-06	GWHAZTM00000001	153626141	153628775	1626
augustus_masked-Contig5-processed-gene-0.28	110.572	4.0908	4.72547	1.38e-08	5.32e-06	GWHAZTM00000014	25109	34963	3714
snap_masked-Contig5-processed-gene-2.8	75.5651	1.46497	5.78389	1.65e-08	6.21e-06	GWHAZTM00000014	269880	273512	1788
augustus_masked-LG03-processed-gene-1552.55	62.3397	0.408202	7.43807	1.8e-08	6.62e-06	GWHAZTM00000003	155214678	155215481	804
maker-LG01-snap-gene-1801.51	93.7142	1862.16	-4.313	2.3e-08	8.28e-06	GWHAZTM00000001	180094702	180097001	1345
maker-LG05-snap-gene-37.83	38.9603	0	7.72208	2.46e-08	8.64e-06	GWHAZTM00000005	3762845	3766093	1832
maker-LG06-augustus-gene-1140.4	116.891	6.39417	4.25303	2.91e-08	1e-05	GWHAZTM00000006	114021777	114023474	916
maker-Contig11-augustus-gene-0.34	60.2179	1.57966	5.20384	4.43e-08	1.49e-05	GWHAZTM00000020	28189	32967	2505
maker-LG06-augustus-gene-268.14	124.433	25.3528	2.29245	7.87e-08	2.6e-05	GWHAZTM00000006	26786147	26790967	3004
maker-LG06-augustus-gene-310.15	0.987255	151.01	-7.25335	1.32e-07	4.26e-05	GWHAZTM00000006	30988820	30990460	822
maker-Contig29-snap-gene-1.12	66.385	2.51075	4.67942	1.38e-07	4.37e-05	GWHAZTM00000038	189449	192062	1788
maker-LG01-snap-gene-911.8	125.978	9.34506	3.77092	1.64e-07	5.11e-05	GWHAZTM00000001	91137640	91138032	297
maker-LG06-snap-gene-781.8	743.738	1738.59	-1.22506	2.02e-07	6.18e-05	GWHAZTM00000006	78117183	78119767	1038
augustus_masked-LG06-processed-gene-153.7	47.257	0.408202	7.03936	2.06e-07	6.18e-05	GWHAZTM00000006	15383127	15383603	477
snap_masked-LG03-processed-gene-1532.11	7.9612	60.9947	-2.9383	2.88e-07	8.48e-05	GWHAZTM00000003	153218739	153220231	585
maker-LG03-snap-gene-1508.31	249.489	48.4168	2.36204	2.99e-07	8.63e-05	GWHAZTM00000003	150837300	150840951	1764
augustus_masked-LG06-processed-gene-1118.17	57.469	1.5379	5.15558	3.2e-07	9.09e-05	GWHAZTM00000006	111867317	111868522	1206
maker-LG01-snap-gene-55.18	31.527	0	7.41622	3.57e-07	9.96e-05	GWHAZTM00000001	5494201	5496033	534
maker-LG01-snap-gene-129.28	54.0719	0.606805	6.37494	3.83e-07	0.000104913	GWHAZTM00000001	12898830	12909098	6795
maker-LG01-snap-gene-1678.15	30.4588	0	7.3676	4.49e-07	0.000120947	GWHAZTM00000001	167799372	167803669	2182
maker-LG01-snap-gene-1811.30	88.6815	525.721	-2.56673	5.5e-07	0.000145949	GWHAZTM00000001	181154658	181156529	1231
maker-LG01-snap-gene-141.30	46.6286	171.85	-1.88216	6.33e-07	0.000165229	GWHAZTM00000001	14172023	14174527	1140
maker-LG01-snap-gene-1812.48	28.757	223.138	-2.95373	9.22e-07	0.000236825	GWHAZTM00000001	181282482	181284112	1091
maker-LG02-snap-gene-1796.30	1609.16	10280.9	-2.67558	1.12e-06	0.000282854	GWHAZTM00000002	179609312	179610592	984
maker-LG05-augustus-gene-1277.2	236.945	1023.84	-2.11038	1.21e-06	0.000300844	GWHAZTM00000005	127734292	127738201	2229
maker-LG01-snap-gene-1698.23	560.512	15.5179	5.17916	1.26e-06	0.000303845	GWHAZTM00000001	169818402	169820048	1233
maker-LG01-snap-gene-1699.3	124.185	0.889326	7.03993	1.26e-06	0.000303845	GWHAZTM00000001	169948741	169952791	3347
maker-LG05-augustus-gene-37.46	25.3542	0	7.10143	2.3e-06	0.000547142	GWHAZTM00000005	3706576	3709095	1614
maker-LG06-augustus-gene-154.30	32.4994	0.324285	6.49826	3.04e-06	0.000713842	GWHAZTM00000006	15452896	15454296	997
maker-LG03-augustus-gene-22.16	30.5919	481.188	-3.9772	3.47e-06	0.000800869	GWHAZTM00000003	2200336	2203860	2319
maker-Contig5-snap-gene-0.23	395.751	21.2536	4.22503	3.72e-06	0.000848564	GWHAZTM00000014	45272	48673	2022
maker-LG07-augustus-gene-1180.54	340.255	46.1943	2.89231	4.47e-06	0.0010049	GWHAZTM00000007	118060705	118061979	1041
snap_masked-LG01-processed-gene-802.5	115.172	7.60817	3.95099	4.59e-06	0.00101706	GWHAZTM00000001	80197364	80197750	387
maker-LG01-snap-gene-1839.44	642.821	75.8904	3.08621	4.67e-06	0.00102005	GWHAZTM00000001	183970298	183972065	937
maker-LG06-augustus-gene-245.22	903.072	203.86	2.15009	4.98e-06	0.00107461	GWHAZTM00000006	24511653	24518798	2988
snap_masked-LG05-processed-gene-1380.38	515.687	173.643	1.57043	6.5e-06	0.00138283	GWHAZTM00000005	138025912	138029645	2398
maker-LG05-snap-gene-1381.30	725.252	277.636	1.38447	6.63e-06	0.00139384	GWHAZTM00000005	138121870	138126054	2013
maker-LG03-augustus-gene-159.26	998.767	180.65	2.46984	6.84e-06	0.00141781	GWHAZTM00000003	15916145	15919948	2371
augustus_masked-LG05-processed-gene-36.8	99.9908	290.725	-1.53965	7.24e-06	0.00148208	GWHAZTM00000005	3666934	3667971	464
maker-Contig13-snap-gene-3.28	1.68387	90.2779	-5.75204	7.69e-06	0.00155486	GWHAZTM00000022	307168	308729	1220
maker-LG02-snap-gene-1092.0	3864.22	687.724	2.49084	8.03e-06	0.00160419	GWHAZTM00000002	109241484	109243088	1317
maker-LG01-snap-gene-1824.65	30.5669	123.685	-2.01555	8.23e-06	0.00161799	GWHAZTM00000001	182469718	182472458	1424
snap_masked-LG06-processed-gene-1319.4	8.52133	180.017	-4.39696	8.3e-06	0.00161799	GWHAZTM00000006	131960136	131969042	2540
maker-LG06-snap-gene-1141.11	6.12728	3329.13	-9.0878	8.57e-06	0.00165098	GWHAZTM00000006	114131960	114132450	237
maker-Contig11-snap-gene-1.27	108.615	1.78965	5.96877	9.31e-06	0.00177287	GWHAZTM00000020	94901	98739	1884
maker-LG03-augustus-gene-1548.34	20.9257	0	6.82483	1.02e-05	0.00190478	GWHAZTM00000003	154850711	154854340	1511
maker-Contig37-snap-gene-0.32	138.874	39.8964	1.79345	1.02e-05	0.00190478	GWHAZTM00000046	6887	15134	3222
maker-LG06-augustus-gene-8.34	11.3438	80.8821	-2.83407	1.06e-05	0.00195482	GWHAZTM00000006	828434	833156	2074
maker-LG06-snap-gene-76.3	125.05	752.308	-2.58959	1.33e-05	0.00241898	GWHAZTM00000006	7610522	7617157	2397
augustus_masked-LG06-processed-gene-521.4	294.423	3655.99	-3.63426	1.41e-05	0.0025294	GWHAZTM00000006	52140334	52141821	1488
maker-LG03-snap-gene-1460.8	1691.13	478.567	1.82114	1.44e-05	0.00255778	GWHAZTM00000003	146055258	146057046	1350
maker-Contig5-snap-gene-4.19	83.8839	6.24728	3.74698	1.51e-05	0.00265704	GWHAZTM00000014	414730	424571	4391
maker-LG03-augustus-gene-1542.27	5.08126	112.448	-4.47493	1.76e-05	0.00305716	GWHAZTM00000003	154206000	154207185	793
maker-LG01-snap-gene-1675.16	2158.8	287.545	2.90951	1.84e-05	0.00312805	GWHAZTM00000001	167496676	167498314	1530
snap_masked-Contig19-processed-gene-2.22	600.313	214.421	1.48447	1.85e-05	0.00312805	GWHAZTM00000028	204999	209979	1568
maker-LG08-augustus-gene-1127.84	79.2566	328.698	-2.05039	1.86e-05	0.00312805	GWHAZTM00000008	112698088	112699748	1204
maker-LG03-augustus-gene-151.65	91.8831	11.4384	3.04146	2.04e-05	0.00341073	GWHAZTM00000003	15118475	15121962	2057
maker-LG05-augustus-gene-960.1	2309.77	622.559	1.8913	2.18e-05	0.0035989	GWHAZTM00000005	96000869	96006196	1267
maker-LG02-snap-gene-1732.52	450.139	49.6559	3.18618	2.23e-05	0.00363696	GWHAZTM00000002	173274652	173282126	2884
augustus_masked-LG07-processed-gene-1234.14	1.95776	61.3398	-4.95672	2.3e-05	0.00370338	GWHAZTM00000007	123425593	123430032	1934
maker-LG06-augustus-gene-1335.34	375.354	1681.08	-2.16298	2.31e-05	0.00370338	GWHAZTM00000006	133497841	133500176	2153
snap_masked-Contig34-processed-gene-0.50	372.601	45.7183	3.02912	2.34e-05	0.00370786	GWHAZTM00000043	18354	19433	1080
maker-LG01-augustus-gene-1679.28	66.3247	5.72283	3.53908	2.44e-05	0.00383389	GWHAZTM00000001	167917688	167924075	3177
augustus_masked-LG01-processed-gene-273.12	20.5374	187.224	-3.18938	2.74e-05	0.00426562	GWHAZTM00000001	27320762	27322361	1454
maker-LG08-augustus-gene-1134.54	193.323	1469.11	-2.92561	2.87e-05	0.00442492	GWHAZTM00000008	113422722	113425581	2089
maker-LG01-snap-gene-76.19	67.8001	4.86622	3.79457	3.05e-05	0.00465636	GWHAZTM00000001	7646869	7650850	477
snap_masked-LG01-processed-gene-1668.9	206.474	52.0616	1.99294	3.09e-05	0.00467268	GWHAZTM00000001	166788489	166789406	918
maker-Contig12-snap-gene-1.3	41.6186	0	7.81702	3.24e-05	0.00482141	GWHAZTM00000021	155350	156925	768
snap_masked-LG03-processed-gene-1548.48	18.0227	0	6.60892	3.25e-05	0.00482141	GWHAZTM00000003	154855570	154857519	1950
maker-LG01-snap-gene-1853.58	1014.53	337.041	1.58901	3.32e-05	0.00488187	GWHAZTM00000001	185320051	185321438	924
snap_masked-LG02-processed-gene-1472.18	54.6916	332.165	-2.60384	3.39e-05	0.00494524	GWHAZTM00000002	147252392	147260726	1111
maker-LG06-snap-gene-146.62	83.9746	366.291	-2.12378	3.64e-05	0.00522322	GWHAZTM00000006	14658494	14659740	944
maker-Contig13-augustus-gene-3.39	34.8442	122.968	-1.81844	3.65e-05	0.00522322	GWHAZTM00000022	403890	405681	697
maker-LG03-augustus-gene-1391.6	632.435	206.163	1.61522	3.85e-05	0.00546583	GWHAZTM00000003	139107631	139111115	1638
maker-LG09-augustus-gene-24.11	0.679863	35.0125	-5.70922	4.46e-05	0.00626338	GWHAZTM00000009	2423922	2424424	397
augustus_masked-LG03-processed-gene-1583.84	3.0079	58.5912	-4.28598	4.49e-05	0.00626338	GWHAZTM00000003	158335664	158336482	819
maker-LG01-snap-gene-1666.34	29.7486	0.648569	5.49264	4.57e-05	0.00632142	GWHAZTM00000001	166670592	166678957	603
maker-LG01-snap-gene-1845.60	49.9092	460.293	-3.20575	5e-05	0.006854	GWHAZTM00000001	184515464	184516414	588
snap_masked-LG01-processed-gene-1822.53	34.9974	184.091	-2.39368	5.15e-05	0.00700476	GWHAZTM00000001	182253808	182254608	414
maker-LG03-snap-gene-1531.14	6.70856	62.7924	-3.23268	5.22e-05	0.0070396	GWHAZTM00000003	153149086	153154128	2806
maker-LG05-augustus-gene-86.6	809.511	259.611	1.64032	5.35e-05	0.00714889	GWHAZTM00000005	8653363	8654516	849
maker-LG03-snap-gene-15.6	211.368	69.8177	1.60138	5.46e-05	0.00723962	GWHAZTM00000003	1513642	1519583	1466
maker-LG01-snap-gene-1853.57	845.966	208.527	2.02012	5.55e-05	0.00729645	GWHAZTM00000001	185292605	185294101	1033
maker-Contig2-augustus-gene-0.0	92.3857	7.24973	3.65288	5.79e-05	0.00755703	GWHAZTM00000011	4168	10558	3044
maker-LG05-augustus-gene-227.12	140.501	38.9489	1.85945	6.03e-05	0.00780501	GWHAZTM00000005	22756558	22760906	2338
maker-LG07-snap-gene-1217.13	82.2608	5622.35	-6.09497	6.25e-05	0.00801921	GWHAZTM00000007	121751747	121755702	2641
maker-Contig29-augustus-gene-1.94	164.238	64.2042	1.3526	6.32e-05	0.00804936	GWHAZTM00000038	199421	202562	2045
snap_masked-LG02-processed-gene-1839.27	61.5689	3.00287	4.36038	6.43e-05	0.00813246	GWHAZTM00000002	183975976	183976716	741
augustus_masked-LG01-processed-gene-1682.46	40.2707	4.95996	3.05999	7.03e-05	0.00881715	GWHAZTM00000001	168245922	168249879	2644
maker-LG01-snap-gene-1665.14	628.816	202.28	1.63822	7.35e-05	0.00914694	GWHAZTM00000001	166557348	166559192	1382
maker-LG01-snap-gene-416.6	82.3043	4.43708	4.2525	7.58e-05	0.00936159	GWHAZTM00000001	41625427	41627534	2002
maker-LG06-augustus-gene-88.62	4.66046	45.5337	-3.28611	8.1e-05	0.00992815	GWHAZTM00000006	8853515	8856150	1456
maker-LG01-augustus-gene-1387.3	1032.32	3398.81	-1.71895	8.53e-05	0.0103406	GWHAZTM00000001	138713692	138715568	1174
maker-LG07-snap-gene-1223.18	275.436	57.5162	2.26856	8.56e-05	0.0103406	GWHAZTM00000007	122351016	122354247	1980
maker-LG01-snap-gene-814.0	1448.72	622.259	1.21954	8.92e-05	0.0106929	GWHAZTM00000001	81454188	81456073	1796
maker-LG03-snap-gene-799.0	308.573	1065.15	-1.78741	9.26e-05	0.0110123	GWHAZTM00000003	79924576	79927446	1776
maker-LG07-snap-gene-335.3	13.6415	191.415	-3.81406	9.56e-05	0.0111961	GWHAZTM00000007	33504897	33506837	1821
maker-LG01-augustus-gene-1633.3	145.512	50.4027	1.52575	9.59e-05	0.0111961	GWHAZTM00000001	163381729	163384346	1764
maker-LG07-snap-gene-886.31	516.063	1891.12	-1.87343	9.62e-05	0.0111961	GWHAZTM00000007	88631032	88631635	300
snap_masked-LG01-processed-gene-1790.46	1052.71	467.442	1.17069	9.8e-05	0.0113206	GWHAZTM00000001	179024559	179025744	905
maker-LG07-snap-gene-1235.70	1277.46	400.466	1.67449	0.000114237	0.013108	GWHAZTM00000007	123526257	123529990	2279
maker-LG05-snap-gene-1368.25	108.072	307.156	-1.50714	0.000116255	0.0132457	GWHAZTM00000005	136808312	136809098	700
snap_masked-LG06-processed-gene-6.86	222.965	84.3365	1.40236	0.000130348	0.0147475	GWHAZTM00000006	664800	671623	5436
maker-LG05-augustus-gene-1336.36	765.358	254.635	1.58945	0.000141102	0.0157441	GWHAZTM00000005	133635251	133638598	2719
maker-LG02-snap-gene-1798.82	57.8233	325.242	-2.49106	0.00015007	0.01663	GWHAZTM00000002	179831385	179833567	1838
snap_masked-LG08-processed-gene-1092.3	19.6781	247.229	-3.65317	0.00015409	0.0169594	GWHAZTM00000008	109198120	109200726	1741
maker-LG01-snap-gene-1752.88	11.5115	99.2814	-3.11109	0.00016115	0.0176165	GWHAZTM00000001	175272008	175273622	1346
augustus_masked-LG03-processed-gene-1442.2	429.694	126.891	1.75577	0.000169725	0.0183979	GWHAZTM00000003	144265869	144266348	480
maker-LG01-snap-gene-1425.2	48.0828	7.30366	2.71897	0.000170572	0.0183979	GWHAZTM00000001	142582814	142589296	4471
maker-LG01-snap-gene-929.1	233.739	1347.53	-2.5271	0.000172867	0.0184107	GWHAZTM00000001	92967496	92970643	1227
maker-LG03-snap-gene-1570.75	2.37224	70.4784	-4.90031	0.000172967	0.0184107	GWHAZTM00000003	157066864	157067494	420
maker-LG05-snap-gene-37.79	24.8074	1.01501	4.63254	0.000177786	0.0186875	GWHAZTM00000005	3719719	3722584	2778
maker-LG01-augustus-gene-1717.11	698.466	270.609	1.36789	0.000177877	0.0186875	GWHAZTM00000001	171706097	171707296	927
maker-LG03-augustus-gene-1301.1	240.438	1048.23	-2.12448	0.000187292	0.0194243	GWHAZTM00000003	130111981	130113573	1295
maker-LG08-augustus-gene-1159.49	33.2181	4.78152	2.7725	0.000193298	0.0199196	GWHAZTM00000008	115910803	115918667	3944
augustus_masked-LG06-processed-gene-207.26	239.65	527.166	-1.13617	0.000215719	0.0220893	GWHAZTM00000006	20788981	20789697	717
maker-LG01-augustus-gene-177.30	3315.86	1425.01	1.21843	0.000222005	0.0225901	GWHAZTM00000001	17739376	17743686	3308
maker-LG03-augustus-gene-32.3	5.4389	72.2407	-3.73673	0.000227616	0.0229339	GWHAZTM00000003	3281784	3282701	665
maker-LG07-snap-gene-1149.2	60.3057	4.27002	3.851	0.000228219	0.0229339	GWHAZTM00000007	114975257	114977590	1627
augustus_masked-LG08-processed-gene-982.2	431.735	93.0524	2.2138	0.000237426	0.0237118	GWHAZTM00000008	98271669	98272967	1299
maker-LG01-snap-gene-1602.27	53.3441	1.01501	5.73147	0.000240429	0.0237467	GWHAZTM00000001	160251436	160253040	1409
maker-LG08-augustus-gene-1149.26	30.5173	116.962	-1.93355	0.000240711	0.0237467	GWHAZTM00000008	114921774	114927139	3785
augustus_masked-LG09-processed-gene-120.15	221.441	28.3569	2.96511	0.000243594	0.0238855	GWHAZTM00000009	12007054	12008661	1608
maker-LG08-augustus-gene-189.5	408.983	985.255	-1.26841	0.00025179	0.0243958	GWHAZTM00000008	18917118	18918387	993
maker-LG02-snap-gene-1830.87	37.5818	183.162	-2.28325	0.000251814	0.0243958	GWHAZTM00000002	183076102	183078494	870
maker-LG01-snap-gene-1911.0	7.36948	91.3149	-3.6328	0.000258211	0.0247301	GWHAZTM00000001	191116986	191117999	748
maker-LG07-snap-gene-17.2	39.5311	4.0908	3.24535	0.000258322	0.0247301	GWHAZTM00000007	1756931	1757598	548
snap_masked-LG01-processed-gene-2019.86	3.18952	2289.88	-9.48447	0.000270212	0.025593	GWHAZTM00000001	201953564	201954060	497
maker-LG01-snap-gene-1666.25	428.273	158.293	1.43588	0.000270499	0.025593	GWHAZTM00000001	166617570	166624846	3150
snap_masked-LG03-processed-gene-1574.24	283.132	119.24	1.24935	0.000278924	0.0262367	GWHAZTM00000003	157466640	157468254	1534
maker-LG06-snap-gene-57.4	91.2828	8.56125	3.4545	0.000285379	0.0266887	GWHAZTM00000006	5756869	5758658	507
maker-LG03-snap-gene-1554.37	105.535	33.7889	1.6414	0.000289819	0.0269482	GWHAZTM00000003	155477619	155480448	2351
maker-LG06-snap-gene-1301.26	191.895	73.4106	1.38425	0.000293147	0.0270196	GWHAZTM00000006	130169798	130171887	1695
maker-LG07-augustus-gene-1196.3	378.909	846.338	-1.15876	0.000293927	0.0270196	GWHAZTM00000007	119638975	119641552	1521
maker-LG05-augustus-gene-1356.52	243.282	83.4209	1.54214	0.000299499	0.0273032	GWHAZTM00000005	135625206	135629683	1902
augustus_masked-LG06-processed-gene-274.10	863.73	242.267	1.83431	0.000300387	0.0273032	GWHAZTM00000006	27449864	27451048	1185
maker-LG06-augustus-gene-79.2	8.98634	85.8213	-3.25773	0.000303437	0.0274263	GWHAZTM00000006	7908055	7910735	1793
augustus_masked-LG06-processed-gene-68.12	1017.96	224.466	2.18341	0.000309645	0.0276905	GWHAZTM00000006	6880067	6880747	681
maker-LG01-augustus-gene-177.32	702.599	1707.6	-1.28099	0.000309784	0.0276905	GWHAZTM00000001	17751471	17754657	2131
maker-LG07-snap-gene-228.31	190.232	80.9877	1.22916	0.000325476	0.0289334	GWHAZTM00000007	22791478	22795500	1554
maker-LG07-snap-gene-1234.59	677.326	4578.21	-2.75691	0.000331389	0.0292981	GWHAZTM00000007	123447386	123450725	2010
maker-LG01-snap-gene-1846.41	80.8719	2.7625	4.88713	0.000333832	0.0293536	GWHAZTM00000001	184663733	184667426	922
maker-LG03-augustus-gene-32.2	6382.6	3163.21	1.01291	0.000355042	0.0310498	GWHAZTM00000003	3271447	3274403	1727
maker-LG06-augustus-gene-1233.26	24.5098	1.46497	4.14249	0.000357033	0.0310561	GWHAZTM00000006	123332063	123335296	2470
maker-LG01-snap-gene-1608.49	45.139	139.714	-1.63082	0.000361781	0.0313008	GWHAZTM00000001	160821123	160830078	3136
maker-LG06-snap-gene-157.34	29.8931	1.63281	4.34154	0.000368051	0.0316739	GWHAZTM00000006	15725399	15727041	471
maker-LG06-augustus-gene-1326.11	104.365	4.32134	4.55744	0.000376469	0.0321169	GWHAZTM00000006	132598652	132600966	1099
maker-LG07-augustus-gene-269.0	12.4789	0	6.08012	0.000377168	0.0321169	GWHAZTM00000007	26934012	26937879	3507
maker-LG01-snap-gene-1694.78	570.506	3278.81	-2.52276	0.000385266	0.0325778	GWHAZTM00000001	169393799	169396457	1893
maker-LG06-snap-gene-236.26	799.177	273.728	1.54817	0.000387482	0.0325778	GWHAZTM00000006	23603594	23607259	1857
maker-LG03-snap-gene-1552.62	18.1392	0.690723	4.76489	0.000394768	0.0329224	GWHAZTM00000003	155197037	155200005	1343
maker-LG01-snap-gene-1830.22	15.555	0	6.39588	0.000409442	0.0338	GWHAZTM00000001	183063326	183065597	2078
maker-LG07-snap-gene-1229.24	8.43225	49.1802	-2.54898	0.00040947	0.0338	GWHAZTM00000007	122958030	122962854	2472
maker-LG09-augustus-gene-22.51	46.6849	213.241	-2.19126	0.000413361	0.0339481	GWHAZTM00000009	2265452	2272802	4898
maker-LG06-augustus-gene-107.72	26.3939	1.14069	4.64443	0.000416704	0.0340498	GWHAZTM00000006	10707785	10711197	2718
maker-LG06-augustus-gene-199.1	54.6064	5.03327	3.44544	0.000423412	0.034424	GWHAZTM00000006	19889120	19896690	2033
maker-LG06-augustus-gene-123.49	58.1466	1.14069	5.74958	0.000434855	0.0351776	GWHAZTM00000006	12310831	12321024	1488
snap_masked-LG06-processed-gene-55.21	12.7569	0	6.11221	0.000441504	0.0355378	GWHAZTM00000006	5577501	5577986	486
snap_masked-LG01-processed-gene-1784.20	148.451	316.305	-1.09146	0.000445327	0.0356681	GWHAZTM00000001	178433661	178434383	723
maker-LG02-snap-gene-1846.50	1.70282	25.7178	-3.9428	0.00044893	0.0357795	GWHAZTM00000002	184761592	184763558	1473
snap_masked-LG01-processed-gene-1673.34	1432.56	3042.69	-1.08667	0.000473597	0.0375604	GWHAZTM00000001	167296773	167297213	441
augustus_masked-LG08-processed-gene-916.1	36.8983	126.22	-1.77178	0.000513559	0.0405311	GWHAZTM00000008	91651868	91653157	1290
maker-LG01-snap-gene-1776.10	544.382	179.56	1.60076	0.000523908	0.0411471	GWHAZTM00000001	177634828	177637349	2058
augustus_masked-LG06-processed-gene-386.10	244.713	2591.52	-3.40427	0.000527857	0.041257	GWHAZTM00000006	38598784	38599224	441
maker-LG01-snap-gene-1694.76	22.6569	120.079	-2.40142	0.000535398	0.0416452	GWHAZTM00000001	169460315	169465534	2368
maker-LG06-snap-gene-261.11	334.448	160.022	1.06245	0.000545768	0.0422487	GWHAZTM00000006	26094722	26096189	1379
augustus_masked-LG03-processed-gene-1554.23	44.2447	125.983	-1.50838	0.000560966	0.0432184	GWHAZTM00000003	155448365	155449786	1422
maker-LG01-snap-gene-1675.17	812.936	181.031	2.16896	0.000567225	0.0434935	GWHAZTM00000001	167518031	167519966	1819
snap_masked-LG01-processed-gene-1876.43	11.0174	62.215	-2.49504	0.000581135	0.0443499	GWHAZTM00000001	187635772	187637059	1200
maker-LG06-snap-gene-78.6	133.204	51.388	1.37831	0.000623103	0.0472601	GWHAZTM00000006	7829016	7833490	3476
maker-LG06-snap-gene-57.0	221.484	964.65	-2.12287	0.000625111	0.0472601	GWHAZTM00000006	5701255	5703622	879
maker-Contig2-augustus-gene-2.3	784.969	347.933	1.17456	0.000641801	0.0482963	GWHAZTM00000011	237948	239245	313
maker-LG09-snap-gene-144.6	115.898	6.68808	4.14917	0.000656099	0.0490306	GWHAZTM00000009	14444592	14446248	1485
maker-LG06-augustus-gene-75.22	488.261	46.4788	3.3977	0.000657621	0.0490306	GWHAZTM00000006	7555001	7557942	2294
maker-LG07-snap-gene-448.1	0.679863	16.8473	-4.65659	0.000666669	0.0494773	GWHAZTM00000007	44789818	44791893	1233
