# Supplementary material for: Differential gene expression analysis and physiological response characteristics of passion fruit (Passiflora edulis) buds under high-temperature stress
Source: PeerJ. 2023 Feb 2;11:e14839. doi: 10.7717/peerj.14839 (PMC9899434; doi:10.7717/peerj.14839)
Supplement: Supplemental Information 4 [file peerj-11-14839-s004.xls]

## Sheet: HTvsCK.up_GOenrich
Annex S4. 131 up-regulated DEGs in GO enrichment analysis
Category	GOID	Description	GeneRatio	BgRatio	pvalue	padj	geneID	Count
BP	GO:0007275	multicellular organism development	1/47	10/5146	0.0877429	0.716474	maker-LG06-augustus-gene-154.30	1
BP	GO:0032502	developmental process	1/47	10/5146	0.0877429	0.716474	maker-LG06-augustus-gene-154.30	1
BP	GO:0048856	anatomical structure development	1/47	10/5146	0.0877429	0.716474	maker-LG06-augustus-gene-154.30	1
BP	GO:0048518	positive regulation of biological process	1/47	12/5146	0.104364	0.716474	maker-LG06-augustus-gene-154.30	1
BP	GO:0005975	carbohydrate metabolic process	6/47	370/5146	0.118194	0.716474	snap_masked-LG05-processed-gene-1380.38/maker-Contig37-snap-gene-0.32/maker-LG03-snap-gene-1460.8/maker-LG02-snap-gene-1732.52/maker-LG06-snap-gene-1301.26/maker-LG06-augustus-gene-107.72	6
BP	GO:0051704	multi-organism process	1/47	14/5146	0.120689	0.716474	maker-LG01-augustus-gene-1717.11	1
BP	GO:0071804	cellular potassium ion transport	1/47	15/5146	0.128742	0.716474	maker-LG06-augustus-gene-268.14	1
BP	GO:0071805	potassium ion transmembrane transport	1/47	15/5146	0.128742	0.716474	maker-LG06-augustus-gene-268.14	1
BP	GO:0006887	exocytosis	1/47	16/5146	0.136723	0.716474	snap_masked-LG03-processed-gene-1548.48	1
BP	GO:0032940	secretion by cell	1/47	16/5146	0.136723	0.716474	snap_masked-LG03-processed-gene-1548.48	1
BP	GO:0046903	secretion	1/47	16/5146	0.136723	0.716474	snap_masked-LG03-processed-gene-1548.48	1
BP	GO:0032501	multicellular organismal process	1/47	18/5146	0.15247	0.716474	maker-LG06-augustus-gene-154.30	1
BP	GO:0006813	potassium ion transport	1/47	19/5146	0.160238	0.716474	maker-LG06-augustus-gene-268.14	1
BP	GO:0044262	cellular carbohydrate metabolic process	2/47	79/5146	0.162076	0.716474	maker-LG02-snap-gene-1732.52/maker-LG06-snap-gene-1301.26	2
BP	GO:0009607	response to biotic stimulus	1/47	20/5146	0.167937	0.716474	maker-LG05-augustus-gene-86.6	1
BP	GO:0009733	response to auxin	1/47	20/5146	0.167937	0.716474	snap_masked-LG01-processed-gene-802.5	1
BP	GO:0046907	intracellular transport	2/47	85/5146	0.181648	0.716474	snap_masked-LG07-processed-gene-1228.32/maker-Contig2-augustus-gene-0.0	2
BP	GO:0051649	establishment of localization in cell	2/47	85/5146	0.181648	0.716474	snap_masked-LG07-processed-gene-1228.32/maker-Contig2-augustus-gene-0.0	2
BP	GO:0016192	vesicle-mediated transport	2/47	88/5146	0.191569	0.716474	snap_masked-LG03-processed-gene-1548.48/maker-Contig2-augustus-gene-0.0	2
BP	GO:0015698	inorganic anion transport	1/47	26/5146	0.212696	0.716474	maker-Contig11-snap-gene-1.27	1
BP	GO:0015979	photosynthesis	1/47	26/5146	0.212696	0.716474	snap_masked-LG06-processed-gene-149.9	1
BP	GO:0051641	cellular localization	2/47	105/5146	0.248884	0.716474	snap_masked-LG07-processed-gene-1228.32/maker-Contig2-augustus-gene-0.0	2
BP	GO:0042545	cell wall modification	1/47	32/5146	0.255097	0.716474	maker-LG07-augustus-gene-1180.54	1
BP	GO:0006952	defense response	1/47	33/5146	0.261943	0.716474	maker-LG05-augustus-gene-86.6	1
BP	GO:0006811	ion transport	3/47	204/5146	0.285337	0.716474	maker-LG06-augustus-gene-268.14/maker-Contig11-snap-gene-1.27/maker-LG07-snap-gene-1235.70	3
BP	GO:0006928	movement of cell or subcellular component	1/47	38/5146	0.29526	0.716474	maker-LG01-snap-gene-911.9	1
BP	GO:0007018	microtubule-based movement	1/47	38/5146	0.29526	0.716474	maker-LG01-snap-gene-911.9	1
BP	GO:0009719	response to endogenous stimulus	1/47	38/5146	0.29526	0.716474	snap_masked-LG01-processed-gene-802.5	1
BP	GO:0009725	response to hormone	1/47	38/5146	0.29526	0.716474	snap_masked-LG01-processed-gene-802.5	1
BP	GO:0010033	response to organic substance	1/47	38/5146	0.29526	0.716474	snap_masked-LG01-processed-gene-802.5	1
BP	GO:0045229	external encapsulating structure organization	1/47	38/5146	0.29526	0.716474	maker-LG07-augustus-gene-1180.54	1
BP	GO:0071555	cell wall organization	1/47	38/5146	0.29526	0.716474	maker-LG07-augustus-gene-1180.54	1
BP	GO:0071554	cell wall organization or biogenesis	1/47	44/5146	0.333301	0.716474	maker-LG07-augustus-gene-1180.54	1
BP	GO:0006820	anion transport	1/47	45/5146	0.339442	0.716474	maker-Contig11-snap-gene-1.27	1
BP	GO:0098655	cation transmembrane transport	1/47	46/5146	0.345529	0.716474	maker-LG06-augustus-gene-268.14	1
BP	GO:0098660	inorganic ion transmembrane transport	1/47	46/5146	0.345529	0.716474	maker-LG06-augustus-gene-268.14	1
BP	GO:0098662	inorganic cation transmembrane transport	1/47	46/5146	0.345529	0.716474	maker-LG06-augustus-gene-268.14	1
BP	GO:0007017	microtubule-based process	1/47	48/5146	0.357537	0.716474	maker-LG01-snap-gene-911.9	1
BP	GO:0015672	monovalent inorganic cation transport	1/47	51/5146	0.375146	0.716474	maker-LG06-augustus-gene-268.14	1
BP	GO:0006073	cellular glucan metabolic process	1/47	52/5146	0.38091	0.716474	maker-LG02-snap-gene-1732.52	1
BP	GO:0044042	glucan metabolic process	1/47	52/5146	0.38091	0.716474	maker-LG02-snap-gene-1732.52	1
BP	GO:0044264	cellular polysaccharide metabolic process	1/47	52/5146	0.38091	0.716474	maker-LG02-snap-gene-1732.52	1
BP	GO:0034220	ion transmembrane transport	1/47	58/5146	0.414418	0.753781	maker-LG06-augustus-gene-268.14	1
BP	GO:0005976	polysaccharide metabolic process	1/47	59/5146	0.419827	0.753781	maker-LG02-snap-gene-1732.52	1
BP	GO:0006886	intracellular protein transport	1/47	74/5146	0.495332	0.868058	maker-Contig2-augustus-gene-0.0	1
BP	GO:0042221	response to chemical	1/47	78/5146	0.513785	0.868058	snap_masked-LG01-processed-gene-802.5	1
BP	GO:0030001	metal ion transport	1/47	80/5146	0.522763	0.868058	maker-LG06-augustus-gene-268.14	1
BP	GO:0034613	cellular protein localization	1/47	87/5146	0.552924	0.868058	maker-Contig2-augustus-gene-0.0	1
BP	GO:0070727	cellular macromolecule localization	1/47	87/5146	0.552924	0.868058	maker-Contig2-augustus-gene-0.0	1
BP	GO:0032787	monocarboxylic acid metabolic process	1/47	95/5146	0.585113	0.868058	maker-LG06-snap-gene-1301.26	1
BP	GO:0006396	RNA processing	1/47	96/5146	0.588973	0.868058	maker-LG03-snap-gene-15.6	1
BP	GO:0015031	protein transport	1/47	100/5146	0.604067	0.868058	maker-Contig2-augustus-gene-0.0	1
BP	GO:0015833	peptide transport	1/47	100/5146	0.604067	0.868058	maker-Contig2-augustus-gene-0.0	1
BP	GO:0042886	amide transport	1/47	100/5146	0.604067	0.868058	maker-Contig2-augustus-gene-0.0	1
BP	GO:0045184	establishment of protein localization	1/47	102/5146	0.611409	0.868058	maker-Contig2-augustus-gene-0.0	1
BP	GO:0055085	transmembrane transport	3/47	343/5146	0.615332	0.868058	maker-LG06-augustus-gene-268.14/maker-LG07-snap-gene-1235.70/maker-LG01-snap-gene-1425.2	3
BP	GO:0008104	protein localization	1/47	113/5146	0.64947	0.897877	maker-Contig2-augustus-gene-0.0	1
BP	GO:0071705	nitrogen compound transport	1/47	116/5146	0.659201	0.897877	maker-Contig2-augustus-gene-0.0	1
BP	GO:0033036	macromolecule localization	1/47	121/5146	0.674834	0.903591	maker-Contig2-augustus-gene-0.0	1
BP	GO:0071702	organic substance transport	1/47	125/5146	0.686833	0.904331	maker-Contig2-augustus-gene-0.0	1
BP	GO:0016043	cellular component organization	1/47	134/5146	0.712269	0.921133	maker-LG07-augustus-gene-1180.54	1
BP	GO:0006812	cation transport	1/47	138/5146	0.722914	0.921133	maker-LG06-augustus-gene-268.14	1
BP	GO:0071840	cellular component organization or biogenesis	1/47	154/5146	0.761772	0.955237	maker-LG07-augustus-gene-1180.54	1
BP	GO:0006950	response to stress	1/47	162/5146	0.779147	0.961759	maker-LG05-augustus-gene-86.6	1
BP	GO:0019752	carboxylic acid metabolic process	1/47	210/5146	0.860155	0.972997	maker-LG06-snap-gene-1301.26	1
BP	GO:0006508	proteolysis	1/47	213/5146	0.864113	0.972997	maker-LG03-augustus-gene-1548.34	1
BP	GO:0043436	oxoacid metabolic process	1/47	213/5146	0.864113	0.972997	maker-LG06-snap-gene-1301.26	1
BP	GO:0006082	organic acid metabolic process	1/47	214/5146	0.865407	0.972997	maker-LG06-snap-gene-1301.26	1
BP	GO:0006412	translation	1/47	224/5146	0.877708	0.972997	maker-LG06-augustus-gene-1140.4	1
BP	GO:0043043	peptide biosynthetic process	1/47	224/5146	0.877708	0.972997	maker-LG06-augustus-gene-1140.4	1
BP	GO:0006518	peptide metabolic process	1/47	229/5146	0.883439	0.972997	maker-LG06-augustus-gene-1140.4	1
BP	GO:0043604	amide biosynthetic process	1/47	236/5146	0.891022	0.972997	maker-LG06-augustus-gene-1140.4	1
BP	GO:0043603	cellular amide metabolic process	1/47	244/5146	0.899099	0.972997	maker-LG06-augustus-gene-1140.4	1
BP	GO:0050896	response to stimulus	2/47	453/5146	0.928055	0.990479	snap_masked-LG01-processed-gene-802.5/maker-LG05-augustus-gene-86.6	2
BP	GO:0044281	small molecule metabolic process	1/47	331/5146	0.956685	0.990479	maker-LG06-snap-gene-1301.26	1
BP	GO:1901566	organonitrogen compound biosynthetic process	1/47	429/5146	0.983599	0.990479	maker-LG06-augustus-gene-1140.4	1
BP	GO:0006351	transcription, DNA-templated	1/47	482/5146	0.990382	0.990479	augustus_masked-Contig5-processed-gene-0.28	1
BP	GO:0097659	nucleic acid-templated transcription	1/47	482/5146	0.990382	0.990479	augustus_masked-Contig5-processed-gene-0.28	1
BP	GO:0032774	RNA biosynthetic process	1/47	483/5146	0.990479	0.990479	augustus_masked-Contig5-processed-gene-0.28	1
CC	GO:0071944	cell periphery	2022-04-16	86/1866	0.00500447	0.310277	maker-LG07-augustus-gene-1180.54/maker-LG02-snap-gene-1732.52/snap_masked-LG03-processed-gene-1548.48/maker-Contig2-augustus-gene-0.0	4
CC	GO:0005576	extracellular region	2022-02-16	32/1866	0.0294395	0.329503	maker-LG02-snap-gene-1732.52/maker-LG01-augustus-gene-1717.11	2
CC	GO:0044428	nuclear part	2022-02-16	54/1866	0.0761433	0.329503	snap_masked-LG07-processed-gene-1228.32/maker-LG03-snap-gene-15.6	2
CC	GO:0000145	exocyst	2022-01-16	10/1866	0.0827029	0.329503	snap_masked-LG03-processed-gene-1548.48	1
CC	GO:0005938	cell cortex	2022-01-16	10/1866	0.0827029	0.329503	snap_masked-LG03-processed-gene-1548.48	1
CC	GO:0044448	cell cortex part	2022-01-16	10/1866	0.0827029	0.329503	snap_masked-LG03-processed-gene-1548.48	1
CC	GO:0099568	cytoplasmic region	2022-01-16	10/1866	0.0827029	0.329503	snap_masked-LG03-processed-gene-1548.48	1
CC	GO:0005618	cell wall	2022-02-16	59/1866	0.0888178	0.329503	maker-LG07-augustus-gene-1180.54/maker-LG02-snap-gene-1732.52	2
CC	GO:0030312	external encapsulating structure	2022-02-16	59/1866	0.0888178	0.329503	maker-LG07-augustus-gene-1180.54/maker-LG02-snap-gene-1732.52	2
CC	GO:0099023	tethering complex	2022-01-16	11/1866	0.0906107	0.329503	snap_masked-LG03-processed-gene-1548.48	1
CC	GO:0030118	clathrin coat	2022-01-16	12/1866	0.0984545	0.329503	maker-Contig2-augustus-gene-0.0	1
CC	GO:0098797	plasma membrane protein complex	2022-01-16	13/1866	0.106235	0.329503	maker-Contig2-augustus-gene-0.0	1
CC	GO:0044459	plasma membrane part	2022-01-16	14/1866	0.113952	0.329503	maker-Contig2-augustus-gene-0.0	1
CC	GO:0012505	endomembrane system	2022-02-16	73/1866	0.127318	0.329503	snap_masked-LG07-processed-gene-1228.32/maker-Contig2-augustus-gene-0.0	2
CC	GO:0005886	plasma membrane	2022-01-16	17/1866	0.136731	0.329503	maker-Contig2-augustus-gene-0.0	1
CC	GO:0030133	transport vesicle	2022-01-16	17/1866	0.136731	0.329503	maker-Contig2-augustus-gene-0.0	1
CC	GO:0030658	transport vesicle membrane	2022-01-16	17/1866	0.136731	0.329503	maker-Contig2-augustus-gene-0.0	1
CC	GO:0032991	protein-containing complex	2022-06-16	430/1866	0.140551	0.329503	snap_masked-LG07-processed-gene-1228.32/snap_masked-LG06-processed-gene-149.9/maker-LG06-augustus-gene-1140.4/snap_masked-LG03-processed-gene-1548.48/maker-LG03-snap-gene-15.6/maker-Contig2-augustus-gene-0.0	6
CC	GO:0005794	Golgi apparatus	2022-01-16	18/1866	0.144201	0.329503	maker-Contig2-augustus-gene-0.0	1
CC	GO:0044431	Golgi apparatus part	2022-01-16	18/1866	0.144201	0.329503	maker-Contig2-augustus-gene-0.0	1
CC	GO:0005798	Golgi-associated vesicle	2022-01-16	22/1866	0.17348	0.329503	maker-Contig2-augustus-gene-0.0	1
CC	GO:0012506	vesicle membrane	2022-01-16	22/1866	0.17348	0.329503	maker-Contig2-augustus-gene-0.0	1
CC	GO:0030120	vesicle coat	2022-01-16	22/1866	0.17348	0.329503	maker-Contig2-augustus-gene-0.0	1
CC	GO:0030135	coated vesicle	2022-01-16	22/1866	0.17348	0.329503	maker-Contig2-augustus-gene-0.0	1
CC	GO:0030659	cytoplasmic vesicle membrane	2022-01-16	22/1866	0.17348	0.329503	maker-Contig2-augustus-gene-0.0	1
CC	GO:0030660	Golgi-associated vesicle membrane	2022-01-16	22/1866	0.17348	0.329503	maker-Contig2-augustus-gene-0.0	1
CC	GO:0030662	coated vesicle membrane	2022-01-16	22/1866	0.17348	0.329503	maker-Contig2-augustus-gene-0.0	1
CC	GO:0031410	cytoplasmic vesicle	2022-01-16	22/1866	0.17348	0.329503	maker-Contig2-augustus-gene-0.0	1
CC	GO:0031982	vesicle	2022-01-16	22/1866	0.17348	0.329503	maker-Contig2-augustus-gene-0.0	1
CC	GO:0044433	cytoplasmic vesicle part	2022-01-16	22/1866	0.17348	0.329503	maker-Contig2-augustus-gene-0.0	1
CC	GO:0097708	intracellular vesicle	2022-01-16	22/1866	0.17348	0.329503	maker-Contig2-augustus-gene-0.0	1
CC	GO:0009521	photosystem	2022-01-16	23/1866	0.180652	0.329503	snap_masked-LG06-processed-gene-149.9	1
CC	GO:0009579	thylakoid	2022-01-16	26/1866	0.201818	0.329503	snap_masked-LG06-processed-gene-149.9	1
CC	GO:0034357	photosynthetic membrane	2022-01-16	26/1866	0.201818	0.329503	snap_masked-LG06-processed-gene-149.9	1
CC	GO:0044436	thylakoid part	2022-01-16	26/1866	0.201818	0.329503	snap_masked-LG06-processed-gene-149.9	1
CC	GO:0048046	apoplast	2022-01-16	26/1866	0.201818	0.329503	maker-LG02-snap-gene-1732.52	1
CC	GO:0044422	organelle part	2022-03-16	183/1866	0.201953	0.329503	snap_masked-LG07-processed-gene-1228.32/maker-LG03-snap-gene-15.6/maker-Contig2-augustus-gene-0.0	3
CC	GO:0044446	intracellular organelle part	2022-03-16	183/1866	0.201953	0.329503	snap_masked-LG07-processed-gene-1228.32/maker-LG03-snap-gene-15.6/maker-Contig2-augustus-gene-0.0	3
CC	GO:0098796	membrane protein complex	2022-02-16	105/1866	0.226195	0.349826	snap_masked-LG06-processed-gene-149.9/maker-Contig2-augustus-gene-0.0	2
CC	GO:0030117	membrane coat	2022-01-16	31/1866	0.235959	0.349826	maker-Contig2-augustus-gene-0.0	1
CC	GO:0048475	coated membrane	2022-01-16	31/1866	0.235959	0.349826	maker-Contig2-augustus-gene-0.0	1
CC	GO:0031967	organelle envelope	2022-01-16	32/1866	0.242621	0.349826	snap_masked-LG07-processed-gene-1228.32	1
CC	GO:0031975	envelope	2022-01-16	32/1866	0.242621	0.349826	snap_masked-LG07-processed-gene-1228.32	1
CC	GO:0031981	nuclear lumen	2022-01-16	40/1866	0.29399	0.414259	maker-LG03-snap-gene-15.6	1
CC	GO:0098805	whole membrane	2022-01-16	42/1866	0.306312	0.417997	maker-Contig2-augustus-gene-0.0	1
CC	GO:0031974	membrane-enclosed lumen	2022-01-16	45/1866	0.324417	0.417997	maker-LG03-snap-gene-15.6	1
CC	GO:0043233	organelle lumen	2022-01-16	45/1866	0.324417	0.417997	maker-LG03-snap-gene-15.6	1
CC	GO:0070013	intracellular organelle lumen	2022-01-16	45/1866	0.324417	0.417997	maker-LG03-snap-gene-15.6	1
CC	GO:0098588	bounding membrane of organelle	2022-01-16	46/1866	0.330353	0.417997	maker-Contig2-augustus-gene-0.0	1
CC	GO:0031090	organelle membrane	2022-01-16	57/1866	0.392501	0.486701	maker-Contig2-augustus-gene-0.0	1
CC	GO:0044444	cytoplasmic part	2022-03-16	332/1866	0.561975	0.683185	maker-LG06-augustus-gene-1140.4/snap_masked-LG03-processed-gene-1548.48/maker-Contig2-augustus-gene-0.0	3
CC	GO:1902494	catalytic complex	2022-01-16	100/1866	0.587262	0.700197	maker-LG03-snap-gene-15.6	1
CC	GO:0016021	integral component of membrane	2022-04-16	474/1866	0.61015	0.71376	maker-Contig20-augustus-gene-1.8/maker-LG01-snap-gene-1678.15/maker-Contig11-snap-gene-1.27/maker-LG01-snap-gene-1425.2	4
CC	GO:0031224	intrinsic component of membrane	2022-04-16	481/1866	0.623376	0.715728	maker-Contig20-augustus-gene-1.8/maker-LG01-snap-gene-1678.15/maker-Contig11-snap-gene-1.27/maker-LG01-snap-gene-1425.2	4
CC	GO:0005737	cytoplasm	2022-03-16	402/1866	0.70347	0.793003	maker-LG06-augustus-gene-1140.4/snap_masked-LG03-processed-gene-1548.48/maker-Contig2-augustus-gene-0.0	3
CC	GO:0005840	ribosome	2022-01-16	154/1866	0.74942	0.81598	maker-LG06-augustus-gene-1140.4	1
CC	GO:1990904	ribonucleoprotein complex	2022-01-16	165/1866	0.774078	0.81598	maker-LG06-augustus-gene-1140.4	1
CC	GO:0043231	intracellular membrane-bounded organelle	2022-03-16	447/1866	0.776711	0.81598	snap_masked-LG07-processed-gene-1228.32/maker-LG03-snap-gene-15.6/maker-Contig2-augustus-gene-0.0	3
CC	GO:0005634	nucleus	2022-02-16	316/1866	0.782312	0.81598	snap_masked-LG07-processed-gene-1228.32/maker-LG03-snap-gene-15.6	2
CC	GO:0043227	membrane-bounded organelle	2022-03-16	456/1866	0.789658	0.81598	snap_masked-LG07-processed-gene-1228.32/maker-LG03-snap-gene-15.6/maker-Contig2-augustus-gene-0.0	3
CC	GO:0043228	non-membrane-bounded organelle	2022-01-16	217/1866	0.862834	0.862834	maker-LG06-augustus-gene-1140.4	1
CC	GO:0043232	intracellular non-membrane-bounded organelle	2022-01-16	217/1866	0.862834	0.862834	maker-LG06-augustus-gene-1140.4	1
MF	GO:0004866	endopeptidase inhibitor activity	5/68	44/7772	3.68356e-05	0.000893263	snap_masked-LG06-processed-gene-64.8/snap_masked-LG06-processed-gene-65.4/augustus_masked-LG06-processed-gene-65.16/augustus_masked-LG06-processed-gene-67.45/augustus_masked-LG06-processed-gene-68.12	5
MF	GO:0030414	peptidase inhibitor activity	5/68	44/7772	3.68356e-05	0.000893263	snap_masked-LG06-processed-gene-64.8/snap_masked-LG06-processed-gene-65.4/augustus_masked-LG06-processed-gene-65.16/augustus_masked-LG06-processed-gene-67.45/augustus_masked-LG06-processed-gene-68.12	5
MF	GO:0061134	peptidase regulator activity	5/68	44/7772	3.68356e-05	0.000893263	snap_masked-LG06-processed-gene-64.8/snap_masked-LG06-processed-gene-65.4/augustus_masked-LG06-processed-gene-65.16/augustus_masked-LG06-processed-gene-67.45/augustus_masked-LG06-processed-gene-68.12	5
MF	GO:0061135	endopeptidase regulator activity	5/68	44/7772	3.68356e-05	0.000893263	snap_masked-LG06-processed-gene-64.8/snap_masked-LG06-processed-gene-65.4/augustus_masked-LG06-processed-gene-65.16/augustus_masked-LG06-processed-gene-67.45/augustus_masked-LG06-processed-gene-68.12	5
MF	GO:0004857	enzyme inhibitor activity	6/68	78/7772	5.61638e-05	0.00108958	snap_masked-LG06-processed-gene-64.8/snap_masked-LG06-processed-gene-65.4/augustus_masked-LG06-processed-gene-65.16/augustus_masked-LG06-processed-gene-67.45/maker-LG07-augustus-gene-1180.54/augustus_masked-LG06-processed-gene-68.12	6
MF	GO:0030234	enzyme regulator activity	6/68	113/7772	0.000434837	0.00702987	snap_masked-LG06-processed-gene-64.8/snap_masked-LG06-processed-gene-65.4/augustus_masked-LG06-processed-gene-65.16/augustus_masked-LG06-processed-gene-67.45/maker-LG07-augustus-gene-1180.54/augustus_masked-LG06-processed-gene-68.12	6
MF	GO:0098772	molecular function regulator	6/68	130/7772	0.000913828	0.012663	snap_masked-LG06-processed-gene-64.8/snap_masked-LG06-processed-gene-65.4/augustus_masked-LG06-processed-gene-65.16/augustus_masked-LG06-processed-gene-67.45/maker-LG07-augustus-gene-1180.54/augustus_masked-LG06-processed-gene-68.12	6
MF	GO:0051536	iron-sulfur cluster binding	2/68	32/7772	0.0316038	0.340619	augustus_masked-LG06-processed-gene-153.7/maker-LG06-snap-gene-236.26	2
MF	GO:0051540	metal cluster binding	2/68	32/7772	0.0316038	0.340619	augustus_masked-LG06-processed-gene-153.7/maker-LG06-snap-gene-236.26	2
MF	GO:0004553	hydrolase activity, hydrolyzing O-glycosyl compounds	5/68	215/7772	0.039484	0.375036	snap_masked-LG05-processed-gene-1380.38/maker-Contig37-snap-gene-0.32/maker-LG03-snap-gene-1460.8/maker-LG02-snap-gene-1732.52/maker-LG06-augustus-gene-107.72	5
MF	GO:0034062	5'-3' RNA polymerase activity	2/68	40/7772	0.0475381	0.375036	augustus_masked-Contig5-processed-gene-0.28/maker-LG05-augustus-gene-1356.52	2
MF	GO:0097747	RNA polymerase activity	2/68	40/7772	0.0475381	0.375036	augustus_masked-Contig5-processed-gene-0.28/maker-LG05-augustus-gene-1356.52	2
MF	GO:0016798	hydrolase activity, acting on glycosyl bonds	5/68	230/7772	0.0502625	0.375036	snap_masked-LG05-processed-gene-1380.38/maker-Contig37-snap-gene-0.32/maker-LG03-snap-gene-1460.8/maker-LG02-snap-gene-1732.52/maker-LG06-augustus-gene-107.72	5
MF	GO:0005509	calcium ion binding	3/68	104/7772	0.0624709	0.416432	maker-Contig20-augustus-gene-1.8/maker-Contig37-snap-gene-0.32/augustus_masked-LG03-processed-gene-1442.2	3
MF	GO:0016757	transferase activity, transferring glycosyl groups	5/68	247/7772	0.0643967	0.416432	maker-LG02-snap-gene-1732.52/snap_masked-Contig34-processed-gene-0.50/maker-LG01-snap-gene-814.0/maker-LG08-augustus-gene-1159.49/snap_masked-LG03-processed-gene-1574.24	5
MF	GO:0016160	amylase activity	1/68	11/7772	0.092198	0.480155	maker-Contig37-snap-gene-0.32	1
MF	GO:0008408	3'-5' exonuclease activity	1/68	12/7772	0.100152	0.480155	maker-LG03-snap-gene-15.6	1
MF	GO:0004674	protein serine/threonine kinase activity	1/68	13/7772	0.108037	0.480155	maker-Contig20-augustus-gene-1.8	1
MF	GO:0004527	exonuclease activity	1/68	14/7772	0.115854	0.480155	maker-LG03-snap-gene-15.6	1
MF	GO:0015079	potassium ion transmembrane transporter activity	1/68	15/7772	0.123604	0.480155	maker-LG06-augustus-gene-268.14	1
MF	GO:0008236	serine-type peptidase activity	2/68	70/7772	0.124849	0.480155	maker-LG01-snap-gene-1678.15/maker-LG03-augustus-gene-1548.34	2
MF	GO:0017171	serine hydrolase activity	2/68	70/7772	0.124849	0.480155	maker-LG01-snap-gene-1678.15/maker-LG03-augustus-gene-1548.34	2
MF	GO:0003968	RNA-directed 5'-3' RNA polymerase activity	1/68	16/7772	0.131287	0.480155	maker-LG05-augustus-gene-1356.52	1
MF	GO:0005506	iron ion binding	4/68	229/7772	0.139983	0.480155	maker-LG01-snap-gene-1675.16/maker-LG01-snap-gene-1665.14/maker-LG01-snap-gene-416.6/maker-LG01-snap-gene-1675.17	4
MF	GO:0016779	nucleotidyltransferase activity	2/68	81/7772	0.157828	0.480155	augustus_masked-Contig5-processed-gene-0.28/maker-LG05-augustus-gene-1356.52	2
MF	GO:0015318	inorganic molecular entity transmembrane transporter activity	3/68	159/7772	0.162162	0.480155	maker-LG06-augustus-gene-268.14/maker-Contig11-snap-gene-1.27/maker-LG07-snap-gene-1235.70	3
MF	GO:0001871	pattern binding	1/68	22/7772	0.176009	0.480155	maker-Contig20-augustus-gene-1.8	1
MF	GO:0030247	polysaccharide binding	1/68	22/7772	0.176009	0.480155	maker-Contig20-augustus-gene-1.8	1
MF	GO:0020037	heme binding	4/68	254/7772	0.181741	0.480155	maker-LG01-snap-gene-1675.16/maker-LG01-snap-gene-1665.14/maker-LG01-snap-gene-416.6/maker-LG01-snap-gene-1675.17	4
MF	GO:0046906	tetrapyrrole binding	4/68	254/7772	0.181741	0.480155	maker-LG01-snap-gene-1675.16/maker-LG01-snap-gene-1665.14/maker-LG01-snap-gene-416.6/maker-LG01-snap-gene-1675.17	4
MF	GO:0004185	serine-type carboxypeptidase activity	1/68	23/7772	0.183239	0.480155	maker-LG03-augustus-gene-1548.34	1
MF	GO:0003899	DNA-directed 5'-3' RNA polymerase activity	1/68	24/7772	0.190406	0.480155	augustus_masked-Contig5-processed-gene-0.28	1
MF	GO:0015103	inorganic anion transmembrane transporter activity	1/68	24/7772	0.190406	0.480155	maker-Contig11-snap-gene-1.27	1
MF	GO:0016705	oxidoreductase activity, acting on paired donors, with incorporation or reduction of molecular oxygen	4/68	260/7772	0.192343	0.480155	maker-LG01-snap-gene-1675.16/maker-LG01-snap-gene-1665.14/maker-LG01-snap-gene-416.6/maker-LG01-snap-gene-1675.17	4
MF	GO:0015075	ion transmembrane transporter activity	3/68	173/7772	0.192613	0.480155	maker-LG06-augustus-gene-268.14/maker-Contig11-snap-gene-1.27/maker-LG07-snap-gene-1235.70	3
MF	GO:0004180	carboxypeptidase activity	1/68	25/7772	0.197512	0.480155	maker-LG03-augustus-gene-1548.34	1
MF	GO:0010333	terpene synthase activity	1/68	25/7772	0.197512	0.480155	maker-LG06-augustus-gene-75.22	1
MF	GO:0016762	xyloglucan:xyloglucosyl transferase activity	1/68	26/7772	0.204555	0.480155	maker-LG02-snap-gene-1732.52	1
MF	GO:0016838	carbon-oxygen lyase activity, acting on phosphates	1/68	26/7772	0.204555	0.480155	maker-LG06-augustus-gene-75.22	1
MF	GO:0070008	serine-type exopeptidase activity	1/68	26/7772	0.204555	0.480155	maker-LG03-augustus-gene-1548.34	1
MF	GO:0042626	ATPase activity, coupled to transmembrane movement of substances	1/68	28/7772	0.218461	0.480155	maker-LG01-snap-gene-1425.2	1
MF	GO:0043492	ATPase activity, coupled to movement of substances	1/68	28/7772	0.218461	0.480155	maker-LG01-snap-gene-1425.2	1
MF	GO:0016829	lyase activity	2/68	108/7772	0.24373	0.480155	maker-Contig2-augustus-gene-0.0/maker-LG06-augustus-gene-75.22	2
MF	GO:0030599	pectinesterase activity	1/68	32/7772	0.245558	0.480155	maker-LG07-augustus-gene-1180.54	1
MF	GO:0015399	primary active transmembrane transporter activity	1/68	33/7772	0.252186	0.480155	maker-LG01-snap-gene-1425.2	1
MF	GO:0015405	P-P-bond-hydrolysis-driven transmembrane transporter activity	1/68	33/7772	0.252186	0.480155	maker-LG01-snap-gene-1425.2	1
MF	GO:0016758	transferase activity, transferring hexosyl groups	3/68	201/7772	0.257141	0.480155	maker-LG02-snap-gene-1732.52/maker-LG01-snap-gene-814.0/snap_masked-LG03-processed-gene-1574.24	3
MF	GO:0004497	monooxygenase activity	1/68	34/7772	0.258757	0.480155	maker-LG06-snap-gene-236.26	1
MF	GO:0016830	carbon-carbon lyase activity	1/68	34/7772	0.258757	0.480155	maker-Contig2-augustus-gene-0.0	1
MF	GO:0008238	exopeptidase activity	1/68	35/7772	0.26527	0.480155	maker-LG03-augustus-gene-1548.34	1
MF	GO:0008509	anion transmembrane transporter activity	1/68	35/7772	0.26527	0.480155	maker-Contig11-snap-gene-1.27	1
MF	GO:0022857	transmembrane transporter activity	4/68	305/7772	0.277116	0.480155	maker-LG06-augustus-gene-268.14/maker-Contig11-snap-gene-1.27/maker-LG07-snap-gene-1235.70/maker-LG01-snap-gene-1425.2	4
MF	GO:0016701	oxidoreductase activity, acting on single donors with incorporation of molecular oxygen	1/68	37/7772	0.278129	0.480155	maker-LG06-snap-gene-236.26	1
MF	GO:0003777	microtubule motor activity	1/68	38/7772	0.284476	0.480155	maker-LG01-snap-gene-911.9	1
MF	GO:0004252	serine-type endopeptidase activity	1/68	40/7772	0.297003	0.480155	maker-LG01-snap-gene-1678.15	1
MF	GO:0005216	ion channel activity	1/68	40/7772	0.297003	0.480155	maker-LG07-snap-gene-1235.70	1
MF	GO:0015267	channel activity	1/68	40/7772	0.297003	0.480155	maker-LG07-snap-gene-1235.70	1
MF	GO:0022803	passive transmembrane transporter activity	1/68	40/7772	0.297003	0.480155	maker-LG07-snap-gene-1235.70	1
MF	GO:0022838	substrate-specific channel activity	1/68	40/7772	0.297003	0.480155	maker-LG07-snap-gene-1235.70	1
MF	GO:0046873	metal ion transmembrane transporter activity	1/68	40/7772	0.297003	0.480155	maker-LG06-augustus-gene-268.14	1
MF	GO:0008017	microtubule binding	1/68	42/7772	0.309315	0.491861	maker-LG01-snap-gene-911.9	1
MF	GO:0016746	transferase activity, transferring acyl groups	2/68	131/7772	0.318489	0.494876	maker-LG06-snap-gene-1301.26/maker-LG09-snap-gene-144.6	2
MF	GO:0015631	tubulin binding	1/68	44/7772	0.321414	0.494876	maker-LG01-snap-gene-911.9	1
MF	GO:0003774	motor activity	1/68	48/7772	0.344989	0.515505	maker-LG01-snap-gene-911.9	1
MF	GO:0042623	ATPase activity, coupled	1/68	49/7772	0.350756	0.515505	maker-LG01-snap-gene-1425.2	1
MF	GO:0052689	carboxylic ester hydrolase activity	1/68	49/7772	0.350756	0.515505	maker-LG07-augustus-gene-1180.54	1
MF	GO:0140098	catalytic activity, acting on RNA	2/68	143/7772	0.356978	0.516819	augustus_masked-Contig5-processed-gene-0.28/maker-LG05-augustus-gene-1356.52	2
MF	GO:0016835	carbon-oxygen lyase activity	1/68	53/7772	0.373326	0.52482	maker-LG06-augustus-gene-75.22	1
MF	GO:0046527	glucosyltransferase activity	1/68	53/7772	0.373326	0.52482	maker-LG02-snap-gene-1732.52	1
MF	GO:0004518	nuclease activity	1/68	55/7772	0.384319	0.532557	maker-LG03-snap-gene-15.6	1
MF	GO:0009055	electron transfer activity	1/68	60/7772	0.410978	0.561477	augustus_masked-LG06-processed-gene-153.7	1
MF	GO:0005198	structural molecule activity	2/68	170/7772	0.440451	0.578685	maker-LG06-augustus-gene-1140.4/maker-Contig2-augustus-gene-0.0	2
MF	GO:0008092	cytoskeletal protein binding	1/68	66/7772	0.441471	0.578685	maker-LG01-snap-gene-911.9	1
MF	GO:0015077	monovalent inorganic cation transmembrane transporter activity	1/68	66/7772	0.441471	0.578685	maker-LG06-augustus-gene-268.14	1
MF	GO:0000287	magnesium ion binding	1/68	68/7772	0.451285	0.582164	maker-LG06-augustus-gene-75.22	1
MF	GO:0030246	carbohydrate binding	1/68	69/7772	0.456129	0.582164	maker-Contig20-augustus-gene-1.8	1
MF	GO:0050660	flavin adenine dinucleotide binding	1/68	74/7772	0.47972	0.604323	maker-Contig12-snap-gene-1.3	1
MF	GO:0005215	transporter activity	4/68	410/7772	0.485968	0.604344	maker-LG06-augustus-gene-268.14/maker-Contig11-snap-gene-1.27/maker-LG07-snap-gene-1235.70/maker-LG01-snap-gene-1425.2	4
MF	GO:0017111	nucleoside-triphosphatase activity	2/68	192/7772	0.504056	0.618904	maker-LG01-snap-gene-911.9/maker-LG01-snap-gene-1425.2	2
MF	GO:0070011	peptidase activity, acting on L-amino acid peptides	2/68	199/7772	0.523325	0.629946	maker-LG01-snap-gene-1678.15/maker-LG03-augustus-gene-1548.34	2
MF	GO:0016462	pyrophosphatase activity	2/68	200/7772	0.526038	0.629946	maker-LG01-snap-gene-911.9/maker-LG01-snap-gene-1425.2	2
MF	GO:0016818	hydrolase activity, acting on acid anhydrides, in phosphorus-containing anhydrides	2/68	208/7772	0.547371	0.636537	maker-LG01-snap-gene-911.9/maker-LG01-snap-gene-1425.2	2
MF	GO:0016817	hydrolase activity, acting on acid anhydrides	2/68	210/7772	0.552601	0.636537	maker-LG01-snap-gene-911.9/maker-LG01-snap-gene-1425.2	2
MF	GO:0022890	inorganic cation transmembrane transporter activity	1/68	91/7772	0.552636	0.636537	maker-LG06-augustus-gene-268.14	1
MF	GO:0008233	peptidase activity	2/68	212/7772	0.55779	0.636537	maker-LG01-snap-gene-1678.15/maker-LG03-augustus-gene-1548.34	2
MF	GO:0016747	transferase activity, transferring acyl groups other than amino-acyl groups	1/68	97/7772	0.575887	0.640899	maker-LG09-snap-gene-144.6	1
MF	GO:0004175	endopeptidase activity	1/68	99/7772	0.583369	0.640899	maker-LG01-snap-gene-1678.15	1
MF	GO:0022804	active transmembrane transporter activity	1/68	100/7772	0.587061	0.640899	maker-LG01-snap-gene-1425.2	1
MF	GO:0050662	coenzyme binding	2/68	224/7772	0.588041	0.640899	maker-Contig12-snap-gene-1.3/maker-LG03-augustus-gene-32.2	2
MF	GO:0008324	cation transmembrane transporter activity	1/68	104/7772	0.601511	0.641171	maker-LG06-augustus-gene-268.14	1
MF	GO:0016887	ATPase activity	1/68	104/7772	0.601511	0.641171	maker-LG01-snap-gene-1425.2	1
MF	GO:0016788	hydrolase activity, acting on ester bonds	2/68	248/7772	0.643972	0.672863	maker-LG07-augustus-gene-1180.54/maker-LG03-snap-gene-15.6	2
MF	GO:0043531	ADP binding	1/68	117/7772	0.645116	0.672863	maker-LG07-augustus-gene-269.0	1
MF	GO:0003735	structural constituent of ribosome	1/68	153/7772	0.742806	0.766512	maker-LG06-augustus-gene-1140.4	1
MF	GO:0008168	methyltransferase activity	1/68	158/7772	0.754083	0.769959	maker-LG01-snap-gene-1698.23	1
MF	GO:0016741	transferase activity, transferring one-carbon groups	1/68	163/7772	0.764873	0.77284	maker-LG01-snap-gene-1698.23	1
MF	GO:0046983	protein dimerization activity	1/68	229/7772	0.870317	0.870317	maker-LG01-augustus-gene-1679.28	1
