# Supplementary material for: Differential gene expression analysis and physiological response characteristics of passion fruit (Passiflora edulis) buds under high-temperature stress
Source: PeerJ. 2023 Feb 2;11:e14839. doi: 10.7717/peerj.14839 (PMC9899434; doi:10.7717/peerj.14839)
Supplement: Supplemental Information 5 [file peerj-11-14839-s005.xls]

## Sheet: HTvsCK.down_GOenrich
Annex S5. 64 down-regulated DEGs in GO enrichment analysis
Category	GOID	Description	GeneRatio	BgRatio	pvalue	padj	geneID	Count
BP	GO:0006888	ER to Golgi vesicle-mediated transport	2022-01-22	12/5146	0.0501651	0.294206	maker-LG06-snap-gene-76.3	1
BP	GO:0005991	trehalose metabolic process	2022-01-22	14/5146	0.0582888	0.294206	maker-LG01-snap-gene-1694.76	1
BP	GO:0005992	trehalose biosynthetic process	2022-01-22	14/5146	0.0582888	0.294206	maker-LG01-snap-gene-1694.76	1
BP	GO:0006635	fatty acid beta-oxidation	2022-01-22	14/5146	0.0582888	0.294206	maker-LG03-augustus-gene-22.16	1
BP	GO:0009062	fatty acid catabolic process	2022-01-22	14/5146	0.0582888	0.294206	maker-LG03-augustus-gene-22.16	1
BP	GO:0019395	fatty acid oxidation	2022-01-22	14/5146	0.0582888	0.294206	maker-LG03-augustus-gene-22.16	1
BP	GO:0034440	lipid oxidation	2022-01-22	14/5146	0.0582888	0.294206	maker-LG03-augustus-gene-22.16	1
BP	GO:0044242	cellular lipid catabolic process	2022-01-22	14/5146	0.0582888	0.294206	maker-LG03-augustus-gene-22.16	1
BP	GO:0072329	monocarboxylic acid catabolic process	2022-01-22	14/5146	0.0582888	0.294206	maker-LG03-augustus-gene-22.16	1
BP	GO:0046351	disaccharide biosynthetic process	2022-01-22	15/5146	0.0623258	0.294206	maker-LG01-snap-gene-1694.76	1
BP	GO:0048193	Golgi vesicle transport	2022-01-22	15/5146	0.0623258	0.294206	maker-LG06-snap-gene-76.3	1
BP	GO:0009312	oligosaccharide biosynthetic process	2022-01-22	16/5146	0.0663462	0.294206	maker-LG01-snap-gene-1694.76	1
BP	GO:0006629	lipid metabolic process	2022-03-22	232/5146	0.0740824	0.294206	maker-LG03-augustus-gene-22.16/augustus_masked-LG01-processed-gene-273.12/maker-LG07-snap-gene-1234.59	3
BP	GO:0016042	lipid catabolic process	2022-01-22	19/5146	0.078309	0.294206	maker-LG03-augustus-gene-22.16	1
BP	GO:0005984	disaccharide metabolic process	2022-01-22	21/5146	0.0862028	0.294206	maker-LG01-snap-gene-1694.76	1
BP	GO:0030258	lipid modification	2022-01-22	21/5146	0.0862028	0.294206	maker-LG03-augustus-gene-22.16	1
BP	GO:0009311	oligosaccharide metabolic process	2022-01-22	22/5146	0.0901254	0.294206	maker-LG01-snap-gene-1694.76	1
BP	GO:0016054	organic acid catabolic process	2022-01-22	23/5146	0.094032	0.294206	maker-LG03-augustus-gene-22.16	1
BP	GO:0046395	carboxylic acid catabolic process	2022-01-22	23/5146	0.094032	0.294206	maker-LG03-augustus-gene-22.16	1
BP	GO:0006355	regulation of transcription, DNA-templated	2022-04-22	425/5146	0.102488	0.294206	maker-LG03-augustus-gene-1301.1/snap_masked-LG01-processed-gene-1784.20/snap_masked-LG01-processed-gene-1876.43/maker-LG07-snap-gene-448.1	4
BP	GO:0051252	regulation of RNA metabolic process	2022-04-22	425/5146	0.102488	0.294206	maker-LG03-augustus-gene-1301.1/snap_masked-LG01-processed-gene-1784.20/snap_masked-LG01-processed-gene-1876.43/maker-LG07-snap-gene-448.1	4
BP	GO:1903506	regulation of nucleic acid-templated transcription	2022-04-22	425/5146	0.102488	0.294206	maker-LG03-augustus-gene-1301.1/snap_masked-LG01-processed-gene-1784.20/snap_masked-LG01-processed-gene-1876.43/maker-LG07-snap-gene-448.1	4
BP	GO:2001141	regulation of RNA biosynthetic process	2022-04-22	425/5146	0.102488	0.294206	maker-LG03-augustus-gene-1301.1/snap_masked-LG01-processed-gene-1784.20/snap_masked-LG01-processed-gene-1876.43/maker-LG07-snap-gene-448.1	4
BP	GO:0019219	regulation of nucleobase-containing compound metabolic process	2022-04-22	426/5146	0.103168	0.294206	maker-LG03-augustus-gene-1301.1/snap_masked-LG01-processed-gene-1784.20/snap_masked-LG01-processed-gene-1876.43/maker-LG07-snap-gene-448.1	4
BP	GO:0009889	regulation of biosynthetic process	2022-04-22	433/5146	0.107989	0.294206	maker-LG03-augustus-gene-1301.1/snap_masked-LG01-processed-gene-1784.20/snap_masked-LG01-processed-gene-1876.43/maker-LG07-snap-gene-448.1	4
BP	GO:0010556	regulation of macromolecule biosynthetic process	2022-04-22	433/5146	0.107989	0.294206	maker-LG03-augustus-gene-1301.1/snap_masked-LG01-processed-gene-1784.20/snap_masked-LG01-processed-gene-1876.43/maker-LG07-snap-gene-448.1	4
BP	GO:0031326	regulation of cellular biosynthetic process	2022-04-22	433/5146	0.107989	0.294206	maker-LG03-augustus-gene-1301.1/snap_masked-LG01-processed-gene-1784.20/snap_masked-LG01-processed-gene-1876.43/maker-LG07-snap-gene-448.1	4
BP	GO:2000112	regulation of cellular macromolecule biosynthetic process	2022-04-22	433/5146	0.107989	0.294206	maker-LG03-augustus-gene-1301.1/snap_masked-LG01-processed-gene-1784.20/snap_masked-LG01-processed-gene-1876.43/maker-LG07-snap-gene-448.1	4
BP	GO:0044248	cellular catabolic process	2022-02-22	134/5146	0.110873	0.294206	maker-LG03-augustus-gene-22.16/maker-LG01-snap-gene-1752.88	2
BP	GO:0031323	regulation of cellular metabolic process	2022-04-22	439/5146	0.112206	0.294206	maker-LG03-augustus-gene-1301.1/snap_masked-LG01-processed-gene-1784.20/snap_masked-LG01-processed-gene-1876.43/maker-LG07-snap-gene-448.1	4
BP	GO:0051171	regulation of nitrogen compound metabolic process	2022-04-22	439/5146	0.112206	0.294206	maker-LG03-augustus-gene-1301.1/snap_masked-LG01-processed-gene-1784.20/snap_masked-LG01-processed-gene-1876.43/maker-LG07-snap-gene-448.1	4
BP	GO:0080090	regulation of primary metabolic process	2022-04-22	439/5146	0.112206	0.294206	maker-LG03-augustus-gene-1301.1/snap_masked-LG01-processed-gene-1784.20/snap_masked-LG01-processed-gene-1876.43/maker-LG07-snap-gene-448.1	4
BP	GO:0010468	regulation of gene expression	2022-04-22	442/5146	0.114343	0.294206	maker-LG03-augustus-gene-1301.1/snap_masked-LG01-processed-gene-1784.20/snap_masked-LG01-processed-gene-1876.43/maker-LG07-snap-gene-448.1	4
BP	GO:0060255	regulation of macromolecule metabolic process	2022-04-22	449/5146	0.119405	0.294206	maker-LG03-augustus-gene-1301.1/snap_masked-LG01-processed-gene-1784.20/snap_masked-LG01-processed-gene-1876.43/maker-LG07-snap-gene-448.1	4
BP	GO:0019222	regulation of metabolic process	2022-04-22	451/5146	0.12087	0.294206	maker-LG03-augustus-gene-1301.1/snap_masked-LG01-processed-gene-1784.20/snap_masked-LG01-processed-gene-1876.43/maker-LG07-snap-gene-448.1	4
BP	GO:0044282	small molecule catabolic process	2022-01-22	31/5146	0.124713	0.294206	maker-LG03-augustus-gene-22.16	1
BP	GO:1901575	organic substance catabolic process	2022-02-22	150/5146	0.133545	0.294206	maker-LG03-augustus-gene-22.16/maker-LG01-snap-gene-1752.88	2
BP	GO:0009056	catabolic process	2022-02-22	154/5146	0.139377	0.294206	maker-LG03-augustus-gene-22.16/maker-LG01-snap-gene-1752.88	2
BP	GO:0006351	transcription, DNA-templated	2022-04-22	482/5146	0.144615	0.294206	maker-LG03-augustus-gene-1301.1/snap_masked-LG01-processed-gene-1784.20/snap_masked-LG01-processed-gene-1876.43/maker-LG07-snap-gene-448.1	4
BP	GO:0097659	nucleic acid-templated transcription	2022-04-22	482/5146	0.144615	0.294206	maker-LG03-augustus-gene-1301.1/snap_masked-LG01-processed-gene-1784.20/snap_masked-LG01-processed-gene-1876.43/maker-LG07-snap-gene-448.1	4
BP	GO:0032774	RNA biosynthetic process	2022-04-22	483/5146	0.145413	0.294206	maker-LG03-augustus-gene-1301.1/snap_masked-LG01-processed-gene-1784.20/snap_masked-LG01-processed-gene-1876.43/maker-LG07-snap-gene-448.1	4
BP	GO:0006950	response to stress	2022-02-22	162/5146	0.151214	0.294206	maker-LG01-snap-gene-1608.49/maker-LG06-snap-gene-57.0	2
BP	GO:0006855	drug transmembrane transport	2022-01-22	39/5146	0.154401	0.294206	maker-LG06-augustus-gene-79.2	1
BP	GO:0015893	drug transport	2022-01-22	39/5146	0.154401	0.294206	maker-LG06-augustus-gene-79.2	1
BP	GO:0042493	response to drug	2022-01-22	39/5146	0.154401	0.294206	maker-LG06-augustus-gene-79.2	1
BP	GO:0034637	cellular carbohydrate biosynthetic process	2022-01-22	42/5146	0.165284	0.294206	maker-LG01-snap-gene-1694.76	1
BP	GO:0006281	DNA repair	2022-01-22	43/5146	0.168882	0.294206	maker-LG01-snap-gene-1608.49	1
BP	GO:0006974	cellular response to DNA damage stimulus	2022-01-22	44/5146	0.172465	0.294206	maker-LG01-snap-gene-1608.49	1
BP	GO:0006979	response to oxidative stress	2022-01-22	44/5146	0.172465	0.294206	maker-LG06-snap-gene-57.0	1
BP	GO:0033554	cellular response to stress	2022-01-22	44/5146	0.172465	0.294206	maker-LG01-snap-gene-1608.49	1
BP	GO:0071554	cell wall organization or biogenesis	2022-01-22	44/5146	0.172465	0.294206	maker-LG01-snap-gene-1752.88	1
BP	GO:0006820	anion transport	2022-01-22	45/5146	0.176034	0.294518	maker-LG07-snap-gene-1229.24	1
BP	GO:0016051	carbohydrate biosynthetic process	2022-01-22	48/5146	0.186651	0.30637	maker-LG01-snap-gene-1694.76	1
BP	GO:0006631	fatty acid metabolic process	2022-01-22	49/5146	0.190161	0.30637	maker-LG03-augustus-gene-22.16	1
BP	GO:0005975	carbohydrate metabolic process	2022-03-22	370/5146	0.207436	0.328126	augustus_masked-LG07-processed-gene-1234.14/snap_masked-LG01-processed-gene-1822.53/maker-LG01-snap-gene-1694.76	3
BP	GO:1901565	organonitrogen compound catabolic process	2022-01-22	69/5146	0.257397	0.399885	maker-LG01-snap-gene-1752.88	1
BP	GO:0009057	macromolecule catabolic process	2022-01-22	72/5146	0.267011	0.407543	maker-LG01-snap-gene-1752.88	1
BP	GO:0006886	intracellular protein transport	2022-01-22	74/5146	0.273354	0.410031	maker-LG06-snap-gene-76.3	1
BP	GO:0042221	response to chemical	2022-01-22	78/5146	0.285883	0.410732	maker-LG06-augustus-gene-79.2	1
BP	GO:0044262	cellular carbohydrate metabolic process	2022-01-22	79/5146	0.288983	0.410732	maker-LG01-snap-gene-1694.76	1
BP	GO:0050896	response to stimulus	2022-03-22	453/5146	0.305085	0.410732	maker-LG06-augustus-gene-79.2/maker-LG01-snap-gene-1608.49/maker-LG06-snap-gene-57.0	3
BP	GO:0046907	intracellular transport	2022-01-22	85/5146	0.307315	0.410732	maker-LG06-snap-gene-76.3	1
BP	GO:0051649	establishment of localization in cell	2022-01-22	85/5146	0.307315	0.410732	maker-LG06-snap-gene-76.3	1
BP	GO:0034613	cellular protein localization	2022-01-22	87/5146	0.313325	0.410732	maker-LG06-snap-gene-76.3	1
BP	GO:0070727	cellular macromolecule localization	2022-01-22	87/5146	0.313325	0.410732	maker-LG06-snap-gene-76.3	1
BP	GO:0016192	vesicle-mediated transport	2022-01-22	88/5146	0.316311	0.410732	maker-LG06-snap-gene-76.3	1
BP	GO:0017144	drug metabolic process	2022-01-22	88/5146	0.316311	0.410732	maker-LG01-snap-gene-1752.88	1
BP	GO:0006259	DNA metabolic process	2022-01-22	95/5146	0.336869	0.424356	maker-LG01-snap-gene-1608.49	1
BP	GO:0032787	monocarboxylic acid metabolic process	2022-01-22	95/5146	0.336869	0.424356	maker-LG03-augustus-gene-22.16	1
BP	GO:0015031	protein transport	2022-01-22	100/5146	0.351191	0.424356	maker-LG06-snap-gene-76.3	1
BP	GO:0015833	peptide transport	2022-01-22	100/5146	0.351191	0.424356	maker-LG06-snap-gene-76.3	1
BP	GO:0042886	amide transport	2022-01-22	100/5146	0.351191	0.424356	maker-LG06-snap-gene-76.3	1
BP	GO:0045184	establishment of protein localization	2022-01-22	102/5146	0.356837	0.425271	maker-LG06-snap-gene-76.3	1
BP	GO:0051641	cellular localization	2022-01-22	105/5146	0.365218	0.429377	maker-LG06-snap-gene-76.3	1
BP	GO:0008104	protein localization	2022-01-22	113/5146	0.387059	0.448989	maker-LG06-snap-gene-76.3	1
BP	GO:0071705	nitrogen compound transport	2022-01-22	116/5146	0.395064	0.44936	maker-LG06-snap-gene-76.3	1
BP	GO:0044255	cellular lipid metabolic process	2022-01-22	117/5146	0.39771	0.44936	maker-LG03-augustus-gene-22.16	1
BP	GO:0033036	macromolecule localization	2022-01-22	121/5146	0.408183	0.455281	maker-LG06-snap-gene-76.3	1
BP	GO:0071702	organic substance transport	2022-01-22	125/5146	0.418482	0.46086	maker-LG06-snap-gene-76.3	1
BP	GO:1901135	carbohydrate derivative metabolic process	2022-01-22	150/5146	0.47908	0.520999	maker-LG01-snap-gene-1752.88	1
BP	GO:0006811	ion transport	2022-01-22	204/5146	0.590062	0.629679	maker-LG07-snap-gene-1229.24	1
BP	GO:0019752	carboxylic acid metabolic process	2022-01-22	210/5146	0.600896	0.629679	maker-LG03-augustus-gene-22.16	1
BP	GO:0043436	oxoacid metabolic process	2022-01-22	213/5146	0.60621	0.629679	maker-LG03-augustus-gene-22.16	1
BP	GO:0006082	organic acid metabolic process	2022-01-22	214/5146	0.607966	0.629679	maker-LG03-augustus-gene-22.16	1
BP	GO:0051716	cellular response to stimulus	2022-01-22	257/5146	0.676795	0.69272	maker-LG01-snap-gene-1608.49	1
BP	GO:0044281	small molecule metabolic process	2022-01-22	331/5146	0.769092	0.778035	maker-LG03-augustus-gene-22.16	1
BP	GO:0055085	transmembrane transport	2022-01-22	343/5146	0.781453	0.781453	maker-LG06-augustus-gene-79.2	1
CC	GO:0000428	DNA-directed RNA polymerase complex	2022-01-08	11/1866	0.0462832	0.214771	snap_masked-LG01-processed-gene-1784.20	1
CC	GO:0030880	RNA polymerase complex	2022-01-08	11/1866	0.0462832	0.214771	snap_masked-LG01-processed-gene-1784.20	1
CC	GO:0055029	nuclear DNA-directed RNA polymerase complex	2022-01-08	11/1866	0.0462832	0.214771	snap_masked-LG01-processed-gene-1784.20	1
CC	GO:0061695	transferase complex, transferring phosphorus-containing groups	2022-01-08	11/1866	0.0462832	0.214771	snap_masked-LG01-processed-gene-1784.20	1
CC	GO:0030133	transport vesicle	2022-01-08	17/1866	0.0707296	0.214771	maker-LG06-snap-gene-76.3	1
CC	GO:0030658	transport vesicle membrane	2022-01-08	17/1866	0.0707296	0.214771	maker-LG06-snap-gene-76.3	1
CC	GO:0005777	peroxisome	2022-01-08	21/1866	0.086721	0.214771	maker-LG03-augustus-gene-22.16	1
CC	GO:0042579	microbody	2022-01-08	21/1866	0.086721	0.214771	maker-LG03-augustus-gene-22.16	1
CC	GO:0005798	Golgi-associated vesicle	2022-01-08	22/1866	0.090681	0.214771	maker-LG06-snap-gene-76.3	1
CC	GO:0012506	vesicle membrane	2022-01-08	22/1866	0.090681	0.214771	maker-LG06-snap-gene-76.3	1
CC	GO:0030120	vesicle coat	2022-01-08	22/1866	0.090681	0.214771	maker-LG06-snap-gene-76.3	1
CC	GO:0030135	coated vesicle	2022-01-08	22/1866	0.090681	0.214771	maker-LG06-snap-gene-76.3	1
CC	GO:0030659	cytoplasmic vesicle membrane	2022-01-08	22/1866	0.090681	0.214771	maker-LG06-snap-gene-76.3	1
CC	GO:0030660	Golgi-associated vesicle membrane	2022-01-08	22/1866	0.090681	0.214771	maker-LG06-snap-gene-76.3	1
CC	GO:0030662	coated vesicle membrane	2022-01-08	22/1866	0.090681	0.214771	maker-LG06-snap-gene-76.3	1
CC	GO:0031410	cytoplasmic vesicle	2022-01-08	22/1866	0.090681	0.214771	maker-LG06-snap-gene-76.3	1
CC	GO:0031982	vesicle	2022-01-08	22/1866	0.090681	0.214771	maker-LG06-snap-gene-76.3	1
CC	GO:0044433	cytoplasmic vesicle part	2022-01-08	22/1866	0.090681	0.214771	maker-LG06-snap-gene-76.3	1
CC	GO:0097708	intracellular vesicle	2022-01-08	22/1866	0.090681	0.214771	maker-LG06-snap-gene-76.3	1
CC	GO:1990234	transferase complex	2022-01-08	25/1866	0.102471	0.23056	snap_masked-LG01-processed-gene-1784.20	1
CC	GO:0005654	nucleoplasm	2022-01-08	28/1866	0.114127	0.233442	snap_masked-LG01-processed-gene-1784.20	1
CC	GO:0044451	nucleoplasm part	2022-01-08	28/1866	0.114127	0.233442	snap_masked-LG01-processed-gene-1784.20	1
CC	GO:0030117	membrane coat	2022-01-08	31/1866	0.125651	0.235595	maker-LG06-snap-gene-76.3	1
CC	GO:0048475	coated membrane	2022-01-08	31/1866	0.125651	0.235595	maker-LG06-snap-gene-76.3	1
CC	GO:0031981	nuclear lumen	2022-01-08	40/1866	0.159438	0.254985	snap_masked-LG01-processed-gene-1784.20	1
CC	GO:0098805	whole membrane	2022-01-08	42/1866	0.166789	0.254985	maker-LG06-snap-gene-76.3	1
CC	GO:0031974	membrane-enclosed lumen	2022-01-08	45/1866	0.17771	0.254985	snap_masked-LG01-processed-gene-1784.20	1
CC	GO:0043233	organelle lumen	2022-01-08	45/1866	0.17771	0.254985	snap_masked-LG01-processed-gene-1784.20	1
CC	GO:0070013	intracellular organelle lumen	2022-01-08	45/1866	0.17771	0.254985	snap_masked-LG01-processed-gene-1784.20	1
CC	GO:0044422	organelle part	2022-02-08	183/1866	0.180923	0.254985	maker-LG06-snap-gene-76.3/snap_masked-LG01-processed-gene-1784.20	2
CC	GO:0044446	intracellular organelle part	2022-02-08	183/1866	0.180923	0.254985	maker-LG06-snap-gene-76.3/snap_masked-LG01-processed-gene-1784.20	2
CC	GO:0098588	bounding membrane of organelle	2022-01-08	46/1866	0.181323	0.254985	maker-LG06-snap-gene-76.3	1
CC	GO:0044428	nuclear part	2022-01-08	54/1866	0.209726	0.28599	snap_masked-LG01-processed-gene-1784.20	1
CC	GO:0031090	organelle membrane	2022-01-08	57/1866	0.220153	0.291379	maker-LG06-snap-gene-76.3	1
CC	GO:0012505	endomembrane system	2022-01-08	73/1866	0.273755	0.351971	maker-LG06-snap-gene-76.3	1
CC	GO:0043227	membrane-bounded organelle	2022-03-08	456/1866	0.307299	0.384124	maker-LG03-augustus-gene-22.16/maker-LG06-snap-gene-76.3/snap_masked-LG01-processed-gene-1784.20	3
CC	GO:1902494	catalytic complex	2022-01-08	100/1866	0.356924	0.434096	snap_masked-LG01-processed-gene-1784.20	1
CC	GO:0098796	membrane protein complex	2022-01-08	105/1866	0.371374	0.439785	maker-LG06-snap-gene-76.3	1
CC	GO:0044444	cytoplasmic part	2022-02-08	332/1866	0.430434	0.496655	maker-LG03-augustus-gene-22.16/maker-LG06-snap-gene-76.3	2
CC	GO:0005737	cytoplasm	2022-02-08	402/1866	0.54146	0.609143	maker-LG03-augustus-gene-22.16/maker-LG06-snap-gene-76.3	2
CC	GO:0032991	protein-containing complex	2022-02-08	430/1866	0.582754	0.639608	maker-LG06-snap-gene-76.3/snap_masked-LG01-processed-gene-1784.20	2
CC	GO:0043231	intracellular membrane-bounded organelle	2022-02-08	447/1866	0.606814	0.650157	maker-LG03-augustus-gene-22.16/snap_masked-LG01-processed-gene-1784.20	2
CC	GO:0016021	integral component of membrane	2022-02-08	474/1866	0.643366	0.667329	snap_masked-LG08-processed-gene-1092.3/maker-LG07-snap-gene-1229.24	2
CC	GO:0031224	intrinsic component of membrane	2022-02-08	481/1866	0.6525	0.667329	snap_masked-LG08-processed-gene-1092.3/maker-LG07-snap-gene-1229.24	2
CC	GO:0005634	nucleus	2022-01-08	316/1866	0.774042	0.774042	snap_masked-LG01-processed-gene-1784.20	1
MF	GO:0010333	terpene synthase activity	2/34	25/7772	0.0052326	0.161115	snap_masked-LG06-processed-gene-1319.4/maker-LG01-snap-gene-1694.78	2
MF	GO:0016838	carbon-oxygen lyase activity, acting on phosphates	2/34	26/7772	0.00565317	0.161115	snap_masked-LG06-processed-gene-1319.4/maker-LG01-snap-gene-1694.78	2
MF	GO:0004553	hydrolase activity, hydrolyzing O-glycosyl compounds	4/34	215/7772	0.0137865	0.211566	augustus_masked-LG07-processed-gene-1234.14/maker-LG08-augustus-gene-1134.54/snap_masked-LG01-processed-gene-1822.53/maker-LG01-snap-gene-1752.88	4
MF	GO:0016798	hydrolase activity, acting on glycosyl bonds	4/34	230/7772	0.017275	0.211566	augustus_masked-LG07-processed-gene-1234.14/maker-LG08-augustus-gene-1134.54/snap_masked-LG01-processed-gene-1822.53/maker-LG01-snap-gene-1752.88	4
MF	GO:0043565	sequence-specific DNA binding	3/34	136/7772	0.0211175	0.211566	maker-LG03-augustus-gene-1301.1/snap_masked-LG01-processed-gene-1876.43/maker-LG07-snap-gene-448.1	3
MF	GO:0016835	carbon-oxygen lyase activity	2/34	53/7772	0.0222701	0.211566	snap_masked-LG06-processed-gene-1319.4/maker-LG01-snap-gene-1694.78	2
MF	GO:0000287	magnesium ion binding	2/34	68/7772	0.0353495	0.287846	snap_masked-LG06-processed-gene-1319.4/maker-LG01-snap-gene-1694.78	2
MF	GO:0003995	acyl-CoA dehydrogenase activity	1/34	12/7772	0.0512867	0.297358	maker-LG03-augustus-gene-22.16	1
MF	GO:0004506	squalene monooxygenase activity	1/34	13/7772	0.0554435	0.297358	snap_masked-LG08-processed-gene-1092.3	1
MF	GO:0003997	acyl-CoA oxidase activity	1/34	14/7772	0.0595825	0.297358	maker-LG03-augustus-gene-22.16	1
MF	GO:0016634	oxidoreductase activity, acting on the CH-CH group of donors, oxygen as acceptor	1/34	15/7772	0.063704	0.297358	maker-LG03-augustus-gene-22.16	1
MF	GO:0005509	calcium ion binding	2/34	104/7772	0.075444	0.297358	maker-LG03-augustus-gene-32.3/maker-LG01-augustus-gene-177.32	2
MF	GO:0015035	protein disulfide oxidoreductase activity	1/34	18/7772	0.0759634	0.297358	maker-LG06-augustus-gene-8.34	1
MF	GO:0016829	lyase activity	2/34	108/7772	0.0805224	0.297358	snap_masked-LG06-processed-gene-1319.4/maker-LG01-snap-gene-1694.78	2
MF	GO:0015036	disulfide oxidoreductase activity	1/34	22/7772	0.0920672	0.297358	maker-LG06-augustus-gene-8.34	1
MF	GO:0003700	DNA binding transcription factor activity	3/34	253/7772	0.0975079	0.297358	maker-LG03-augustus-gene-1301.1/snap_masked-LG01-processed-gene-1876.43/maker-LG07-snap-gene-448.1	3
MF	GO:0003899	DNA-directed 5'-3' RNA polymerase activity	1/34	24/7772	0.100017	0.297358	snap_masked-LG01-processed-gene-1784.20	1
MF	GO:0003690	double-stranded DNA binding	1/34	25/7772	0.103966	0.297358	maker-LG01-snap-gene-1608.49	1
MF	GO:0005543	phospholipid binding	1/34	25/7772	0.103966	0.297358	maker-LG01-augustus-gene-177.32	1
MF	GO:0016667	oxidoreductase activity, acting on a sulfur group of donors	1/34	27/7772	0.111814	0.297358	maker-LG06-augustus-gene-8.34	1
MF	GO:0016709	oxidoreductase activity, acting on paired donors, with incorporation or reduction of molecular oxygen, NAD(P)H as one donor, and incorporation of one atom of oxygen	1/34	27/7772	0.111814	0.297358	snap_masked-LG08-processed-gene-1092.3	1
MF	GO:0140110	transcription regulator activity	3/34	272/7772	0.11477	0.297358	maker-LG03-augustus-gene-1301.1/snap_masked-LG01-processed-gene-1876.43/maker-LG07-snap-gene-448.1	3
MF	GO:0016627	oxidoreductase activity, acting on the CH-CH group of donors	1/34	32/7772	0.131144	0.325009	maker-LG03-augustus-gene-22.16	1
MF	GO:0004497	monooxygenase activity	1/34	34/7772	0.138761	0.329558	snap_masked-LG08-processed-gene-1092.3	1
MF	GO:0034062	5'-3' RNA polymerase activity	1/34	40/7772	0.161226	0.348152	snap_masked-LG01-processed-gene-1784.20	1
MF	GO:0097747	RNA polymerase activity	1/34	40/7772	0.161226	0.348152	snap_masked-LG01-processed-gene-1784.20	1
MF	GO:0015238	drug transmembrane transporter activity	1/34	41/7772	0.164914	0.348152	maker-LG06-augustus-gene-79.2	1
MF	GO:0004601	peroxidase activity	1/34	52/7772	0.204461	0.408758	maker-LG06-snap-gene-57.0	1
MF	GO:0016684	oxidoreductase activity, acting on peroxide as acceptor	1/34	53/7772	0.207965	0.408758	maker-LG06-snap-gene-57.0	1
MF	GO:0016209	antioxidant activity	1/34	58/7772	0.225259	0.427993	maker-LG06-snap-gene-57.0	1
MF	GO:0015297	antiporter activity	1/34	63/7772	0.242188	0.43735	maker-LG06-augustus-gene-79.2	1
MF	GO:0008289	lipid binding	1/34	64/7772	0.24553	0.43735	maker-LG01-augustus-gene-177.32	1
MF	GO:0015291	secondary active transmembrane transporter activity	1/34	67/7772	0.255471	0.441268	maker-LG06-augustus-gene-79.2	1
MF	GO:0050660	flavin adenine dinucleotide binding	1/34	74/7772	0.278175	0.466353	snap_masked-LG08-processed-gene-1092.3	1
MF	GO:0016779	nucleotidyltransferase activity	1/34	81/7772	0.300207	0.488909	snap_masked-LG01-processed-gene-1784.20	1
MF	GO:0016705	oxidoreductase activity, acting on paired donors, with incorporation or reduction of molecular oxygen	2/34	260/7772	0.315558	0.499634	maker-LG07-snap-gene-335.3/snap_masked-LG08-processed-gene-1092.3	2
MF	GO:0022804	active transmembrane transporter activity	1/34	100/7772	0.356768	0.547344	maker-LG06-augustus-gene-79.2	1
MF	GO:0016887	ATPase activity	1/34	104/7772	0.368097	0.547344	maker-LG09-augustus-gene-22.51	1
MF	GO:0001883	purine nucleoside binding	1/34	125/7772	0.42447	0.547344	maker-LG07-augustus-gene-1196.3	1
MF	GO:0005525	GTP binding	1/34	125/7772	0.42447	0.547344	maker-LG07-augustus-gene-1196.3	1
MF	GO:0032549	ribonucleoside binding	1/34	125/7772	0.42447	0.547344	maker-LG07-augustus-gene-1196.3	1
MF	GO:0032550	purine ribonucleoside binding	1/34	125/7772	0.42447	0.547344	maker-LG07-augustus-gene-1196.3	1
MF	GO:0032561	guanyl ribonucleotide binding	1/34	125/7772	0.42447	0.547344	maker-LG07-augustus-gene-1196.3	1
MF	GO:0001882	nucleoside binding	1/34	126/7772	0.427029	0.547344	maker-LG07-augustus-gene-1196.3	1
MF	GO:0019001	guanyl nucleotide binding	1/34	128/7772	0.432113	0.547344	maker-LG07-augustus-gene-1196.3	1
MF	GO:0008270	zinc ion binding	2/34	356/7772	0.465856	0.568639	maker-LG06-snap-gene-781.8/maker-LG06-snap-gene-76.3	2
MF	GO:0140098	catalytic activity, acting on RNA	1/34	143/7772	0.468878	0.568639	snap_masked-LG01-processed-gene-1784.20	1
MF	GO:0017111	nucleoside-triphosphatase activity	1/34	192/7772	0.573576	0.678142	maker-LG09-augustus-gene-22.51	1
MF	GO:0016462	pyrophosphatase activity	1/34	200/7772	0.588646	0.678142	maker-LG09-augustus-gene-22.51	1
MF	GO:0016818	hydrolase activity, acting on acid anhydrides, in phosphorus-containing anhydrides	1/34	208/7772	0.6032	0.678142	maker-LG09-augustus-gene-22.51	1
MF	GO:0016817	hydrolase activity, acting on acid anhydrides	1/34	210/7772	0.606759	0.678142	maker-LG09-augustus-gene-22.51	1
MF	GO:0050662	coenzyme binding	1/34	224/7772	0.630822	0.687295	snap_masked-LG08-processed-gene-1092.3	1
MF	GO:0005506	iron ion binding	1/34	229/7772	0.639064	0.687295	maker-LG07-snap-gene-335.3	1
MF	GO:0020037	heme binding	1/34	254/7772	0.677669	0.702312	maker-LG07-snap-gene-335.3	1
MF	GO:0046906	tetrapyrrole binding	1/34	254/7772	0.677669	0.702312	maker-LG07-snap-gene-335.3	1
MF	GO:0022857	transmembrane transporter activity	1/34	305/7772	0.744395	0.757687	maker-LG06-augustus-gene-79.2	1
MF	GO:0005215	transporter activity	1/34	410/7772	0.842242	0.842242	maker-LG06-augustus-gene-79.2	1
