# Supplementary material for: Differential gene expression analysis and physiological response characteristics of passion fruit (Passiflora edulis) buds under high-temperature stress
Source: PeerJ. 2023 Feb 2;11:e14839. doi: 10.7717/peerj.14839 (PMC9899434; doi:10.7717/peerj.14839)
Supplement: Supplemental Information 7 [file peerj-11-14839-s007.xls]

## Sheet: HTvsCK.all_KEGGenrich
Annex S7. 53 DEGs were annotated to 52 KEGG metabolic pathways
KEGGID	Description	GeneRatio	BgRatio	pvalue	padj	geneID	Count	Up	Up_Gene_id	Down	Down_Gene_id
ath00902	Monoterpenoid biosynthesis	3/53	29/4125	0.00578131	0.297384	maker-LG01-augustus-gene-1841.26/snap_masked-LG01-processed-gene-1839.32/maker-LG01-snap-gene-1839.44	3	3	maker-LG01-augustus-gene-1841.26/snap_masked-LG01-processed-gene-1839.32/maker-LG01-snap-gene-1839.44	0
ath00909	Sesquiterpenoid and triterpenoid biosynthesis	3/53	37/4125	0.0114378	0.297384	maker-Contig12-snap-gene-1.3/snap_masked-LG08-processed-gene-1092.3/maker-LG01-snap-gene-1694.78	3	1	maker-Contig12-snap-gene-1.3	2	snap_masked-LG08-processed-gene-1092.3/maker-LG01-snap-gene-1694.78
ath01212	Fatty acid metabolism	4/53	113/4125	0.0559828	0.715561	maker-LG03-snap-gene-1549.4/maker-LG03-augustus-gene-22.16/augustus_masked-LG01-processed-gene-273.12/maker-LG01-snap-gene-1846.41	4	2	maker-LG03-snap-gene-1549.4/maker-LG01-snap-gene-1846.41	2	maker-LG03-augustus-gene-22.16/augustus_masked-LG01-processed-gene-273.12
ath00500	Starch and sucrose metabolism	5/53	169/4125	0.0641446	0.715561	maker-Contig37-snap-gene-0.32/augustus_masked-LG07-processed-gene-1234.14/snap_masked-LG01-processed-gene-1822.53/maker-LG06-augustus-gene-107.72/maker-LG01-snap-gene-1694.76	5	2	maker-Contig37-snap-gene-0.32/maker-LG06-augustus-gene-107.72	3	augustus_masked-LG07-processed-gene-1234.14/snap_masked-LG01-processed-gene-1822.53/maker-LG01-snap-gene-1694.76
ath00520	Amino sugar and nucleotide sugar metabolism	4/53	126/4125	0.0771566	0.715561	maker-LG01-snap-gene-1752.88/maker-LG08-augustus-gene-1159.49/augustus_masked-LG08-processed-gene-982.2/maker-LG03-augustus-gene-32.2	4	3	maker-LG08-augustus-gene-1159.49/augustus_masked-LG08-processed-gene-982.2/maker-LG03-augustus-gene-32.2	1	maker-LG01-snap-gene-1752.88
ath00100	Steroid biosynthesis	2/53	41/4125	0.0967113	0.715561	maker-Contig12-snap-gene-1.3/snap_masked-LG08-processed-gene-1092.3	2	1	maker-Contig12-snap-gene-1.3	1	snap_masked-LG08-processed-gene-1092.3
ath00590	Arachidonic acid metabolism	1/53	10/4125	0.12143	0.715561	maker-LG06-snap-gene-57.0	1	0		1	maker-LG06-snap-gene-57.0
ath00640	Propanoate metabolism	2/53	47/4125	0.121543	0.715561	maker-LG03-snap-gene-1549.4/maker-LG03-augustus-gene-22.16	2	1	maker-LG03-snap-gene-1549.4	1	maker-LG03-augustus-gene-22.16
ath00040	Pentose and glucuronate interconversions	2/53	59/4125	0.174989	0.715561	maker-LG07-augustus-gene-1180.54/maker-LG03-snap-gene-1531.14	2	1	maker-LG07-augustus-gene-1180.54	1	maker-LG03-snap-gene-1531.14
ath03010	Ribosome	5/53	244/4125	0.202101	0.715561	snap_masked-LG01-processed-gene-1681.46/maker-LG01-snap-gene-4.22/maker-LG06-augustus-gene-1140.4/augustus_masked-LG05-processed-gene-36.8/snap_masked-LG01-processed-gene-1673.34	5	3	snap_masked-LG01-processed-gene-1681.46/maker-LG01-snap-gene-4.22/maker-LG06-augustus-gene-1140.4	2	augustus_masked-LG05-processed-gene-36.8/snap_masked-LG01-processed-gene-1673.34
ath00062	Fatty acid elongation	1/53	18/4125	0.208049	0.715561	maker-LG01-snap-gene-1846.41	1	1	maker-LG01-snap-gene-1846.41	0
ath01040	Biosynthesis of unsaturated fatty acids	2/53	68/4125	0.217169	0.715561	maker-LG03-augustus-gene-22.16/augustus_masked-LG01-processed-gene-273.12	2	0		2	maker-LG03-augustus-gene-22.16/augustus_masked-LG01-processed-gene-273.12
ath00460	Cyanoamino acid metabolism	2/53	70/4125	0.226683	0.715561	augustus_masked-LG07-processed-gene-1234.14/snap_masked-LG01-processed-gene-1822.53	2	0		2	augustus_masked-LG07-processed-gene-1234.14/snap_masked-LG01-processed-gene-1822.53
ath00904	Diterpenoid biosynthesis	1/53	21/4125	0.238322	0.715561	snap_masked-LG06-processed-gene-1319.4	1	0		1	snap_masked-LG06-processed-gene-1319.4
ath00941	Flavonoid biosynthesis	1/53	22/4125	0.248158	0.715561	maker-LG01-snap-gene-1665.14	1	1	maker-LG01-snap-gene-1665.14	0
ath02010	ABC transporters	1/53	23/4125	0.25787	0.715561	maker-LG01-snap-gene-1425.2	1	1	maker-LG01-snap-gene-1425.2	0
ath00620	Pyruvate metabolism	2/53	78/4125	0.264995	0.715561	maker-LG03-snap-gene-1549.4/maker-LG06-snap-gene-1301.26	2	2	maker-LG03-snap-gene-1549.4/maker-LG06-snap-gene-1301.26	0
ath00480	Glutathione metabolism	2/53	86/4125	0.303382	0.715561	maker-LG03-augustus-gene-1542.27/maker-LG06-snap-gene-57.0	2	0		2	maker-LG03-augustus-gene-1542.27/maker-LG06-snap-gene-57.0
ath03020	RNA polymerase	1/53	29/4125	0.313609	0.715561	snap_masked-LG01-processed-gene-1784.20	1	0		1	snap_masked-LG01-processed-gene-1784.20
ath04712	Circadian rhythm - plant	1/53	29/4125	0.313609	0.715561	maker-LG06-augustus-gene-1335.34	1	0		1	maker-LG06-augustus-gene-1335.34
ath00908	Zeatin biosynthesis	1/53	31/4125	0.331259	0.715561	snap_masked-LG03-processed-gene-1574.24	1	1	snap_masked-LG03-processed-gene-1574.24	0
ath03430	Mismatch repair	1/53	31/4125	0.331259	0.715561	maker-LG05-augustus-gene-1336.36	1	1	maker-LG05-augustus-gene-1336.36	0
ath00195	Photosynthesis	1/53	37/4125	0.381581	0.715561	snap_masked-LG06-processed-gene-149.9	1	1	snap_masked-LG06-processed-gene-149.9	0
ath00400	Phenylalanine, tyrosine and tryptophan biosynthesis	1/53	38/4125	0.389598	0.715561	maker-Contig2-augustus-gene-0.0	1	1	maker-Contig2-augustus-gene-0.0	0
ath03030	DNA replication	1/53	38/4125	0.389598	0.715561	maker-LG05-augustus-gene-1336.36	1	1	maker-LG05-augustus-gene-1336.36	0
ath00510	N-Glycan biosynthesis	1/53	39/4125	0.397514	0.715561	maker-LG06-snap-gene-157.34	1	1	maker-LG06-snap-gene-157.34	0
ath00220	Arginine biosynthesis	1/53	40/4125	0.405329	0.715561	maker-LG07-snap-gene-1149.2	1	1	maker-LG07-snap-gene-1149.2	0
ath04016	MAPK signaling pathway - plant	2/53	109/4125	0.411028	0.715561	maker-LG02-snap-gene-1798.82/maker-LG03-augustus-gene-32.3	2	0		2	maker-LG02-snap-gene-1798.82/maker-LG03-augustus-gene-32.3
ath00061	Fatty acid biosynthesis	1/53	45/4125	0.442936	0.715561	maker-LG03-snap-gene-1549.4	1	1	maker-LG03-snap-gene-1549.4	0
ath00053	Ascorbate and aldarate metabolism	1/53	47/4125	0.457316	0.715561	maker-LG03-augustus-gene-32.2	1	1	maker-LG03-augustus-gene-32.2	0
ath00860	Porphyrin and chlorophyll metabolism	1/53	48/4125	0.464369	0.715561	maker-LG06-snap-gene-236.26	1	1	maker-LG06-snap-gene-236.26	0
ath04626	Plant-pathogen interaction	2/53	124/4125	0.477004	0.715561	augustus_masked-LG03-processed-gene-1442.2/maker-LG03-augustus-gene-32.3	2	1	augustus_masked-LG03-processed-gene-1442.2	1	maker-LG03-augustus-gene-32.3
ath03440	Homologous recombination	1/53	53/4125	0.498307	0.715561	maker-LG05-augustus-gene-1336.36	1	1	maker-LG05-augustus-gene-1336.36	0
ath00940	Phenylpropanoid biosynthesis	2/53	130/4125	0.502171	0.715561	augustus_masked-LG07-processed-gene-1234.14/snap_masked-LG01-processed-gene-1822.53	2	0		2	augustus_masked-LG07-processed-gene-1234.14/snap_masked-LG01-processed-gene-1822.53
ath03420	Nucleotide excision repair	1/53	55/4125	0.511284	0.715561	maker-LG05-augustus-gene-1336.36	1	1	maker-LG05-augustus-gene-1336.36	0
ath04070	Phosphatidylinositol signaling system	1/53	57/4125	0.523931	0.715561	maker-LG03-augustus-gene-32.3	1	0		1	maker-LG03-augustus-gene-32.3
ath04075	Plant hormone signal transduction	3/53	220/4125	0.543462	0.715561	snap_masked-LG01-processed-gene-802.5/maker-LG02-snap-gene-1732.52/maker-LG02-snap-gene-1798.82	3	2	snap_masked-LG01-processed-gene-802.5/maker-LG02-snap-gene-1732.52	1	maker-LG02-snap-gene-1798.82
ath00071	Fatty acid degradation	1/53	63/4125	0.559976	0.715561	maker-LG03-augustus-gene-22.16	1	0		1	maker-LG03-augustus-gene-22.16
ath00561	Glycerolipid metabolism	1/53	63/4125	0.559976	0.715561	snap_masked-LG05-processed-gene-1380.38	1	1	snap_masked-LG05-processed-gene-1380.38	0
ath01210	2-Oxocarboxylic acid metabolism	1/53	65/4125	0.571385	0.715561	maker-LG07-snap-gene-1149.2	1	1	maker-LG07-snap-gene-1149.2	0
ath00410	beta-Alanine metabolism	1/53	67/4125	0.582504	0.715561	maker-LG03-augustus-gene-22.16	1	0		1	maker-LG03-augustus-gene-22.16
ath00051	Fructose and mannose metabolism	1/53	69/4125	0.593339	0.715561	maker-LG03-snap-gene-1460.8	1	1	maker-LG03-snap-gene-1460.8	0
ath03008	Ribosome biogenesis in eukaryotes	1/53	70/4125	0.598653	0.715561	maker-LG07-snap-gene-17.2	1	1	maker-LG07-snap-gene-17.2	0
ath00630	Glyoxylate and dicarboxylate metabolism	1/53	72/4125	0.609077	0.715561	maker-LG06-snap-gene-1301.26	1	1	maker-LG06-snap-gene-1301.26	0
ath00592	alpha-Linolenic acid metabolism	1/53	74/4125	0.619236	0.715561	maker-LG03-augustus-gene-22.16	1	0		1	maker-LG03-augustus-gene-22.16
ath01200	Carbon metabolism	3/53	283/4125	0.715516	0.807575	maker-LG03-snap-gene-1549.4/maker-LG03-augustus-gene-22.16/maker-LG06-snap-gene-1301.26	3	2	maker-LG03-snap-gene-1549.4/maker-LG06-snap-gene-1301.26	1	maker-LG03-augustus-gene-22.16
ath04146	Peroxisome	1/53	100/4125	0.729924	0.807575	maker-LG03-augustus-gene-22.16	1	0		1	maker-LG03-augustus-gene-22.16
ath03018	RNA degradation	1/53	111/4125	0.766609	0.830493	maker-LG03-snap-gene-15.6	1	1	maker-LG03-snap-gene-15.6	0
ath01230	Biosynthesis of amino acids	2/53	224/4125	0.792229	0.840733	maker-Contig2-augustus-gene-0.0/maker-LG07-snap-gene-1149.2	2	2	maker-Contig2-augustus-gene-0.0/maker-LG07-snap-gene-1149.2	0
ath04144	Endocytosis	1/53	139/4125	0.839341	0.860127	maker-LG01-snap-gene-129.28	1	1	maker-LG01-snap-gene-129.28	0
ath03013	RNA transport	1/53	141/4125	0.843586	0.860127	maker-Contig2-snap-gene-0.48	1	1	maker-Contig2-snap-gene-0.48	0
ath04141	Protein processing in endoplasmic reticulum	1/53	165/4125	0.886688	0.886688	maker-LG06-snap-gene-76.3	1	0		1	maker-LG06-snap-gene-76.3
