# Supplementary material for: Differential gene expression analysis and physiological response characteristics of passion fruit (Passiflora edulis) buds under high-temperature stress
Source: PeerJ. 2023 Feb 2;11:e14839. doi: 10.7717/peerj.14839 (PMC9899434; doi:10.7717/peerj.14839)
Supplement: Supplemental Information 9 [file peerj-11-14839-s009.xls]

## Sheet: up
Annex S9. Results of up-regulating DEG pathway enrichment
KEGGID	Description	GeneRatio	pvalue	Count
Metabolism	Monoterpenoid biosynthesis	3/34	0.00161524	3
Metabolism	Amino sugar and nucleotide sugar metabolism	3/34	0.0838654	3
Metabolism	Pyruvate metabolism	2/34	0.134518	2
Metabolism	Fatty acid elongation	1/34	0.138679	1
Metabolism	Flavonoid biosynthesis	1/34	0.166859	1
Environmental Information Processing	ABC transporters	1/34	0.173762	1
Metabolism	Zeatin biosynthesis	1/34	0.22703	1
Genetic Information Processing	Mismatch repair	1/34	0.22703	1
Metabolism	Fatty acid metabolism	2/34	0.238495	2
Metabolism	Photosynthesis	1/34	0.264778	1
Metabolism	Sesquiterpenoid and triterpenoid biosynthesis	1/34	0.264778	1
Metabolism	Phenylalanine, tyrosine and tryptophan biosynthesis	1/34	0.270893	1
Genetic Information Processing	DNA replication	1/34	0.270893	1
Metabolism	N-Glycan biosynthesis	1/34	0.276959	1
Metabolism	Arginine biosynthesis	1/34	0.282975	1
Metabolism	Steroid biosynthesis	1/34	0.288943	1
Metabolism	Fatty acid biosynthesis	1/34	0.312336	1
Metabolism	Ascorbate and aldarate metabolism	1/34	0.323751	1
Metabolism	Propanoate metabolism	1/34	0.323751	1
Genetic Information Processing	Ribosome	3/34	0.326295	3
Metabolism	Porphyrin and chlorophyll metabolism	1/34	0.329389	1
Genetic Information Processing	Homologous recombination	1/34	0.356903	1
Genetic Information Processing	Nucleotide excision repair	1/34	0.367598	1
Metabolism	Pentose and glucuronate interconversions	1/34	0.388474	1
Metabolism	Glycerolipid metabolism	1/34	0.408681	1
Metabolism	Starch and sucrose metabolism	2/34	0.409085	2
Metabolism	2-Oxocarboxylic acid metabolism	1/34	0.41854	1
Metabolism	Fructose and mannose metabolism	1/34	0.437781	1
Genetic Information Processing	Ribosome biogenesis in eukaryotes	1/34	0.442494	1
Metabolism	Glyoxylate and dicarboxylate metabolism	1/34	0.451805	1
Environmental Information Processing	Plant hormone signal transduction	2/34	0.548673	2
Metabolism	Biosynthesis of amino acids	2/34	0.558669	2
Genetic Information Processing	RNA degradation	1/34	0.60593	1
Organismal Systems	Plant-pathogen interaction	1/34	0.647243	1
Metabolism	Carbon metabolism	2/34	0.6885	2
Cellular Processes	Endocytosis	1/34	0.689699	1
Genetic Information Processing	RNA transport	1/34	0.694971	1
