# Supplementary material for: Differential gene expression analysis and physiological response characteristics of passion fruit (Passiflora edulis) buds under high-temperature stress
Source: PeerJ. 2023 Feb 2;11:e14839. doi: 10.7717/peerj.14839 (PMC9899434; doi:10.7717/peerj.14839)
Supplement: Supplemental Information 10 [file peerj-11-14839-s010.xls]

## Sheet: down
Annex S10. Enrichment results of DEG pathways down-regulated by expression level
KEGGID	Description	GeneRatio	pvalue	Count
Metabolism	Sesquiterpenoid and triterpenoid biosynthesis	0.105263	0.0121629	2
Metabolism	Biosynthesis of unsaturated fatty acids	0.105263	0.0382278	2
Metabolism	Cyanoamino acid metabolism	0.105263	0.040307	2
Metabolism	Starch and sucrose metabolism	0.157895	0.0403968	3
Metabolism	Arachidonic acid metabolism	0.0526316	0.0451658	1
Metabolism	Glutathione metabolism	0.105263	0.0584093	2
Environmental Information Processing	MAPK signaling pathway - plant	0.105263	0.0883891	2
Metabolism	Diterpenoid biosynthesis	0.0526316	0.0926138	1
Metabolism	Fatty acid metabolism	0.105263	0.0940069	2
Metabolism	Phenylpropanoid biosynthesis	0.105263	0.118995	2
Genetic Information Processing	RNA polymerase	0.0526316	0.125709	1
Organismal Systems	Circadian rhythm - plant	0.0526316	0.125709	1
Metabolism	Steroid biosynthesis	0.0526316	0.173215	1
Metabolism	Propanoate metabolism	0.0526316	0.196041	1
Environmental Information Processing	Phosphatidylinositol signaling system	0.0526316	0.232763	1
Metabolism	Pentose and glucuronate interconversions	0.0526316	0.239914	1
Metabolism	Fatty acid degradation	0.0526316	0.254027	1
Metabolism	beta-Alanine metabolism	0.0526316	0.267891	1
Metabolism	alpha-Linolenic acid metabolism	0.0526316	0.291569	1
Genetic Information Processing	Ribosome	0.105263	0.311059	2
Cellular Processes	Peroxisome	0.0526316	0.373317	1
Organismal Systems	Plant-pathogen interaction	0.0526316	0.440774	1
Metabolism	Amino sugar and nucleotide sugar metabolism	0.0526316	0.446073	1
Genetic Information Processing	Protein processing in endoplasmic reticulum	0.0526316	0.540378	1
Environmental Information Processing	Plant hormone signal transduction	0.0526316	0.64785	1
Metabolism	Carbon metabolism	0.0526316	0.741652	1
